# Supplementary material for: Interactions between microfinance programmes and non-economic empowerment of women associated with intimate partner violence in Bangladesh: a cross-sectional study
Source: PubMed Central journal article supplement — BMJ Open. 2013 Dec 6;3(12):e002941. doi: 10.1136/bmjopen-2013-002941 (PMC3855592; doi:10.1136/bmjopen-2013-002941), 2013-12-06

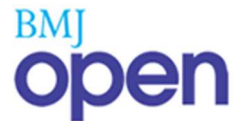

**Interactions between microfinance programs and non-economic empowerment of women associated with intimate partner violence in Bangladesh**

|                                 |                                                                                                                                                                                                                                                                                                                                  |
|---------------------------------|----------------------------------------------------------------------------------------------------------------------------------------------------------------------------------------------------------------------------------------------------------------------------------------------------------------------------------|
| Journal:                        | <i>BMJ Open</i>                                                                                                                                                                                                                                                                                                                  |
| Manuscript ID:                  | bmjopen-2013-002941                                                                                                                                                                                                                                                                                                              |
| Article Type:                   | Research                                                                                                                                                                                                                                                                                                                         |
| Date Submitted by the Author:   | 25-Mar-2013                                                                                                                                                                                                                                                                                                                      |
| Complete List of Authors:       | Dalal, Assoc. Prof. Koustuv; Örebro University, Director, Centre for Injury Prevention & safety Promotion (CIPSP), School of Health and Medical Sciences<br>Dahlstrom, Orjan; Linköping University, Department of Medical and Health Sciences<br>Timpka, Toomas; Linköping University, Department of Medical and Health Sciences |
| <b>Primary Subject Heading</b>: | Public health                                                                                                                                                                                                                                                                                                                    |
| Secondary Subject Heading:      | Epidemiology                                                                                                                                                                                                                                                                                                                     |
| Keywords:                       | PUBLIC HEALTH, Health economics < HEALTH SERVICES ADMINISTRATION & MANAGEMENT, EPIDEMIOLOGY                                                                                                                                                                                                                                      |
|                                 |                                                                                                                                                                                                                                                                                                                                  |

SCHOLARONE™  
Manuscripts

1  
2  
3  
4 Interactions between microfinance programs and non-economic  
5 empowerment of women associated with intimate partner  
6 violence in Bangladesh  
7  
8  
9

10  
11  
12 Koustuv Dalal<sup>1\*</sup>, Örjan Dahlstöm<sup>2,3</sup>, Toomas Timpka<sup>2</sup>  
13

14  
15  
16 1 School of Health and Medical Sciences, Örebro University, Örebro, Sweden  
17

18  
19 2 Department of Medical and Health Sciences, Linköping University, Linköping, Sweden  
20

21  
22 3 Linnaeus Centre HEAD, Swedish Institute for Disability Research, Department of Behavioural  
23  
24 Sciences and Learning, Linköping University, Sweden  
25  
26  
27  
28  
29

30  
31 **Running title:** Microfinance and violence against women (2807 words)  
32

33  
34 \* Corresponding author: Koustuv Dalal, PhD, Department of Public Health Science, School of  
35  
36 Health & Medical Sciences, Örebro University, Örebro, Sweden.  
37

38  
39 Email: [koustuv2010@hotmail.com](mailto:koustuv2010@hotmail.com)  
40  
41  
42  
43  
44  
45  
46  
47  
48  
49  
50  
51  
52  
53  
54  
55  
56  
57  
58  
59  
60

## Abstract

**Objective:** This study aims to examine the associations between microfinance program membership and intimate partner violence (IPV) in different socioeconomic strata of a nationally representative sample of women in Bangladesh.

**Methods:** The cross-sectional study was based on a nationally representative interview survey of 11,178 ever-married women of reproductive age (15–49 years). 4465 women answered the IPV-related questions were analyzed separately using chi-square tests and Cramer's  $V$  as a measure of effect size to identify differences in proportions of exposure to IPV with regard to microfinance program membership and demographic variables and interactions between microfinance program membership and factors related to non-economic empowerment were considered.

**Results:** Only 39% of women were members of microfinance programs. The prevalence of a history of IPV was 48% for moderate and 16% for severe physical violence, 16% for sexual violence. For women with secondary or higher education, and women at the two wealthiest levels of the wealth index, microfinance program membership increased the exposure to IPV two three and two times respectively. The least educated and poorest groups showed no change in exposure to IPV associated with microfinance programs. The educated women who were more equal with their spouses in their family relationships by participating in decision-making increased their exposure to IPV by membership in microfinance programs.

**Conclusion:** Microfinance plans are associated with increased exposure to IPV among educated and empowered women in Bangladesh. Microfinance firms should consider providing information about associations between microfinance and IPV to the women belonging to risk groups.

**Key words:** Microfinance, Violence against women, Bangladesh, Cross-sectional, DHS.

**Article focus:**

- Associations between membership in microfinance programs and exposure to intimate partner violence against woman.
- Interactions between empowerment of women through microfinance and non-economic empowerment through spousal equity and formal education.

**Key messages:**

- 51% of the women respondents are victims of any form of intimate partner violence
- For different socioeconomic backgrounds, micro finance association of the women enhances their exposure to intimate partner violence.
- Equity in family decision making for the educated women increased the exposure to IPV by membership in microfinance programs.

**Strengths and limitations of this study:**

- National representative sample from entire Bangladesh
- Cross-sectional study design implies that the results only can be used to hypothesize about IPV causes.

## Introduction

A growing body of research has recognized that intimate partner violence (IPV) has far-reaching health and economic impacts for women and societies worldwide [1]. IPV, in all forms, occurs every day in all parts of the world, cutting across age, religion, societal, ethnic and geographic borders. However, women who live in poverty have been reported to be particularly exposed to IPV [2–5]. The association between domestic violence and gender imbalance is also a known consequence of the subordinate status of women [6, 7]. In this context, economic empowerment has been highlighted in policy making to reduce the gender imbalance and to improve the social status of women [8]. Microfinance programs were introduced in the 1990s throughout the developing world as income-generating projects to provide credit and savings services, particularly to poor women lacking a formal education. Relationships between microfinance programs and improved status of child mortality, nutrition, immunization coverage, and contraceptive use have been documented [9–12]. In addition, descriptive epidemiological studies of associations between microfinance programs and IPV have reported promising findings of reduced IPV [13–15], and a recent cluster randomized trial from southern Africa concluded that a combined microfinance and training program reduced IPV among participants [16]. However, studies using qualitative methods [17] have identified microfinance as an exacerbating factor for IPV in Bangladesh. The interactions between microfinance programs, gender issues, education, and IPV thus warrant further epidemiological investigations in low-income countries.

Bangladesh is known globally for its microfinance programs, especially after the acknowledgment from the Nobel Committee [18]. This study set out to examine the associations

1  
2  
3 between membership in microfinance programs and exposure to IPV in different strata of a  
4 nationally representative sample of women in Bangladesh. In previous research, microfinance  
5 programs have been regarded as a general vehicle for the empowerment and emancipation of  
6 women [4]. Simultaneously, IPV in Bangladesh has been reported as a socio-medical problem  
7 closely related to gender inequality and the position of women in society [5, 19]. Therefore, we  
8 also wanted to study the interactions between empowerment of women through microfinance and  
9 non-economic empowerment through spousal equity and formal education.  
10  
11  
12  
13  
14  
15  
16  
17  
18  
19  
20  
21

## 22 **Methods**

23  
24 The study was based on a cross-sectional design, implemented in Bangladesh through a  
25 nationally representative household survey. Reporting of the study was organized according to  
26 the *Strengthening the Reporting of Observational Studies in Epidemiology (STROBE)* statement  
27 [20].  
28  
29  
30  
31  
32  
33  
34  
35  
36  
37

### 38 **Insert figure 1**

#### 39 *Data collection*

40  
41 Data collection was conducted by an interview survey in all six administrative divisions of  
42 Bangladesh: Barisal, Chittagong, Dhaka, Khulna, Rajshahi, and Sylhet. Details of the survey are  
43 available at [http://www.measuredhs.com/pubs/pdf/FR207/FR207\[April-10-2009\].pdf](http://www.measuredhs.com/pubs/pdf/FR207/FR207[April-10-2009].pdf). The  
44 survey was designed to be representative for most of the demographic indicators for the country  
45 as a whole, for each of the six divisions, and for the urban and the rural areas separately. Initially,  
46 multistage cluster sampling was used, based on the 2001 population census. In total, 361  
47 representative sample clusters were identified, 227 in rural areas and 134 in urban areas. From  
48  
49  
50  
51  
52  
53  
54  
55  
56  
57  
58  
59  
60

1  
2  
3 the sample clusters, 10,819 households were identified for the survey initially. Of these  
4  
5 households, 10,416 were found to be occupied, and 10,400 were available for the survey. All  
6  
7 ever-married women of reproductive age (15–49 years) who slept in the selected households the  
8  
9 night before the survey were defined as being eligible for the present study. From the survey  
10  
11 households, 11,178 eligible women were identified for interview.  
12  
13

14  
15  
16  
17 A total of 128 experienced field staff, trained for the task, in 12 interview teams conducted the  
18  
19 interviews. Each team consisted of one male supervisor, one female field editor, five female  
20  
21 interviewers, two male interviewers, and one logistics staff member. Four quality control teams  
22  
23 ensured data quality; each team included one male and one female data quality control worker. In  
24  
25 the presence of the perpetrator, interviewing the victim carries the risk of further violence.  
26  
27 Therefore, interviewers received special training on conducting an interview on spousal violence  
28  
29 based on a training manual focusing on collecting data on violence in a secure, confidential, and  
30  
31 ethical manner. Moreover, the IPV questionnaires were administered at the end of the interview,  
32  
33 enabling both the interviewer and the respondent to become well acquainted with each other by  
34  
35 the time they were discussing IPV issues [21]. The interview teams were also prepared to help  
36  
37 the women (respondents) if they asked for assistance, such as helping them to go to the women's  
38  
39 shelter, an organization assisting distressed women. The face-to-face interview took place in a  
40  
41 safe and secure place. If privacy could not be secured for the woman, the interviewers did not  
42  
43 ask IPV-related questions.  
44  
45  
46  
47  
48  
49

50  
51 The survey obtained detailed information on demographics, salient health issues, and issues  
52  
53 related to domestic violence. The current study utilized variables covering IPV and membership  
54  
55 of a microfinance program. The following variables were used.  
56  
57  
58  
59  
60

### *Intimate partner violence*

The survey data collected on IPV within the most recent 12 months (with the latest/current husband) were transformed into the following variables:

- Moderate physical violence: had the husband ever pushed, shaken, or thrown something; ever slapped; ever punched with a fist or something harmful; ever kicked or dragged.
- Severe physical violence: had the husband ever tried to choke or burn; ever threatened with a knife/gun or other weapon; ever attacked with a knife/gun or other weapon.
- Sexual violence: had the husband ever physically forced sex when not wanted.
- Any violence: having been exposed to at least one of the types of IPV defined above.

All IPV variables measured spousal violence with a shortened and modified Conflict Tactics Scale (CTS) [22].

### *Microfinance programs*

Microfinance program membership was coded for respondents who belonged to any of the following organizations: Grameen Bank, BRDB, BRAC, ASHA, PROSHIKA, or any microcredit organization. These are the best-known and popular government-approved organizations providing microfinance credit.

### *Spousal equity*

Household decision making was used as a proxy measure for gender equity in family relations.

Specifically, spousal equity was measured through two variables:



1  
2  
3 Household decision making on own health issues: respondent alone; jointly by respondent and  
4  
5 her husband; respondent and other family members; respondent's husband; someone else in  
6  
7 the family.  
8  
9

10 Household decision making in household purchase issues: respondent alone; jointly by  
11  
12 respondent and her husband; respondent and other family members; respondent's husband;  
13  
14 someone else in the family.  
15  
16  
17

18  
19 The sociodemographic variables used in the present study were respondent age (15–19, 20–24,  
20  
21 25–29, 30–34, 35–39, 40–44, and 45–49 years), rural–urban residency, education (no education,  
22  
23 primary school, secondary school, and higher education), religion (Muslim and non-Muslim),  
24  
25 and whether household head was male or female. Economic status was estimated using the  
26  
27 wealth index. This index, which divides populations into five economic quartiles (poorest,  
28  
29 poorer, middle, richer, and richest), is widely used for measuring economic status in developing  
30  
31 countries [23].  
32  
33  
34  
35

### 36 *Statistical analysis*

37  
38 Chi-square tests were used to examine differences in proportions of exposure to IPV (moderate  
39  
40 physical, severe physical, sexual, and any violence) and association between microfinance and  
41  
42 demographic variables (age, residence, education, religion, and wealth index) with Cramer's  $V$  as  
43  
44 a measure of effect size. Odds ratios (OR) were calculated to indicate the increase in exposure to  
45  
46 IPV associated with membership in microfinance programs compared with non-membership. For  
47  
48 analysis of interaction effects between spousal equity and microfinance programs in relation to  
49  
50 the sociodemographic variables found associated with IPV, the categories used for the household  
51  
52 decision-making variables were re-coded to woman deciding (decision was made by respondent  
53  
54  
55  
56  
57  
58  
59  
60

1  
2  
3 alone, jointly by respondent and her husband, or by respondent and other family members) and  
4  
5 others deciding (decision was made by respondent's husband or by someone else in the family).  
6

7  
8 IBM SPSS Statistics Version 20 was used for all statistical analyses.  
9

### 10 11 12 *Ethical considerations*

13  
14  
15 Ethical approval for the survey was obtained from the Institutional Review Board of Opinion  
16  
17 Research Corporation (ORC), Macro International Incorporated. Informed consent was obtained  
18  
19 from the participants before the start of the survey; the right to withdraw and guarantee of  
20  
21 privacy was emphasized to the respondents throughout the survey. The field workers received  
22  
23 specific training and support to deal with issues such as domestic violence. The standards on  
24  
25 ethical and safety recommendations for research on domestic violence, which are set by the  
26  
27 World Health Organization (WHO), were strictly adhered to. The WHO recommendations aim  
28  
29 toward ensuring women's safety while maximizing disclosure of actual violence [24].  
30  
31  
32  
33  
34  
35

### 36 **Results**

37  
38  
39  
40  
41 Among 11,178 eligible women, 10,996 (98.4%) were interviewed; 4465 (41%) of the primary  
42  
43 survey participants responded to the IPV-related questions (Fig. 1). Respondents to these  
44  
45 questions were more frequently members of microfinance programmes (39%), compared with  
46  
47 non-respondents (35%) (Table 1). It was also found that, among those who responded to the IPV  
48  
49 questions, microfinance program membership was slightly more common among rural women  
50  
51 and women from households with a male head compared with non-responders.  
52  
53  
54

55 **Insert Table 1 about here**  
56  
57  
58  
59  
60

1  
2  
3  
4  
5  
6 Fifty-one percent ( $n=2275$  of 4465) of the women who responded to the IPV questions had been  
7  
8 victims of some form of domestic violence (Table 2). The specific exposures reported were 48%  
9  
10 for moderate physical violence, 16% for severe physical violence, and 11% for sexual violence.  
11  
12 Forty-nine percent of the women had not been exposed to any IPV. Having no formal education  
13  
14 and belonging to the poorest group, according to the wealth index, were the sociodemographic  
15  
16 risk factors most strongly associated with exposure to IPV. Rural residents had a slightly  
17  
18 increased proportional rate of exposure to physical and sexual violence, and Muslim women  
19  
20 were more exposed to IPV than their non-Muslim peers.  
21  
22  
23  
24  
25  
26

27 **Insert Table 2 about here**  
28  
29  
30

31  
32 For women with secondary school or higher education, microfinance program membership was  
33  
34 associated with a two- or three fold increase in exposure to IPV, respectively (Table 3).  
35

36 Similarly, women at the two wealthiest levels of the wealth index showed a twofold increase in  
37  
38 exposure to IPV associated with program membership. The least educated and poorest groups  
39  
40 showed no change in IPV exposure associated with microfinance programs. Sexual violence did  
41  
42 not show any statistically significant increase with microfinance activities.  
43  
44  
45  
46  
47

48 **Insert Table 3 about here**  
49  
50  
51  
52

53 The detailed analyses of interaction effects showed that only formally educated women, who  
54  
55 were more equal with their spouses in their family relationships, experienced more IPV by  
56  
57  
58  
59  
60

1  
2  
3 membership in microfinance programs (Table 4). Women participating in decision making about  
4 management of their own health issues and who had a higher formal education than primary  
5 school were between two to three times more exposed to spousal violence when they were  
6 members of microfinance programs. Among these women, those with the highest formal  
7 education were at more than four times higher risk of sexual violence when associated with  
8 microfinance than when not. No increase in IPV risk was observed for women who were not  
9 involved in decision making about management of their own health issues. In addition, using  
10 decision making on household purchases as a proxy for spousal equity, the women with formal  
11 education experienced increased spousal violence when they were also members of microfinance  
12 programs. No such increase in IPV risk associated with microfinance was observed for women  
13 who were not involved in decision making on household purchases.  
14  
15  
16  
17  
18  
19  
20  
21  
22  
23  
24  
25  
26  
27  
28  
29  
30  
31

32 **Insert Table 4 about here**  
33  
34  
35

## 36 **Discussion**

37  
38  
39  
40

41 Several previous epidemiological studies of IPV [13–15], including an early study from rural  
42 Bangladesh [9], have reported a protective effect of microfinance programs. Our results do not  
43 support the assertion that microfinance generally reduces IPV. The results from our study  
44 showed a pattern where microfinance was associated with increased exposure to IPV among  
45 women with a formal education. However, educated program members were less exposed to IPV  
46 if they were not involved in the family affairs, i.e. no increase in IPV was observed in  
47 households where the wife was associated with microfinance but excluded from the day-to-day  
48  
49  
50  
51  
52  
53  
54  
55  
56  
57  
58  
59  
60

1  
2  
3 decision making. Sexual violence was less clearly associated with different risk of IPV when  
4 being part of a microfinance program. This finding of different patterns between sexual and  
5  
6 physical violence hypothesize existing differences in the causes of sexual and physical IPV,  
7  
8 which is in accordance with several previous studies from Bangladesh [5, 25–30].  
9  
10  
11

12  
13  
14  
15 There are several limitations that have to be taken into account when interpreting the current  
16  
17 results. The study used a cross-sectional design, implying that the results only can be used to  
18  
19 hypothesize about IPV causes. However, the observation that formally educated microfinance  
20  
21 program members who participated in household decision making were more exposed to IPV  
22  
23 suggests that either disagreements between spouses related to the management of household  
24  
25 resources were linked to IPV, or that formally educated women who participate in household  
26  
27 decision making are more able to free themselves from an established IPV pattern by  
28  
29 participating in microfinance programs. The current study does not include dowry demands.  
30  
31  
32 Therefore, possible effects of dowry demands and/or microfinance plans on IPV are not explored  
33  
34 here. Nonetheless, a recent study reports that dowry is uncommon among educated women in  
35  
36 Bangladesh [31]. Other mechanisms linking microfinance with IPV are more likely to explain  
37  
38 these association patterns. Even though the formally educated women were generally less  
39  
40 exposed to IPV, microfinanced loans may have caused more economic stress in this group due to  
41  
42 larger business projects and multiple loans. It is possible that solidarity circles, which extend  
43  
44 informal economic reciprocity beyond the family to the local community, were accepted as  
45  
46 security for the microfinance loans among the poor. In contrast, formal security limited to the  
47  
48 family may have been more common among the more wealthy and educated women. Such  
49  
50 circumstances could explain why microfinance in the educated group reported more IPV  
51  
52  
53  
54  
55  
56  
57  
58  
59  
60

1  
2  
3 exposure in interaction with non-financial empowerment, i.e. by shared household decision  
4 making [9]. Hence, there may have been fewer conflicts in households where the wife was not  
5 empowered mainly because husbands managed the loans in these households single-handedly. In  
6  
7  
8  
9  
10 addition, data on when the women joined the microfinance programs were not collected in the  
11  
12 study. Thus, associations between the microfinance program membership phase and occurrence  
13  
14 of IPV could not be examined. Thus, further research is needed on the mechanisms by which  
15  
16 repayment of microfinance loans is associated with IPV among empowered women in  
17  
18  
19  
20  
21  
22  
23  
24  
25  
26  
27  
28  
29  
30  
31  
32  
33  
34  
35  
36  
37  
38  
39  
40  
41  
42  
43  
44  
45  
46  
47  
48  
49  
50  
51  
52  
53  
54  
55  
56  
57  
58  
59  
60

Even though the initial survey response rate was 98%, the rate of response to the IPV-related questions was only 39%. However, we found only minor differences in relation to sociodemographic variables between responders and non-responders. Moreover, response bias may have resulted from recall bias or deliberate unwillingness to disclose a history of domestic violence. Participants may have been reluctant to disclose their own victimization of IPV, given the sensitive nature of the questions and the strong social stigma. Under-reporting of events in association with the IPV-related questions may therefore have reduced the primary rates. Nonetheless, we do not expect that such under-reporting influenced the analyses of associations between IPV, microfinance program membership, spousal equity, and the woman's educational level. The analysis included numerous statistical tests but, with corrections for multiple comparisons, the family-wise error rate was maintained at a reasonable level. The effect sizes were low to moderate. The results are relevant at a group level, but another research design is needed to examine the factors that identify individual women at different risks for IPV.

1  
2  
3 In accordance with previous research [3, 5, 9], about every second woman in our study reported  
4 having been a victim of IPV. There is thus ample evidence that women in Bangladesh and other  
5 countries in the Indian subcontinent suffer from a heavy burden of IPV, and the identification of  
6 predisposing factors as well as countermeasures has recently been called for in this region [25].  
7  
8 We found that microfinance program membership was not associated with a decreased level of  
9 IPV in any population strata. Membership was associated with higher IPV exposure among  
10 women with a formal education. However, our findings should be interpreted in light of the  
11 limitations of the study (i.e. a cross-sectional design was used and there was a considerable non-  
12 response to the IPV-related survey questions). Other studies in different countries have indicated  
13 that association with microfinance reduces IPV exposure [13–15]. The findings in this study  
14 raise the question that association with microfinance are not always associated with reduced  
15 levels of IPV. Therefore additional prospective studies in different settings are warranted to  
16 study mechanisms by which economic stress might be a contributing factor for IPV associated  
17 with microfinance, as well as on the effects resulting from interactions between economic and  
18 non-economic empowerment.  
19  
20  
21  
22  
23  
24  
25  
26  
27  
28  
29  
30  
31  
32  
33  
34  
35  
36  
37  
38  
39  
40

41 The results of this study still have policy implications. Microfinance programs in Bangladesh  
42 make claims in their marketing campaigns about social responsibility. These organizations can  
43 therefore be expected to act with particular social conscientiousness. According to the results of  
44 this study, microfinance firms should be aware that program membership may increase IPV  
45 exposure among women belonging to risk groups. Alternatively, microfinance firms should be  
46 aware that microfinance program membership among formally educated women might reflect an  
47 increased exposure of IPV. However, before demands to provide information about risk for IPV  
48  
49  
50  
51  
52  
53  
54  
55  
56  
57  
58  
59  
60

1  
2  
3 can be put on microfinance firms, the identification of risk groups should be confirmed in  
4  
5  
6 prospective studies.  
7  
8  
9

10 **Conflict of interest:** None declared.  
11

12 **Acknowledgement:** The authors are grateful to the field staff and management of Measure DHS  
13  
14 for procuring data and permission to use them.  
15  
16  
17  
18  
19

## 20 **References**

21  
22  
23

- 24 1. WHO. *World report on violence and health*. Geneva, Switzerland: World Health  
25 Organization, 2002.  
26
- 27 2. Diop-Sidibe N, Campbell J, Becker S **Domestic violence against women in Egypt**. *Soc*  
28 *Sci Med* 2006, **62**: 1260–1277.  
29
- 30 3. WHO. *Multi-country study on women's health and domestic violence against women*.  
31 Geneva, Switzerland: World Health Organization, 2005.  
32
- 33 4. Kim JC, Watts CH, Hargreaves JR, Ndhlovu LX, Phetla G, et al. **Understanding the**  
34 **impact of a microfinance-based intervention on women's empowerment and the**  
35 **reduction of intimate partner violence in South Africa**. *Am J Public Health* 2007, **97**:  
36 1794–1802.  
37
- 38 5. Dalal K, Rahman F, Jansson B. **Wife abuse in rural Bangladesh**. *J Biosoc Sci* 2009, **41**:  
39 561–573.  
40
- 41 6. Khan ME, Ubaidur R, Hossain SMI. **Violence against women and its impact on**  
42 **women's lives – some observations from Bangladesh**. *J Fam Welfare* 2001, **46**: 12–24.  
43  
44  
45  
46  
47  
48  
49  
50  
51  
52  
53  
54  
55  
56  
57  
58  
59  
60



- 1  
2  
3  
4  
5  
6  
7  
8  
9  
10  
11  
12  
13  
14  
15  
16  
17  
18  
19  
20  
21  
22  
23  
24  
25  
26  
27  
28  
29  
30  
31  
32  
33  
34  
35  
36  
37  
38  
39  
40  
41  
42  
43  
44  
45  
46  
47  
48  
49  
50  
51  
52  
53  
54  
55  
56  
57  
58  
59  
60
7. Bates LM, Schuler SR, Islam F, Islam MK. **Socioeconomic factors and processes associated with domestic violence in rural Bangladesh.** *Int Fam Plan Perspect* 2004, **30**: 190–199.
8. Commission on Social Determinants of Health. *Closing the gap in a generation: health equity through action on the social determinants of health. Final report.* Geneva, Switzerland: World Health Organization, 2008.
9. Schuler SR, Hashemi SM. **Credit programmes, women’s empowerment and contraceptive use in rural Bangladesh.** *Stud Fam Plan* 1994, **25**: 65–76.
10. Hashemi SM, Schuler SR, Riley AP. **Rural credit programmes and women’s empowerment in Bangladesh.** *World Dev* 1996, **24**: 635–653.
11. Khandker SR. *Fighting poverty with microcredit: experience in Bangladesh.* New York: Oxford University Press, 1998.
12. Schuler S, Hashemi S, Riley A. **The influence of women’s changing roles and status in Bangladesh’s fertility transition: evidence from a study of credit programmes and contraceptive use.** *World Dev* 1997, **25**: 563–575.
13. Mayoux L. **Women’s empowerment and microfinance programmes: strategies for increasing impact.** *Dev Pract* 198, **8**: 235–241.
14. UNFPA Microcredit Summit Campaign . *From microfinance to macro change: integrating health education and microfinance to empower women and reduce poverty.* New York: Microcredit Summit Campaign and the United Nations Population Fund, 2006.

- 1  
2  
3  
4  
5  
6  
7  
8  
9  
10  
11  
12  
13  
14  
15  
16  
17  
18  
19  
20  
21  
22  
23  
24  
25  
26  
27  
28  
29  
30  
31  
32  
33  
34  
35  
36  
37  
38  
39  
40  
41  
42  
43  
44  
45  
46  
47  
48  
49  
50  
51  
52  
53  
54  
55  
56  
57  
58  
59  
60
15. Ahmed SM. **Intimate partner violence against women: experiences from a woman-focused development programme in Matlab, Bangladesh.** *J Health Popul Nutr* 2006, **23**: 95–101.
16. Pronyk PM, Hargreaves JR, Kim JC, Morison LA, Phetla G, et al. **(Effect of a structural intervention for the prevention of intimate-partner violence and HIV in rural South Africa: a cluster randomized trial.** *Lancet* 2006, **368**: 1973–1983.
17. Schuler SR, Hashemi SM, Badal SH. **Men's violence against women in rural Bangladesh: undermined or exacerbated by microcredit programmes?** *Dev Pract* 1998, **8**: 148–157.
18. The Nobel Peace Prize for 2006. Available: [http://nobelprize.org/nobel\\_prizes/peace/laureates/2006/press.html](http://nobelprize.org/nobel_prizes/peace/laureates/2006/press.html). Accessed 10 October 2012.
19. Koenig, MA, Ahmed S, Hossain MB, Mozumder ABMKA. **Women's status and domestic violence in rural Bangladesh: individual- and community-level effects.** *Demography* 2003, **40**: 269–288.
20. STROBE statement. Available: <http://www.strobe-statement.org/>. Accessed 13 January 2012.
21. Kishor S, Johnson K. *Profiling domestic violence: a multi-country study*. Calverton, MD: ORC Macro, 2004.
22. Strauss M. *Measuring intra-family conflict and violence: the conflict tactics (CT) scales*. In: Strauss MA, Gelles RJ, editors. *Physical violence in American families: risk factors and adaptations to violence in 8145 families*. New Brunswick: Transaction Publishers, 1998: 29–47.

- 1  
2  
3  
4  
5  
6  
7  
8  
9  
10  
11  
12  
13  
14  
15  
16  
17  
18  
19  
20  
21  
22  
23  
24  
25  
26  
27  
28  
29  
30  
31  
32  
33  
34  
35  
36  
37  
38  
39  
40  
41  
42  
43  
44  
45  
46  
47  
48  
49  
50  
51  
52  
53  
54  
55  
56  
57  
58  
59  
60
23. Rutstein SO, Johnson K. *The DHS wealth index*. DHS comparative reports no. 6. Calverton, MD: ORC Macro, 2004.
24. WHO. *Putting women first: ethical and safety recommendations for research on domestic violence against women*. Geneva, Switzerland: World Health Organization, 2001.
25. Johnston HB, Naved RT. **Spousal violence in Bangladesh: a call for a public-health response.** *J Health Popul Nutr* 2008, **26**: 366–377.
26. Schuler S, Hashemi S, Riley P, Akhter S. **Credit programs, patriarchy and men's violence against women in rural Bangladesh.** *Soc Sci Med* 1996, **43**: 1729–1742.
27. Bhuiya A, Sharmin T, Hanifi SMA. **Nature of domestic violence against women in a rural area of Bangladesh: implication for preventive interventions.** 2003, **21**: 48–54.
28. Silverman JG, Decker MR, Kapur NA, Gupta J, Raj A. **Violence against wives, sexual risk and sexually transmitted infection among Bangladeshi men.** *Sex Transm Infect* 2007, **83**: 211–215.
29. Naved RT, Azim S, Bhuiya A, Persson LA. **Physical violence by husbands: magnitude, disclosure and help-seeking behavior of women in Bangladesh.** *Soc Sci Med* 2006, **62**: 2917–2929.
30. Salam A, Alim A, Noguchi T. **Spousal abuse against women and its consequences on reproductive health: a study in the urban slums in Bangladesh.** *Matern Child Health J* 2006, **10**: 83–94.
31. Naved RT, Rimi NA, Jahan S, Lindmark G. **Paramedic-conducted mental health counselling for abused women in rural Bangladesh: an evaluation from the perspective of participants.** *J Health Popul Nutr* 2006, **27**: 477–491.

1  
2  
3  
4  
5  
6  
7  
8  
9  
10  
11  
12  
13  
14  
15  
16  
17  
18  
19  
20  
21  
22  
23  
24  
25  
26  
27  
28  
29  
30  
31  
32  
33  
34  
35  
36  
37  
38  
39  
40  
41  
42  
43  
44  
45  
46  
47  
48  
49  
50  
51  
52  
53  
54  
55  
56  
57  
58  
59  
60

**Figure 1. Study participation displayed according to the STROBE statement.**

For peer review only

**Table 1.** Prevalence of membership in microfinance programs among the survey participants divided by response and non-response to the intimate partner violence (IPV) question and displayed by age, residence, education, religion, sex of household head, and household wealth index. Chi-2 tests test for differences in distribution of microfinance program membership between the respondents and the non-respondents to IPV questions.

|                       | Respondents to IPV questions |     | Non-respondents to IPV questions |    | Total |    |
|-----------------------|------------------------------|-----|----------------------------------|----|-------|----|
|                       | N                            | %   | n                                | %  | n     | %  |
| <b>Age</b>            |                              |     |                                  |    |       |    |
| 15-19                 | 462                          | 29  | 886                              | 23 | 1348  | 26 |
| 20-24                 | 850                          | 36  | 1323                             | 31 | 2174  | 33 |
| 25-29                 | 866                          | 43  | 1068                             | 37 | 1935  | 40 |
| 30-34                 | 742                          | 40  | 918                              | 39 | 1661  | 39 |
| 35-39                 | 701                          | 41  | 895                              | 41 | 1596  | 41 |
| 40-44                 | 462                          | 42  | 756                              | 38 | 1218  | 40 |
| 45-49                 | 380                          | 36  | 684                              | 35 | 1064  | 35 |
| <b>Residence</b>      |                              |     |                                  |    |       |    |
| Urban                 | 1688                         | 36  | 2482                             | 33 | 4151  | 34 |
| Rural                 | 2795                         | 40* | 4048                             | 36 | 6845  | 37 |
| <b>Education</b>      |                              |     |                                  |    |       |    |
| No education          | 1494                         | 45  | 2030                             | 40 | 3525  | 41 |
| Primary               | 1348                         | 44  | 1920                             | 40 | 3268  | 42 |
| Secondary             | 1292                         | 31  | 2051                             | 29 | 3345  | 30 |
| Higher                | 327                          | 19  | 528                              | 19 | 855   | 19 |
| <b>Religion</b>       |                              |     |                                  |    |       |    |
| Muslim                | 4033                         | 38  | 5889                             | 34 | 9924  | 36 |
| Non-Muslim            | 430                          | 48  | 641                              | 41 | 1072  | 44 |
| <b>Household head</b> |                              |     |                                  |    |       |    |
| Female                | 505                          | 25  | 802                              | 26 | 1308  | 25 |
| Male                  | 3958                         | 40* | 5728                             | 36 | 9688  | 37 |
| <b>Wealth index</b>   |                              |     |                                  |    |       |    |
| Poorest               | 804                          | 47  | 971                              | 41 | 1175  | 43 |
| Poorer                | 856                          | 45  | 1138                             | 42 | 1995  | 43 |
| Middle                | 849                          | 42  | 1246                             | 40 | 2095  | 41 |
| Richer                | 855                          | 41  | 1345                             | 37 | 2201  | 38 |
| Richest               | 1099                         | 23  | 1830                             | 22 | 2930  | 22 |
| Total                 | 4465                         | 39* | 6531                             | 35 | 10993 | 36 |

Significance for chi-square test is denoted by \* ( $p < .05$ , Bonferroni corrected for 22 comparisons in each column).

1  
2  
3  
4  
5  
6  
7  
8  
9  
10  
11  
12  
13  
14  
15  
16  
17  
18  
19  
20  
21  
22  
23  
24  
25  
26  
27  
28  
29  
30  
31  
32  
33  
34  
35  
36  
37  
38  
39  
40  
41  
42  
43  
44  
45  
46  
47  
48  
49

**Table 2.** Prevalence of intimate partner violence (IPV) in the final study population (*n* = 4467) displayed by age, residence, education, religion, sex of household head, and household wealth index. Chi-2 tests are presented for differences in distributions related to each of the variables age, residence, education, religion, household head and wealth index

|                       | N    | Moderate physical violence<br>% | Severe physical violence<br>%   | Sexual violence<br>%            | Any violence<br>%               |
|-----------------------|------|---------------------------------|---------------------------------|---------------------------------|---------------------------------|
| <b>Age</b>            |      |                                 |                                 |                                 |                                 |
| 15-19                 | 462  | 42                              | 14                              | 14+                             | 46                              |
| 20-24                 | 851  | 47                              | 14                              | 15+                             | 50                              |
| 25-29                 | 867  | 49                              | 17                              | 12                              | 52                              |
| 30-34                 | 743  | 51                              | 18                              | 11                              | 55                              |
| 35-39                 | 701  | 48                              | 17                              | 9                               | 50                              |
| 40-44                 | 462  | 49                              | 19                              | 7-                              | 50                              |
| 45-49                 | 381  | 50                              | 17                              | 5-                              | 51                              |
| <b>Residence</b>      |      |                                 |                                 | <i>p</i> < .05, <i>V</i> = .04  | <i>p</i> < .01, <i>V</i> = .05  |
| Urban                 | 1669 | 46                              | 16                              | 9-                              | 47-                             |
| Rural                 | 2798 | 49                              | 17                              | 12                              | 53                              |
| <b>Education</b>      |      | <i>p</i> < .001, <i>V</i> = .22 | <i>p</i> < .001, <i>V</i> = .17 |                                 | <i>p</i> < .001, <i>V</i> = .21 |
| No education          | 1496 | 58+                             | 23+                             | 12                              | 60+                             |
| Primary               | 1349 | 52+                             | 18                              | 12                              | 56+                             |
| Secondary             | 1293 | 39-                             | 10-                             | 9                               | 42-                             |
| Higher                | 327  | 20-                             | 1-                              | 8                               | 25-                             |
| <b>Religion</b>       |      | <i>p</i> < .001, <i>V</i> = .06 | <i>p</i> < .01, <i>V</i> = .05  |                                 | <i>p</i> < .001, <i>V</i> = .07 |
| Muslim                | 4036 | 49                              | 17                              | 11                              | 52                              |
| Non-Muslim            | 430  | 38-                             | 10-                             | 6-                              | 40-                             |
| <b>Household head</b> |      |                                 |                                 |                                 |                                 |
| Female                | 506  | 44                              | 16                              | 11                              | 47                              |
| Male                  | 3961 | 48                              | 16                              | 11                              | 52                              |
| <b>Wealth Index</b>   |      | <i>p</i> < .001, <i>V</i> = .18 | <i>p</i> < .001, <i>V</i> = .14 | <i>p</i> < .001, <i>V</i> = .11 | <i>p</i> < .001, <i>V</i> = .19 |
| Poorest               | 804  | 58+                             | 22+                             | 16+                             | 62+                             |
| Poorer                | 857  | 53+                             | 19                              | 13                              | 57+                             |
| Middle                | 850  | 53+                             | 18                              | 11                              | 56+                             |
| Richer                | 856  | 46                              | 17                              | 10                              | 49                              |
| Richest               | 1099 | 34-                             | 8-                              | 6-                              | 36-                             |
| Total                 | 4467 | 48                              | 16                              | 11                              | 51                              |

Significant Chi-2 tests (*p* < .05, Bonferroni corrected for 6 tests per column yielding *p* < .0083) including at least one standardized residual >2 (indicated by +) or <-2 (indicated by -) are reported by *p* values and effect size *V* (Cramer's *V*).

**Table 3** Associations between intimate partner violence (IPV) and membership in microfinance (MF) programs in different sociodemographic strata. Significant Chi2-tests for exposure to IPV and belonging to MF programs are reported by their effect sizes Cramer's *V*. Odds ratios (OR) indicate increased risk IPV for women than belonging to MF programs compared with women that did not belong to such programs. Only significant tests (*p* < .05, Bonferroni corrected for 80 tests yielding *p* < .000625) including at least one standardized residual >2 (indicated by +) or <-2 (indicated by -) are reported as significant

|                     | N    | Moderate Physical Violence |        |              |        | <i>V</i> (OR) | Severe Physical Violence |        |              |        | <i>V</i> (OR) |
|---------------------|------|----------------------------|--------|--------------|--------|---------------|--------------------------|--------|--------------|--------|---------------|
|                     |      | No Microfinance            |        | Microfinance |        |               | No Microfinance          |        | Microfinance |        |               |
|                     |      | IPV                        | No IPV | IPV          | No IPV |               | IPV                      | No IPV | IPV          | No IPV |               |
| <b>Age</b>          |      |                            |        |              |        |               |                          |        |              |        |               |
| 15-19               | 462  | 123                        | 204    | 72           | 63     |               | 47                       | 280    | 17           | 118    |               |
| 20-24               | 850  | 218-                       | 327+   | 179+         | 126-   | .18 (2.1)     | 58-                      | 487    | 62+          | 243    | .13 (2.1)     |
| 25-29               | 866  | 216                        | 279    | 205          | 166    |               | 73                       | 422    | 75           | 296    |               |
| 30-34               | 742  | 207                        | 238    | 174          | 123    |               | 68                       | 377    | 63           | 234    |               |
| 35-39               | 701  | 173                        | 243    | 160+         | 125-   | .14 (1.8)     | 55                       | 361    | 62           | 223    |               |
| 40-44               | 462  | 114                        | 156    | 114+         | 78-    | .17 (2.0)     | 39                       | 231    | 47           | 145    |               |
| 45-49               | 380  | 114                        | 129    | 74           | 63     |               | 37                       | 206    | 27           | 110    |               |
| <b>Residence</b>    |      |                            |        |              |        |               |                          |        |              |        |               |
| Urban               | 1668 | 418-                       | 645+   | 344+         | 261-   | .17 (2.0)     | 138-                     | 925    | 120+         | 485    | .09 (1.7)     |
| Rural               | 2795 | 747-                       | 931+   | 634+         | 483-   | .12 (1.6)     | 239-                     | 1439   | 233+         | 884    | .09 (1.6)     |
| <b>Education</b>    |      |                            |        |              |        |               |                          |        |              |        |               |
| No education        | 1494 | 463                        | 363    | 402          | 266    |               | 181                      | 645    | 166          | 502    |               |
| Primary             | 1348 | 356                        | 400+   | 348+         | 244-   | .12 (1.6)     | 115                      | 641    | 126          | 466    |               |
| Secondary           | 1292 | 302-                       | 591+   | 206+         | 193-   | .17 (2.1)     | 70                       | 823    | 54           | 345    |               |
| Higher              | 327  | 44                         | 220    | 22           | 41     |               | 11                       | 253    | 7            | 56     |               |
| <b>Religion</b>     |      |                            |        |              |        |               |                          |        |              |        |               |
| Muslim              | 4033 | 1093-                      | 1425+  | 885+         | 630-   | .15 (1.8)     | 357-                     | 2161   | 329+         | 1186-  | .10 (1.7)     |
| Non-Muslim          | 430  | 72                         | 151    | 93           | 114    |               | 20                       | 203    | 24           | 183    |               |
| <b>Wealth Index</b> |      |                            |        |              |        |               |                          |        |              |        |               |
| Poorest             | 804  | 249                        | 177    | 219          | 159    |               | 96                       | 330    | 84           | 294    |               |
| Poorer              | 856  | 234                        | 240    | 221          | 161    |               | 84                       | 390    | 77           | 305    |               |
| Middle              | 849  | 237                        | 251    | 217          | 144    |               | 77                       | 411    | 76           | 285    |               |
| Richer              | 855  | 191-                       | 311+   | 206+         | 147-   | .20 (2.3)     | 60-                      | 442    | 89+          | 264    | .17 (2.5)     |
| Richest             | 1099 | 254                        | 597    | 115+         | 133-   | .15 (2.0)     | 60                       | 791    | 27           | 221    |               |
|                     |      | <b>Sexual Violence</b>     |        |              |        |               | <b>Any Violence</b>      |        |              |        |               |
|                     |      | No Microfinance            |        | Microfinance |        | <i>V</i> (OR) | No Microfinance          |        | Microfinance |        | <i>V</i> (OR) |
|                     | N    | IPV                        | No IPV | IPV          | No IPV |               | IPV                      | No IPV | IPV          | No IPV |               |
| <b>Age</b>          |      |                            |        |              |        |               |                          |        |              |        |               |
| 15-19               | 462  | 52                         | 275    | 15           | 120    |               | 139                      | 188    | 75           | 60     |               |
| 20-24               | 850  | 83                         | 462    | 42           | 263    |               | 245                      | 300    | 184+         | 121-   | .15 (1.9)     |
| 25-29               | 866  | 47                         | 448    | 54           | 317    |               | 231                      | 264    | 221+         | 150-   | .13 (1.7)     |
| 30-34               | 742  | 42                         | 403    | 34           | 263    |               | 223                      | 222    | 181          | 116    |               |
| 35-39               | 701  | 29                         | 387    | 35           | 250    |               | 183                      | 233    | 164          | 121    |               |
| 40-44               | 462  | 19                         | 251    | 12           | 180    |               | 117                      | 153    | 116          | 76-    | .17 (2.0)     |
| 45-49               | 380  | 14                         | 229    | 5            | 132    |               | 120                      | 123    | 75           | 62     |               |
| <b>Residence</b>    |      |                            |        |              |        |               |                          |        |              |        |               |
| Urban               | 1668 | 90                         | 973    | 64           | 541    |               | 436-                     | 627+   | 354+         | 251-   | .17 (2.0)     |
| Rural               | 2795 | 196                        | 1482   | 133          | 984    |               | 822-                     | 856+   | 662+         | 455-   | .10 (1.5)     |
| <b>Education</b>    |      |                            |        |              |        |               |                          |        |              |        |               |
| No education        | 1494 | 101                        | 725    | 76           | 592    |               | 486                      | 340    | 415          | 253    |               |
| Primary             | 1348 | 96                         | 660    | 67           | 525    |               | 389                      | 367    | 359          | 233    |               |
| Secondary           | 1292 | 74                         | 819    | 43           | 356    |               | 330-                     | 563+   | 215+         | 184-   | .16 (2.0)     |
| Higher              | 327  | 15                         | 249    | 11           | 52     |               | 53                       | 211    | 27+          | 36     | .21 (3.0)     |
| <b>Religion</b>     |      |                            |        |              |        |               |                          |        |              |        |               |
| Muslim              | 4033 | 276                        | 2242   | 183          | 1332   |               | 1183-                    | 1335+  | 919+         | 596-   | .13 (1.7)     |
| Non-Muslim          | 430  | 10                         | 213    | 14           | 193    |               | 75                       | 148    | 97           | 110    |               |
| <b>Wealth Index</b> |      |                            |        |              |        |               |                          |        |              |        |               |
| Poorest             | 804  | 79                         | 347    | 52           | 326    |               | 271                      | 155    | 229          | 149    |               |
| Poorer              | 856  | 62                         | 412    | 46           | 336    |               | 255                      | 219    | 230          | 152    |               |
| Middle              | 849  | 48                         | 440    | 44           | 317    |               | 254                      | 234    | 224          | 137    |               |
| Richer              | 855  | 45                         | 457    | 40           | 313    |               | 203-                     | 299+   | 213+         | 140-   | .20 (2.2)     |
| Richest             | 1099 | 52                         | 799    | 15           | 233    |               | 275                      | 576    | 120+         | 128-   | .14 (2.0)     |

1  
2  
3  
4  
5  
6  
7  
8  
9  
10  
11  
12  
13  
14  
15  
16  
17  
18  
19  
20  
21  
22  
23  
24  
25  
26  
27  
28  
29  
30  
31  
32  
33  
34  
35  
36  
37  
38  
39  
40  
41  
42  
43  
44  
45  
46  
47  
48  
49

**Table 4.** Increase in risk of IPV by membership in microfinance programs compared to non-membership displayed with regard to interaction with the woman’s educational level and spousal equity (N=4,467). Spousal equity is estimated by household decision-making policies regarding health issues and daily household purchases. The risk increase is given as odds ratios (OR) with corresponding 95 % confidence intervals.

| IPV risk increase associated with Microfinance program membership |                   |      |                                            |                                          |                                 |                              |
|-------------------------------------------------------------------|-------------------|------|--------------------------------------------|------------------------------------------|---------------------------------|------------------------------|
| Spousal equity                                                    | Woman’s education | N    | Moderate Physical violence<br>OR [95 % CI] | Severe Physical violence<br>OR [95 % CI] | Sexual violence<br>OR [95 % CI] | Any Violence<br>OR [95 % CI] |
| <i>Health decisions</i>                                           |                   |      |                                            |                                          |                                 |                              |
| Woman                                                             | No schooling      | 956  | 1.21 [0.93 1.56]                           | 1.07 [0.79 1.44]                         | 0.88 [0.58 1.32]                | 1.21 [0.93 1.56]             |
|                                                                   | Primary           | 865  | 1.83 [1.39 2.40]                           | 1.65 [1.17 2.33]                         | 0.93 [0.61 1.40]                | 1.83 [1.40 2.41]             |
|                                                                   | Secondary         | 834  | 2.74 [2.03 3.69]                           | 2.06 [1.31 3.24]                         | 1.34 [0.83 2.14]                | 2.67 [1.98 3.61]             |
|                                                                   | Higher            | 255  | 3.20 [1.62 6.34]                           | 2.00 [0.65 6.12]                         | 4.55 [1.85 11.19]               | 3.20 [1.62 6.34]             |
| Other                                                             | No schooling      | 538  | 1.14 [0.81 1.61]                           | 1.42 [0.94 2.14]                         | 1.00 [0.60 1.65]                | 1.13 [0.80 1.59]             |
|                                                                   | Primary           | 483  | 1.26 [0.88 1.81]                           | 1.25 [0.77 2.03]                         | 0.79 [0.45 1.39]                | 1.25 [0.87 1.79]             |
|                                                                   | Secondary         | 458  | 1.23 [0.81 1.86]                           | 1.41 [0.71 2.81]                         | 1.30 [0.63 2.70]                | 1.22 [0.80 1.84]             |
|                                                                   | Higher            | 72   | 1.47 [0.34 6.44]                           | 15.25 [1.24 187.85]                      | -                               | 1.47 [0.34 6.44]             |
| <i>Daily purchase decisions</i>                                   |                   |      |                                            |                                          |                                 |                              |
| Women                                                             | No schooling      | 1034 | 1.11 [0.86 1.42]                           | 1.04 [0.78 1.39]                         | 0.94 [0.62 1.41]                | 1.10 [0.86 1.41]             |
|                                                                   | Primary           | 882  | 1.92 [1.46 2.51]                           | 1.79 [1.26 2.53]                         | 0.89 [0.57 1.37]                | 1.90 [1.45 2.49]             |
|                                                                   | Secondary         | 840  | 2.16 [1.61 2.89]                           | 2.06 [1.32 3.23]                         | 1.34 [0.83 2.14]                | 2.10 [1.57 2.82]             |
|                                                                   | Higher            | 249  | 2.90 [1.44 5.86]                           | 2.80 [0.76 10.32]                        | 4.55 [1.61 12.81]               | 2.90 [1.44 5.86]             |
| Other                                                             | No schooling      | 460  | 1.37 [0.94 2.00]                           | 1.57 [1.01 2.42]                         | 0.95 [0.57 1.58]                | 1.37 [0.94 2.00]             |
|                                                                   | Primary           | 466  | 1.13 [0.78 1.64]                           | 1.07 [0.66 1.75]                         | 0.91 [0.54 1.53]                | 1.14 [0.79 1.65]             |
|                                                                   | Secondary         | 452  | 1.94 [1.26 2.98]                           | 1.28 [0.61 2.68]                         | 1.28 [0.61 2.68]                | 1.91 [1.24 2.94]             |
|                                                                   | Higher            | 78   | 2.28 [0.64 8.06]                           | 3.60 [0.74 17.48]                        | 2.49 [0.55 11.25]               | 2.28 [0.64 8.06]             |



**Figure 1.** Study participation displayed according to the STROBE statement.

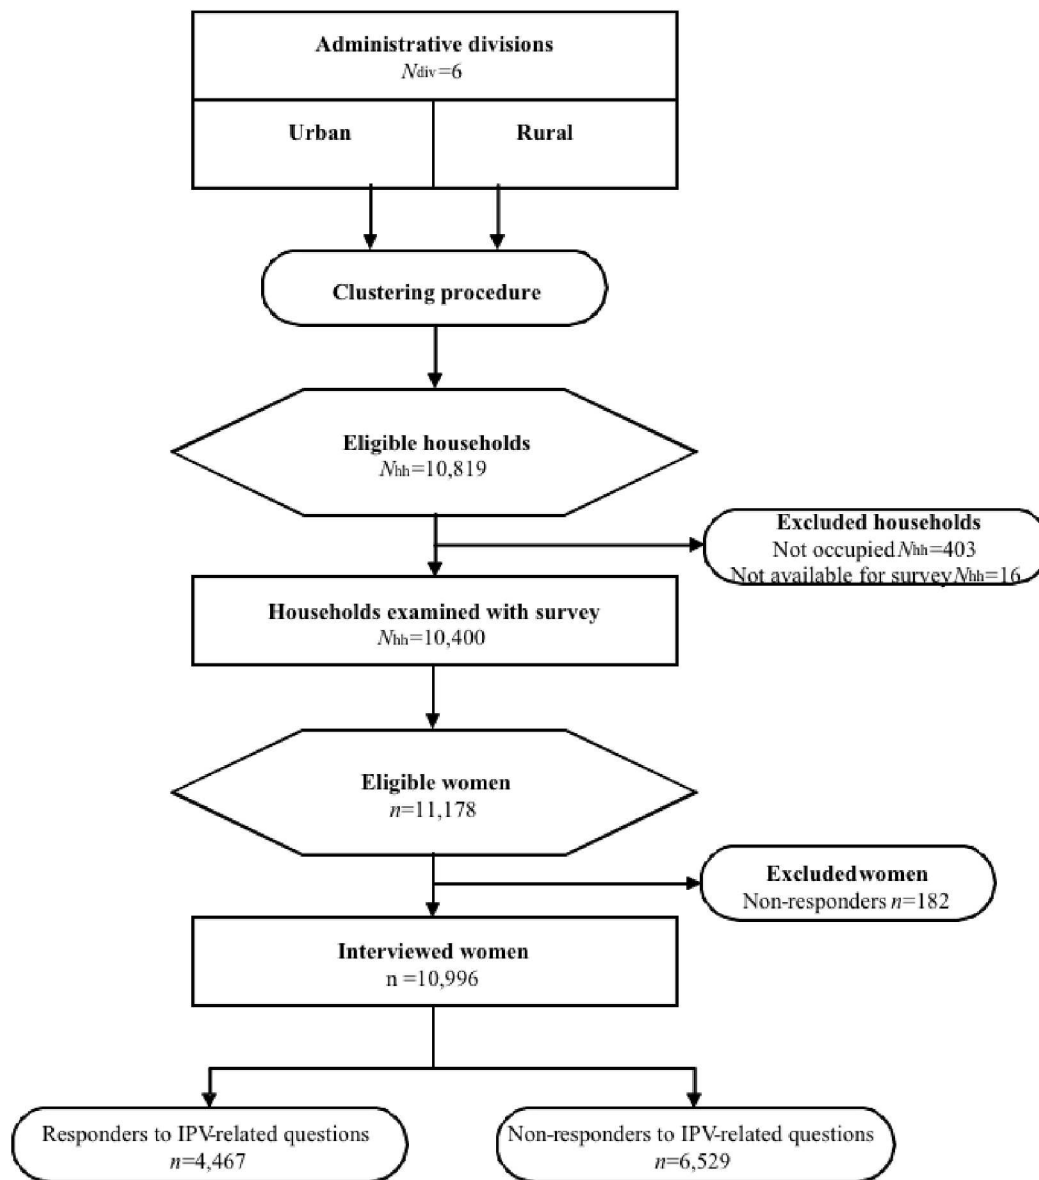



**Interactions between microfinance programs and non-economic empowerment of women associated with intimate partner violence in Bangladesh**

|                                 |                                                                                                                                                                                                                                                                                                                                  |
|---------------------------------|----------------------------------------------------------------------------------------------------------------------------------------------------------------------------------------------------------------------------------------------------------------------------------------------------------------------------------|
| Journal:                        | <i>BMJ Open</i>                                                                                                                                                                                                                                                                                                                  |
| Manuscript ID:                  | bmjopen-2013-002941.R1                                                                                                                                                                                                                                                                                                           |
| Article Type:                   | Research                                                                                                                                                                                                                                                                                                                         |
| Date Submitted by the Author:   | 27-May-2013                                                                                                                                                                                                                                                                                                                      |
| Complete List of Authors:       | Dalal, Assoc. Prof. Koustuv; Örebro University, Director, Centre for Injury Prevention & safety Promotion (CIPSP), School of Health and Medical Sciences<br>Dahlstrom, Orjan; Linköping University, Department of Medical and Health Sciences<br>Timpka, Toomas; Linköping University, Department of Medical and Health Sciences |
| <b>Primary Subject Heading</b>: | Public health                                                                                                                                                                                                                                                                                                                    |
| Secondary Subject Heading:      | Epidemiology, Global health, Health economics                                                                                                                                                                                                                                                                                    |
| Keywords:                       | PUBLIC HEALTH, Health economics < HEALTH SERVICES ADMINISTRATION & MANAGEMENT, EPIDEMIOLOGY                                                                                                                                                                                                                                      |
|                                 |                                                                                                                                                                                                                                                                                                                                  |

SCHOLARONE™  
Manuscripts

1  
2  
3  
4 Interactions between microfinance programs and non-economic  
5 empowerment of women associated with intimate partner  
6 violence in Bangladesh  
7  
8  
9

10  
11  
12 Koustuv Dalal<sup>1\*</sup>, Örjan Dahlstöm<sup>2,3</sup>, Toomas Timpka<sup>2</sup>  
13

14  
15  
16 1 School of Health and Medical Sciences, Örebro University, Örebro, Sweden  
17

18  
19 2 Department of Medical and Health Sciences, Linköping University, Linköping, Sweden  
20

21  
22 3 Linnaeus Centre HEAD, Swedish Institute for Disability Research, Department of Behavioural  
23  
24 Sciences and Learning, Linköping University, Sweden  
25  
26  
27  
28  
29

30  
31 **Running title:** Microfinance and violence against women (2807 words)  
32

33  
34 \* Corresponding author: Koustuv Dalal, PhD, Department of Public Health Science, School of  
35  
36 Health & Medical Sciences, Örebro University, Örebro, Sweden.  
37

38  
39 Email: [koustuv2010@hotmail.com](mailto:koustuv2010@hotmail.com)  
40  
41  
42  
43  
44  
45  
46  
47  
48  
49  
50  
51  
52  
53  
54  
55  
56  
57  
58  
59  
60

## Abstract

**Objective:** This study aims to examine associations between microfinance program membership, non-financial empowerment, and intimate partner violence (IPV) in different socioeconomic strata of a nationally representative sample of women in Bangladesh.

**Methods:** A cross-sectional study was based on a nationally representative interview survey of 11,178 ever-married women of reproductive age (15–49 years). 4465 women having answered the IPV-related questions were analysed separately to identify differences in proportions of exposure to IPV with regard to interactions between microfinance program membership and factors related to non-economic empowerment were considered.

**Results:** Thirty-nine percent of the women were members of microfinance programs. The overall prevalence of a history of IPV was 48% for moderate physical violence, 16% for severe physical violence, and 16% for sexual violence. For women with secondary or higher education, and women at the two wealthiest levels of the wealth index, microfinance program membership was associated with three and two times increased exposure to IPV, respectively. The least educated and poorest groups showed no change in exposure to IPV associated with microfinance programs. The educated women who were more equal with their spouses in their family relationships by participating in decision-making had an increased exposure to IPV when being members in microfinance programs.

**Conclusion:** Microfinance plans are associated with increased exposure to IPV among educated and empowered women in Bangladesh. Further prospective studies investigating the causal direction of these associations are warranted.

**Key words:** Microfinance, Violence against women, Bangladesh, Cross-sectional, DHS.

**Article focus:**

- Associations between membership in microfinance programs and exposure to intimate partner violence against woman.
- Interactions between empowerment of women through microfinance programs and non-financial empowerment through spousal equity and formal education.

**Key messages:**

- 51% of women in Bangladesh are victims of any form of intimate partner violence
- Microfinance program membership among empowered women is associated with increased risk for exposure to intimate partner violence.

**Strengths and limitations of this study:**

- The study was based on a large nationally representative sample from entire Bangladesh
- The cross-sectional study design implies that the results only can be used to hypothesize about IPV causes.

## Introduction

A growing body of research has recognized that intimate partner violence (IPV) has far-reaching health and economic impacts for women and societies worldwide [1]. IPV, in all forms, occurs every day in all parts of the world, cutting across age, religion, societal, ethnic and geographic borders. However, women who live in poverty have been reported to be particularly exposed to IPV [2–5]. The association between domestic violence and gender imbalance is also a known consequence of the subordinate status of women [6, 7]. In this context, economic empowerment has been highlighted in policy making to reduce the gender imbalance and to improve the social status of women [8]. Microfinance programs were introduced in the 1990s throughout the developing world as income-generating projects to provide credit and savings services, particularly to poor women lacking a formal education. Relationships between microfinance programs and improved status of child mortality, nutrition, immunization coverage, and contraceptive use have been documented [9–12]. In addition, descriptive epidemiological studies of associations between microfinance programs and IPV have reported promising findings of reduced IPV [13–15], and a recent cluster randomized trial from southern Africa concluded that a combined microfinance and training program reduced IPV among participants [16]. However, studies using qualitative methods [17] have identified microfinance as an exacerbating factor for IPV in Bangladesh. The interactions between microfinance programs, gender issues, education, and IPV thus warrant further epidemiological investigations in low-income countries.

Bangladesh is known globally for its microfinance programs, especially after the acknowledgment from the Nobel Committee [18]. This study set out to examine the associations between membership in microfinance programs, non-financial empowerment, and exposure to

1  
2  
3 IPV in different strata of a nationally representative sample of women in Bangladesh. In previous  
4  
5 research, microfinance programs have been regarded as a general vehicle for the empowerment  
6  
7 and emancipation of women [4]. Simultaneously, IPV in Bangladesh has been reported as a  
8  
9 socio-medical problem closely related to gender inequality and the position of women in society  
10  
11 [5, 19]. Therefore, we also wanted to study the interactions between empowerment of women  
12  
13 through microfinance and non-economic empowerment through spousal equity and formal  
14  
15 education.  
16  
17  
18  
19  
20  
21

## 22 **Methods**

23  
24 The study was based on a cross-sectional design, implemented in Bangladesh through a  
25  
26 nationally representative household survey. Reporting of the study was organized according to  
27  
28 the *Strengthening the Reporting of Observational Studies in Epidemiology* (STROBE) statement  
29  
30 [20].  
31  
32  
33  
34  
35

### 36 **Insert figure 1**

#### 37 *Data collection*

38  
39 Data collection was conducted by an interview survey in all six administrative divisions of  
40  
41 Bangladesh: Barisal, Chittagong, Dhaka, Khulna, Rajshahi, and Sylhet. Details of the survey are  
42  
43 available at [http://www.measuredhs.com/pubs/pdf/FR207/FR207\[April-10-2009\].pdf](http://www.measuredhs.com/pubs/pdf/FR207/FR207[April-10-2009].pdf). The  
44  
45 survey was designed to be representative for most of the demographic indicators for the country  
46  
47 as a whole, for each of the six divisions, and for the urban and the rural areas separately. Initially,  
48  
49 multistage cluster sampling was used, based on the 2001 population census. In total, 361  
50  
51 representative sample clusters were identified, 227 in rural areas and 134 in urban areas. From  
52  
53  
54  
55  
56  
57  
58  
59  
60

1  
2  
3 the sample clusters, 10,819 households were identified for the survey initially. Of these  
4  
5 households, 10,416 were found to be occupied, and 10,400 were available for the survey. All  
6  
7 ever-married women of reproductive age (15–49 years) who slept in the selected households the  
8  
9 night before the survey were defined as being eligible for the present study. From the survey  
10  
11 households, 11,178 eligible women were identified for interview.  
12  
13

14  
15  
16  
17 A total of 128 experienced field staff, trained for the task, in 12 interview teams conducted the  
18  
19 interviews. Each team consisted of one male supervisor, one female field editor, five female  
20  
21 interviewers, two male interviewers, and one logistics staff member. Four quality control teams  
22  
23 ensured data quality; each team included one male and one female data quality control worker. In  
24  
25 the presence of the perpetrator, interviewing the victim carries the risk of further violence.  
26  
27 Therefore, interviewers received special training on conducting an interview on spousal violence  
28  
29 based on a training manual focusing on collecting data on violence in a secure, confidential, and  
30  
31 ethical manner. Moreover, the IPV questionnaires were administered at the end of the interview,  
32  
33 enabling both the interviewer and the respondent to become well acquainted with each other by  
34  
35 the time they were discussing IPV issues [21]. The interview teams were also prepared to help  
36  
37 the women (respondents) if they asked for assistance, such as helping them to go to the women's  
38  
39 shelter, an organization assisting distressed women. The face-to-face interview took place in a  
40  
41 safe and secure place. If privacy could not be secured for the woman, the interviewers did not  
42  
43 ask IPV-related questions.  
44  
45  
46  
47  
48  
49

50  
51 The survey obtained detailed information on demographics, salient health issues, and issues  
52  
53 related to domestic violence. The current study utilized variables covering IPV and membership  
54  
55 of a microfinance program. The following variables were used.  
56  
57  
58  
59  
60



### *Intimate partner violence*

The survey data collected on IPV within the most recent 12 months (with the latest/current husband) were transformed into the following variables:

- Moderate physical violence: had the husband ever pushed, shaken, or thrown something; ever slapped; ever punched with a fist or something harmful; ever kicked or dragged.
- Severe physical violence: had the husband ever tried to choke or burn; ever threatened with a knife/gun or other weapon; ever attacked with a knife/gun or other weapon.
- Sexual violence: had the husband ever physically forced sex when not wanted.
- Any violence: having been exposed to at least one of the types of IPV defined above.

All IPV variables measured spousal violence with a shortened and modified Conflict Tactics Scale (CTS) [22].

### *Microfinance programs*

Microfinance program membership was coded for respondents who belonged to any of the following organizations: Grameen Bank, BRDB, BRAC, ASHA, PROSHIKA, or any microcredit organization. These are the best-known and popular government-approved organizations providing microfinance credit.

### *Spousal equity*

Household decision making was used as a proxy measure for gender equity in family relations. Specifically, spousal equity was measured through two variables:

1  
2  
3 Household decision making on own health issues: respondent alone; jointly by respondent and  
4  
5 her husband; respondent and other family members; respondent's husband; someone else in  
6  
7 the family.  
8  
9

10 Household decision making in household purchase issues: respondent alone; jointly by  
11  
12 respondent and her husband; respondent and other family members; respondent's husband;  
13  
14 someone else in the family.  
15  
16

17  
18  
19 The sociodemographic variables used in the present study were respondent age (15–19, 20–24,  
20  
21 25–29, 30–34, 35–39, 40–44, and 45–49 years), rural–urban residency, education (no education,  
22  
23 primary school, secondary school, and higher education), religion (Muslim and non-Muslim),  
24  
25 and whether household head was male or female. Economic status was estimated using the  
26  
27 wealth index. This index, which divides populations into five economic quartiles (poorest,  
28  
29 poorer, middle, richer, and richest), is widely used for measuring economic status in developing  
30  
31 countries [23].  
32  
33  
34

### 35 36 *Statistical analysis*

37  
38 Interactions between etiological factors were investigated by analyses of statistical associations  
39  
40 between exposure to IPV and membership in microfinance programs (that is, differences in  
41  
42 proportions of exposure to IPV based on microfinance membership or not) under different socio-  
43  
44 demographic conditions. Such interactions were investigated for each condition covered by  
45  
46 seven socio-demographic variables (age, residence, education, religion, household decision-  
47  
48 making, marital status, and wealth index) by Chi-square tests of proportions using Cramer's  $V$  as  
49  
50 a measure of effect size (.10=low, .30=moderate, .50=strong) and with Bonferroni corrections for  
51  
52 multiple comparisons. Effect sizes smaller than .10 were not considered meaningful and are  
53  
54  
55  
56  
57  
58  
59  
60

1  
2  
3 therefore not reported. Odds ratios (OR) were calculated to indicate the increase in exposure to  
4  
5 IPV associated with membership in microfinance programs compared with non-membership.  
6  
7  
8  
9

10 To examine whether the association between IPV and microfinance membership changed under  
11  
12 different conditions covered by each of the seven socio-demographic variables, the association  
13  
14 was combined with each socio-demographic variable (in seven three-way interactions, e.g. the  
15  
16 IPV\*microfinance program membership\*age-group was analysed with loglinear analyses using  
17  
18 backward elimination of highest order interaction(s). In case of a significant three-way  
19  
20 interaction, the association between IPV and microfinance membership was investigated by Chi-  
21  
22 square test of proportions over the conditions of the demographic variable.  
23  
24  
25  
26  
27  
28

29 To examine whether the association between IPV and microfinance membership differed over  
30  
31 different pairwise conditions within each of the demographic variables (21 four-way interactions,  
32  
33 e.g. the IPV\*microfinance program membership\*age-group\*residence) were tested using  
34  
35 loglinear analysis. In case of a significant four-way interaction, one of the demographic variables  
36  
37 was removed and a loglinear analysis with the remaining three-way interaction was made for  
38  
39 each condition of the removed variable.  
40  
41  
42  
43  
44  
45

46 When investigating the higher order interactions the categories used for marital status were re-  
47  
48 coded to living together (married or 'living together') or not (widowed, divorced, 'not living  
49  
50 together'). The categories used for the household decision-making variables were re-coded to  
51  
52 woman deciding (decision was made by respondent alone, jointly by respondent and her  
53  
54  
55  
56  
57  
58  
59  
60

1  
2  
3 husband, or by respondent and other family members) and others deciding (decision was made  
4  
5 by respondent's husband or by someone else in the family).  
6  
7  
8  
9

10 IBM SPSS Statistics Version 20 was used for all statistical analyses.  
11  
12  
13

### 14 *Ethical considerations*

15  
16  
17 Ethical approval for the survey was obtained from the Institutional Review Board of Opinion  
18  
19 Research Corporation (ORC), Macro International Incorporated. Informed consent was obtained  
20  
21 from the participants before the start of the survey; the right to withdraw and guarantee of  
22  
23 privacy was emphasized to the respondents throughout the survey. The field workers received  
24  
25 specific training and support to deal with issues such as domestic violence. The standards on  
26  
27 ethical and safety recommendations for research on domestic violence, which are set by the  
28  
29 World Health Organization (WHO), were strictly adhered to. The WHO recommendations aim  
30  
31 toward ensuring women's safety while maximizing disclosure of actual violence [24].  
32  
33  
34  
35  
36  
37  
38

### 39 **Results**

40  
41  
42  
43 Out of 11,178 eligible women, 10,996 (98.4%) were interviewed; 4465 (41%) of these primary  
44  
45 survey participants responded to the IPV-related questions (Fig. 1). The respondents to the IPV-  
46  
47 related questions were more frequently members of microfinance programmes (39%), compared  
48  
49 with non-respondents (35%) (Table 1). It was also found that, among those who responded to the  
50  
51 IPV questions, microfinance program membership was slightly more common among rural  
52  
53 women and women from households with a male head compared with non-responders.  
54  
55  
56  
57  
58  
59  
60

1  
2  
3 **Insert Table 1 about here**  
4  
5  
6  
7

8 Fifty-one percent ( $n=2275$  of 4465) of the women who responded to the IPV questions had been  
9 victims of some form of domestic violence (Table 2). The specific exposures reported were 48%  
10 for moderate physical violence, 16% for severe physical violence, and 11% for sexual violence.  
11 Having no formal education and belonging to the poorest group, according to the wealth index,  
12 were the socio-demographic risk factors most strongly associated with exposure to IPV. Rural  
13 residents had a slightly increased proportional rate of exposure to physical and sexual violence,  
14 and Muslim women were more exposed to IPV than their non-Muslim peers.  
15  
16  
17  
18  
19  
20  
21  
22  
23  
24  
25  
26

27 **Insert Table 2 about here**  
28

29 For women with secondary school or higher education, microfinance program membership was  
30 associated with a two- or three fold increase in exposure to IPV, respectively (Table 3).  
31  
32 Similarly, women at the two wealthiest levels of the wealth index showed a twofold increase in  
33 exposure to IPV associated with program membership. The least educated and poorest groups  
34 showed no change in IPV exposure associated with microfinance program membership. For  
35 moderate physical violence the association between IPV and microfinance was different for  
36 women living with a man or not. Microfinance membership was only significantly associated  
37 with higher levels of IPV for women living together with a man at the time of the study  
38 (Cramer's  $V=.15$ , Odds Ratio (OR)=1.8 (95% Confidence Interval (CI95): 1.6-2.1)). For  
39 moderate as well as for severe physical violence, the association between IPV and microfinance  
40 membership was significantly associated with the wealth index. Microfinance membership was  
41 significantly associated with higher levels of IPV for the richer (Cramer's  $V=.20$ , OR=2.3 (CI95:  
42  
43  
44  
45  
46  
47  
48  
49  
50  
51  
52  
53  
54  
55  
56  
57  
58  
59  
60

1  
2  
3 1.7-3.0)) and richest groups (Cramer's  $V=.15$ ,  $OR=2.0$  (CI95: 1.5-2.7)) when considering  
4  
5 moderate physical violence and for the richer group (Cramer's  $V=.17$ ,  $OR=2.5$  (CI95: 1.8-3.6))  
6  
7 when considering severe physical violence.  
8  
9

10  
11  
12  
13  
14  
15 **Insert Table 3 about here**  
16  
17  
18  
19

20 Spousal equity – represented by health-care decision making – and formal education showed a  
21  
22 significant four-way interaction with IPV – represented by *moderate physical violence* – and  
23  
24 microfinance membership indicating that the association between IPV and microfinance  
25  
26 membership is different over different combinations of spousal equity and formal education.  
27  
28 Further examination showed that for women with formal education there was an interaction  
29  
30 between spousal equity and the association between IPV and microfinance membership, while  
31  
32 there was no such an interaction for women without formal education. For women with formal  
33  
34 education who are participating in health-care decisions, there was a significant association  
35  
36 between IPV and microfinance program membership (Cramer's  $V=.22$ ,  $OR=2.5$  CI95: 2.1-3.1).  
37  
38 The same interactions were also found for decision-making about daily purchases (Cramer's  
39  
40  $V=.20$ ,  $OR=2.3$  CI95: 1.9-2.8). For severe physical violence, the patterns were similar for daily  
41  
42 purchase but with smaller effect size (Cramer's  $V=.13$ ,  $OR=2.2$  CI95: 1.7-2.9).  
43  
44  
45  
46  
47  
48  
49

50 Residence and religion showed a significant four-way interaction with IPV – represented by  
51  
52 *severe physical violence* – and microfinance membership indicating that the association between  
53  
54 IPV and microfinance membership is different over different combinations of residence and  
55  
56  
57  
58  
59  
60

1  
2  
3 religion. Further examination showed that for Muslim women, residence showed no interaction  
4  
5 with the association between IPV and microfinance membership, while there was such an  
6  
7 interaction for non-Muslim women. While there was no increase in severe physical violence  
8  
9 associated with microfinance program membership for non-Muslim women in rural areas, there  
10  
11 was such an association for non-Muslim women in urban areas (Cramer's  $V=.20$ ,  $OR=4.6$  CI95:  
12  
13 1.2-17.8).  
14  
15  
16  
17  
18  
19

20 Sexual violence did not show any statistically significant association with microfinance  
21  
22 activities.  
23  
24  
25  
26

27 More detailed analyses of associations between IPV and membership in microfinance programs  
28  
29 for different representations of spousal equity and formal education indicated higher risks for  
30  
31 women participating in decision making about management of their own health issues and who  
32  
33 had a higher formal education than primary school (Table 4). These more empowered women  
34  
35 were between two to three times more exposed to spousal violence if they also were members of  
36  
37 microfinance programs. Among these women, those with the highest formal education were at  
38  
39 more than four times higher risk of sexual violence when associated with microfinance than  
40  
41 when not. No increase in IPV risk associated with membership in microfinance programs was  
42  
43 observed for women who were not involved in decision making about management of their own  
44  
45 health issues. In addition, using decision making on household purchases as a proxy for spousal  
46  
47 equity, the women with formal education experienced increased spousal violence when they  
48  
49 were also members of microfinance programs. No such increase in IPV risk associated with  
50  
51  
52  
53  
54  
55  
56  
57  
58  
59  
60

1  
2  
3 microfinance was observed for women who were not involved in decision making on household  
4 purchases.  
5  
6  
7  
8  
9

10 **Insert Table 4 about here**  
11  
12  
13

## 14 **Discussion**

15  
16  
17  
18  
19  
20 Several previous epidemiological studies of IPV [13–15], including an early study from rural  
21 Bangladesh [9], have reported a protective effect of microfinance programs. Our results do not  
22 support the assertion that microfinance generally reduces IPV. The results from our study  
23 showed a pattern where microfinance was associated with increased exposure to IPV among  
24 women with a formal education. However, educated program members were less exposed to IPV  
25 if they were not involved in the family affairs, i.e. no increase in IPV was observed in  
26 households where the wife was associated with microfinance but excluded from the day-to-day  
27 decision making. Sexual violence was less clearly associated with different risk of IPV when  
28 being part of a microfinance program. This finding of different patterns between sexual and  
29 physical violence hypothesize existence of differences in the causes of sexual and physical IPV,  
30 which is in accordance with several previous studies from Bangladesh [5, 25–30].  
31  
32  
33  
34  
35  
36  
37  
38  
39  
40  
41  
42  
43  
44  
45  
46  
47

48 There are several limitations that have to be taken into account when interpreting the current  
49 results. The study used a cross-sectional design, implying that the results only can be used to  
50 hypothesize about IPV causes. However, the observation that formally educated microfinance  
51 program members who participated in household decision making were more exposed to IPV  
52  
53  
54  
55  
56  
57  
58  
59  
60



1  
2  
3 suggests that either disagreements between spouses related to the management of household  
4 resources were linked to IPV, or that formally educated women who participate in household  
5 decision making are more able to free themselves from an established IPV pattern by  
6 participating in microfinance programs. The current study does not include dowry demands.  
7  
8 Therefore, possible effects of dowry demands and/or microfinance plans on IPV are not explored  
9 here. Nonetheless, a recent study reports that dowry is uncommon among educated women in  
10 Bangladesh [31]. Other mechanisms linking microfinance with IPV are more likely to explain  
11 these association patterns. Even though the formally educated women were generally less  
12 exposed to IPV, microfinance loans may have caused more economic stress in this group due to  
13 larger business projects and multiple loans. It is possible that solidarity circles, which extend  
14 informal economic reciprocity beyond the family to the local community, were accepted as  
15 security for the microfinance loans among the poor. In contrast, formal security limited to the  
16 family may have been more common among the more wealthy and educated women. Such  
17 circumstances could explain why microfinance in the educated group reported more IPV  
18 exposure in interaction with non-financial empowerment, i.e. by shared household decision  
19 making [9]. Hence, there may have been fewer conflicts in households where the wife was not  
20 empowered mainly because husbands managed the loans in these households single-handedly. In  
21 addition, data on when the women joined the microfinance programs were not collected in the  
22 study. Thus, associations between the microfinance program membership phase and occurrence  
23 of IPV could not be examined. Thus, further research is needed on the mechanisms by which  
24 repayment of microfinance loans is associated with IPV among empowered women in  
25 developing countries [23].  
26  
27  
28  
29  
30  
31  
32  
33  
34  
35  
36  
37  
38  
39  
40  
41  
42  
43  
44  
45  
46  
47  
48  
49  
50  
51  
52  
53  
54  
55  
56  
57  
58  
59  
60

1  
2  
3 Even though the initial survey response rate was 98%, the rate of response to the IPV-related  
4 questions was only 39%. However, we found only minor differences in relation to  
5  
6 sociodemographic variables between responders and non-responders. Whilst the socio-  
7  
8 demographic chosen variables were similar, there may be differences not investigated, such as  
9  
10 greater severity or threat of violence, which prevented disclosure among non-responders.  
11  
12 Moreover, response bias may have resulted from recall bias or deliberate unwillingness to  
13  
14 disclose a history of domestic violence. Participants may have been reluctant to disclose their  
15  
16 own victimization of IPV, given the sensitive nature of the questions and the strong social  
17  
18 stigma. Under-reporting of events in association with the IPV-related questions may therefore  
19  
20 have reduced the primary rates. Nonetheless, we do not expect that such under-reporting  
21  
22 influenced the analyses of associations between IPV, microfinance program membership,  
23  
24 spousal equity, and the woman's educational level. The analysis included numerous statistical  
25  
26 tests but, with corrections for multiple comparisons, the family-wise error rate was maintained at  
27  
28 a reasonable level. The effect sizes were low to moderate. The results are relevant at a group  
29  
30 level, but another research design is needed to examine the factors that identify individual  
31  
32 women at different risks for IPV.  
33  
34  
35  
36  
37  
38  
39  
40  
41  
42

43 In accordance with previous research [3, 5, 9], about every second woman in our study reported  
44  
45 having been a victim of IPV. There is thus ample evidence that women in Bangladesh and other  
46  
47 countries in the Indian subcontinent suffer from a heavy burden of IPV, and the identification of  
48  
49 predisposing factors as well as countermeasures has recently been called for in this region [25].  
50  
51 We found that microfinance program membership was not associated with a decreased level of  
52  
53 IPV in any population strata. Membership was associated with higher IPV exposure among  
54  
55  
56  
57  
58  
59  
60

1  
2  
3 women with a formal education. However, our findings should be interpreted in light of the  
4  
5 limitations of the study, i.e. that a cross-sectional design was used and there was a considerable  
6  
7 non-response to the IPV-related survey questions. Other studies in different countries have  
8  
9 indicated that association with microfinance reduces IPV exposure [13–15]. The findings in this  
10  
11 study raise the question that association with microfinance are not always associated with  
12  
13 reduced levels of IPV. Therefore additional prospective studies in different settings are  
14  
15 warranted to study mechanisms by which economic stress might be a contributing factor for IPV  
16  
17 associated with microfinance, as well as on the effects resulting from interactions between  
18  
19 economic and non-economic empowerment.  
20  
21  
22  
23  
24  
25  
26

27 The results of this study still have policy implications. Microfinance programs in Bangladesh  
28  
29 make claims in their marketing campaigns about social responsibility. These organizations can  
30  
31 therefore be expected to act with particular social conscientiousness. According to the results of  
32  
33 this study, microfinance firms should be aware that program membership may increase IPV  
34  
35 exposure among women belonging to risk groups. Alternatively, microfinance firms should  
36  
37 inform applicants that microfinance program membership among formally educated women may  
38  
39 increase the risk for exposure to IPV. However, before demands to provide information about  
40  
41 risk for IPV can be put on microfinance firms, the identification of risk groups should be  
42  
43 confirmed in prospective studies.  
44  
45  
46  
47  
48  
49  
50

51 **Conflict of interest:** None declared.

52  
53 **Acknowledgement:** The authors are grateful to the field staff and management of Measure DHS  
54  
55 for procuring data and permission to use them.  
56  
57  
58  
59  
60

## References

1. WHO. *World report on violence and health*. Geneva, Switzerland: World Health Organization, 2002.
2. Diop-Sidibe N, Campbell J, Becker S. **Domestic violence against women in Egypt**. *Soc Sci Med* 2006, **62**: 1260–1277.
3. WHO. *Multi-country study on women's health and domestic violence against women*. Geneva, Switzerland: World Health Organization, 2005.
4. Kim JC, Watts CH, Hargreaves JR, et al. **Understanding the impact of a microfinance-based intervention on women's empowerment and the reduction of intimate partner violence in South Africa**. *Am J Public Health* 2007, **97**: 1794–1802.
5. Dalal K, Rahman F, Jansson B. **Wife abuse in rural Bangladesh**. *J Biosoc Sci* 2009, **41**: 561–573.
6. Khan ME, Ubaidur R, Hossain SMI. **Violence against women and its impact on women's lives – some observations from Bangladesh**. *J Fam Welfare* 2001, **46**: 12–24.
7. Bates LM, Schuler SR, Islam F, et al. **Socioeconomic factors and processes associated with domestic violence in rural Bangladesh**. *Int Fam Plan Perspect* 2004, **30**: 190–199.
8. Commission on Social Determinants of Health. *Closing the gap in a generation: health equity through action on the social determinants of health. Final report*. Geneva, Switzerland: World Health Organization, 2008.
9. Schuler SR, Hashemi SM. **Credit programmes, women's empowerment and contraceptive use in rural Bangladesh**. *Stud Fam Plan* 1994, **25**: 65–76.

- 1  
2  
3  
4  
5  
6  
7  
8  
9  
10  
11  
12  
13  
14  
15  
16  
17  
18  
19  
20  
21  
22  
23  
24  
25  
26  
27  
28  
29  
30  
31  
32  
33  
34  
35  
36  
37  
38  
39  
40  
41  
42  
43  
44  
45  
46  
47  
48  
49  
50  
51  
52  
53  
54  
55  
56  
57  
58  
59  
60
10. Hashemi SM, Schuler SR, Riley AP. **Rural credit programmes and women's empowerment in Bangladesh.** *World Dev* 1996, **24**: 635–653.
  11. Khandker SR. *Fighting poverty with microcredit: experience in Bangladesh.* New York: Oxford University Press, 1998.
  12. Schuler S, Hashemi S, Riley A. **The influence of women's changing roles and status in Bangladesh's fertility transition: evidence from a study of credit programmes and contraceptive use.** *World Dev* 1997, **25**: 563–575.
  13. Mayoux L. **Women's empowerment and microfinance programmes: strategies for increasing impact.** *Dev Pract* 1998, **8**: 235–241.
  14. UNFPA Microcredit Summit Campaign. *From microfinance to macro change: integrating health education and microfinance to empower women and reduce poverty.* New York: Microcredit Summit Campaign and the United Nations Population Fund, 2006.
  15. Ahmed SM. **Intimate partner violence against women: experiences from a woman-focused development programme in Matlab, Bangladesh.** *J Health Popul Nutr* 2006, **23**: 95–101.
  16. Pronyk PM, Hargreaves JR, Kim JC, et al. **(Effect of a structural intervention for the prevention of intimate-partner violence and HIV in rural South Africa: a cluster randomized trial.** *Lancet* 2006, **368**: 1973–1983.
  17. Schuler SR, Hashemi SM, Badal SH. **Men's violence against women in rural Bangladesh: undermined or exacerbated by microcredit programmes?** *Dev Pract* 1998, **8**: 148–157.

- 1  
2  
3  
4  
5  
6  
7  
8  
9  
10  
11  
12  
13  
14  
15  
16  
17  
18  
19  
20  
21  
22  
23  
24  
25  
26  
27  
28  
29  
30  
31  
32  
33  
34  
35  
36  
37  
38  
39  
40  
41  
42  
43  
44  
45  
46  
47  
48  
49  
50  
51  
52  
53  
54  
55  
56  
57  
58  
59  
60
18. The Nobel Peace Prize for 2006. Available:  
[http://nobelprize.org/nobel\\_prizes/peace/laureates/2006/press.html](http://nobelprize.org/nobel_prizes/peace/laureates/2006/press.html). Accessed 10 October 2012.
19. Koenig, MA, Ahmed S, Hossain MB, et al. **Women's status and domestic violence in rural Bangladesh: individual- and community-level effects.** *Demography* 2003, **40**: 269–288.
20. STROBE statement. Available: <http://www.strobe-statement.org/>. Accessed 13 January 2012.
21. Kishor S, Johnson K. *Profiling domestic violence: a multi-country study*. Calverton, MD: ORC Macro, 2004.
22. Strauss M. *Measuring intra-family conflict and violence: the conflict tactics (CT) scales*. In: Strauss MA, Gelles RJ, editors. *Physical violence in American families: risk factors and adaptations to violence in 8145 families*. New Brunswick: Transaction Publishers, 1998: 29–47.
23. Rutstein SO, Johnson K. *The DHS wealth index*. DHS comparative reports no. 6. Calverton, MD: ORC Macro, 2004.
24. WHO. *Putting women first: ethical and safety recommendations for research on domestic violence against women*. Geneva, Switzerland: World Health Organization, 2001.
25. Johnston HB, Naved RT. **Spousal violence in Bangladesh: a call for a public-health response.** *J Health Popul Nutr* 2008, **26**: 366–377.
26. Schuler S, Hashemi S, Riley P, et al. **Credit programs, patriarchy and men's violence against women in rural Bangladesh.** *Soc Sci Med* 1996, **43**: 1729–1742.

- 1  
2  
3  
4  
5  
6  
7  
8  
9  
10  
11  
12  
13  
14  
15  
16  
17  
18  
19  
20  
21  
22  
23  
24  
25  
26  
27  
28  
29  
30  
31  
32  
33  
34  
35  
36  
37  
38  
39  
40  
41  
42  
43  
44  
45  
46  
47  
48  
49  
50  
51  
52  
53  
54  
55  
56  
57  
58  
59  
60
27. Bhuiya A, Sharmin T, Hanifi SMA. **Nature of domestic violence against women in a rural area of Bangladesh: implication for preventive interventions.** 2003, **21**: 48–54.
28. Silverman JG, Decker MR, Kapur NA, et al. **Violence against wives, sexual risk and sexually transmitted infection among Bangladeshi men.** *Sex Transm Infect* 2007, **83**: 211–215.
29. Naved RT, Azim S, Bhuiya A, et al. **Physical violence by husbands: magnitude, disclosure and help-seeking behavior of women in Bangladesh.** *Soc Sci Med* 2006, **62**: 2917–2929.
30. Salam A, Alim A, Noguchi T. **Spousal abuse against women and its consequences on reproductive health: a study in the urban slums in Bangladesh.** *Matern Child Health J* 2006, **10**: 83–94.
31. Naved RT, Rimi NA, Jahan S, et al. **Paramedic-conducted mental health counselling for abused women in rural Bangladesh: an evaluation from the perspective of participants.** *J Health Popul Nutr* 2006, **27**: 477–491.

1  
2  
3 **Figure 1. Study participation displayed according to the STROBE statement.**  
4  
5  
6  
7  
8  
9  
10  
11  
12  
13  
14  
15  
16  
17  
18  
19  
20  
21  
22  
23  
24  
25  
26  
27  
28  
29  
30  
31  
32  
33  
34  
35  
36  
37  
38  
39  
40  
41  
42  
43  
44  
45  
46  
47  
48  
49  
50  
51  
52  
53  
54  
55  
56  
57  
58  
59  
60

For peer review only



**Table 1.** Membership in microfinance programs (%) among the survey participants (N = 10,996) divided by response and non-response to the IPV question and displayed by age, residence, education, religion, sex of household head, and household wealth index. The Chi-square tests are presented for differences in distribution of microfinance program membership between the respondents and the non-respondents to IPV questions.

|                       | Respondents to IPV questions |                  | Non-respondents to IPV questions |                  | Total |                  |
|-----------------------|------------------------------|------------------|----------------------------------|------------------|-------|------------------|
|                       | n                            | Microfinance (%) | n                                | Microfinance (%) | n     | Microfinance (%) |
| <b>Age (years)</b>    |                              |                  |                                  |                  |       |                  |
| 15–19                 | 462                          | 29               | 886                              | 23               | 1348  | 25               |
| 20–24                 | 851                          | 36               | 1323                             | 31               | 2174  | 33               |
| 25–29                 | 866                          | 43               | 1069                             | 37               | 1935  | 40               |
| 30–34                 | 743                          | 40               | 918                              | 39               | 1661  | 39               |
| 35–39                 | 701                          | 41               | 895                              | 41               | 1596  | 41               |
| 40–44                 | 462                          | 42               | 756                              | 38               | 1218  | 39               |
| 45–49                 | 380                          | 36               | 684                              | 35               | 1064  | 35               |
| <b>Residence</b>      |                              |                  |                                  |                  |       |                  |
| Urban                 | 1669                         | 36               | 2482                             | 33               | 4151  | 34               |
| Rural*                | 2796                         | 40+              | 4049                             | 36               | 6845  | 37               |
| <b>Education†</b>     |                              |                  |                                  |                  |       |                  |
| No education*         | 1495                         | 45+              | 2030                             | 40-              | 3525  | 42               |
| Primary               | 1348                         | 44               | 1920                             | 40               | 3268  | 42               |
| Secondary             | 1293                         | 31               | 2052                             | 29               | 3345  | 30               |
| Higher                | 327                          | 19               | 528                              | 19               | 855   | 19               |
| <b>Religion</b>       |                              |                  |                                  |                  |       |                  |
| Muslim*               | 4034                         | 38+              | 5890                             | 34               | 9924  | 35               |
| Non-Muslim            | 431                          | 48               | 641                              | 41               | 1072  | 44               |
| <b>Household head</b> |                              |                  |                                  |                  |       |                  |
| Female                | 505                          | 25               | 803                              | 27               | 1308  | 26               |
| Male*                 | 3960                         | 40+              | 5728                             | 36-              | 9688  | 38               |
| <b>Marital Status</b> |                              |                  |                                  |                  |       |                  |
| Married*              | 4194                         | 39+              | 5952                             | 35-              | 10146 | 37               |
| Widowed               | 149                          | 38               | 317                              | 29               | 466   | 32               |
| Divorced              | 37                           | 25               | 102                              | 20               | 139   | 24               |
| Not living together   | 85                           | 25               | 160                              | 28               | 245   | 27               |
| <b>Wealth index</b>   |                              |                  |                                  |                  |       |                  |
| Poorest               | 804                          | 47               | 971                              | 41               | 1775  | 44               |
| Poorer                | 857                          | 45               | 1138                             | 42               | 1995  | 43               |
| Middle                | 849                          | 43               | 1246                             | 39               | 2095  | 41               |
| Richer                | 856                          | 41               | 1345                             | 37               | 2201  | 39               |
| Richest               | 1099                         | 23               | 1831                             | 22               | 2930  | 22               |
| <b>Total*</b>         | 4465                         | 39+              | 6531                             | 35-              | 10996 | 36               |

Significance for the chi-square test is denoted by \* ( $p < .05$ , Bonferroni corrected for 26 comparisons). Standardized residuals  $>2$  are indicated by + and standardized residuals  $<-2$  are indicated by -. † Based on N = 10,993 due to missing data.

**Table 2.** Reported IPV in the final study population ( $N = 4,465$ ) given as percentages and displayed by age, residence, education, religion, sex of household head, and household wealth index. Chi-square tests are presented for differences in distributions related to each of the variables: age, residence, education, religion, household head, marital status and wealth index.

|                       | n    | Moderate physical violence<br>% | Severe physical violence<br>% | Sexual violence<br>% | Any violence<br>%   |
|-----------------------|------|---------------------------------|-------------------------------|----------------------|---------------------|
| <b>Age (years)</b>    |      |                                 |                               | $p < .001, V = .10$  |                     |
| 15–19                 | 462  | 42                              | 14                            | 15+                  | 46                  |
| 20–24                 | 851  | 47                              | 14                            | 15+                  | 50                  |
| 25–29                 | 866  | 49                              | 17                            | 12                   | 52                  |
| 30–34                 | 743  | 51                              | 18                            | 10                   | 55                  |
| 35–39                 | 701  | 48                              | 17                            | 9                    | 50                  |
| 40–44                 | 462  | 49                              | 19                            | 7–                   | 50                  |
| 45–49                 | 380  | 49                              | 17                            | 5–                   | 51                  |
| <b>Residence</b>      |      |                                 |                               |                      |                     |
| Urban                 | 1669 | 46                              | 16                            | 9                    | 47                  |
| Rural                 | 2796 | 49                              | 17                            | 12                   | 53                  |
| <b>Education†</b>     |      | $p < .001, V = .22$             | $p < .001, V = .17$           |                      | $p < .001, V = .21$ |
| No education          | 1495 | 58+                             | 23+                           | 12                   | 60+                 |
| Primary               | 1348 | 52+                             | 18                            | 12                   | 55+                 |
| Secondary             | 1293 | 39–                             | 10–                           | 9                    | 42–                 |
| Higher                | 327  | 20–                             | 6–                            | 8                    | 24–                 |
| <b>Religion</b>       |      |                                 |                               |                      |                     |
| Muslim                | 4034 | 49                              | 17                            | 11                   | 52                  |
| Non-Muslim            | 431  | 38                              | 10                            | 6                    | 40                  |
| <b>Household head</b> |      |                                 |                               |                      |                     |
| Female                | 505  | 44                              | 16                            | 11                   | 47                  |
| Male                  | 3960 | 49                              | 16                            | 11                   | 52                  |
| <b>Marital Status</b> |      |                                 | $P < .001, V = .11$           |                      |                     |
| Married               | 4194 | 48                              | 16                            | 10                   | 51                  |
| Widowed               | 149  | 44                              | 14                            | 11                   | 48                  |
| Divorced              | 37   | 62                              | 43+                           | 19                   | 62                  |
| Not living together   | 85   | 66                              | 38+                           | 24                   | 66                  |
| <b>Wealth index</b>   |      | $p < .001, V = .18$             | $p < .001, V = .14$           | $p < .001, V = .11$  | $p < .001, V = .19$ |
| Poorest               | 804  | 58+                             | 22+                           | 16+                  | 62+                 |
| Poorer                | 857  | 53+                             | 19                            | 13                   | 57+                 |
| Middle                | 849  | 53+                             | 18                            | 11                   | 56+                 |
| Richer                | 856  | 46                              | 18                            | 10                   | 49                  |
| Richest               | 1099 | 34–                             | 8–                            | 6–                   | 36–                 |
| <b>Total</b>          | 4465 | 48                              | 16                            | 11                   | 51                  |

Significant chi-square tests ( $p < .05$ , Bonferroni corrected for 7 tests per column) are reported by  $p$  values and effect size  $V$  (Cramer's  $V$ ). Standardized residuals  $>2$  are indicated by + and standardized residuals  $<-2$  are indicated by –.

† Based on  $N = 4463$  due to missing data.

1  
2  
3  
4  
5  
6  
7  
8  
9  
10  
11  
12  
13  
14  
15  
16  
17  
18  
19  
20  
21  
22  
23  
24  
25  
26  
27  
28  
29  
30  
31  
32  
33  
34  
35  
36  
37  
38  
39  
40  
41  
42  
43  
44  
45  
46  
47  
48  
49

**Table 3.** Associations between IPV and membership in microfinance (MF) programs in different sociodemographic strata (n = 4,465). Significant chi-square tests for exposure to IPV and belonging to MF programs are reported by their effect sizes (Cramer’s *V*). Odds ratios with 95% confidence intervals (OR; CI95) indicate increased risk for IPV for women belonging to MF programs compared with women who did not belong to such programs. Only significant tests (*p* < .05, Bonferroni corrected for 104 tests) are reported as significant and standardized residuals >2 are indicated by + and standardized residuals <-2 are indicated by -.

|                       | n    | Moderate physical violence |        |              |        | <i>V</i> (OR; CI95) | Severe physical violence |        |              |        | <i>V</i> (OR; CI95) |
|-----------------------|------|----------------------------|--------|--------------|--------|---------------------|--------------------------|--------|--------------|--------|---------------------|
|                       |      | No microfinance            |        | Microfinance |        |                     | No microfinance          |        | Microfinance |        |                     |
|                       |      | IPV                        | No IPV | IPV          | No IPV |                     | IPV                      | No IPV | IPV          | No IPV |                     |
| <b>Age (years)</b>    |      |                            |        |              |        |                     |                          |        |              |        |                     |
| 15–19                 | 462  | 123                        | 204    | 72           | 63     |                     | 47                       | 280    | 17           | 118    |                     |
| 20–24                 | 851  | 218-                       | 327+   | 179+         | 127-   | .18 (2.1; 1.6-2.8)  | 58-                      | 487    | 62+          | 244    | .13 (2.1; 1.4-3.2)  |
| 25–29                 | 866  | 216                        | 279    | 205          | 166    |                     | 73                       | 422    | 75           | 296    |                     |
| 30–34                 | 743  | 207                        | 238    | 175          | 123    |                     | 68                       | 377    | 64           | 234    |                     |
| 35–39                 | 701  | 173                        | 243    | 160+         | 125-   | .14 (1.8; 1.3-2.4)  | 55                       | 361    | 62           | 223    |                     |
| 40–44                 | 462  | 114                        | 156    | 114+         | 78-    | .17 (2.0; 1.4-2.9)  | 39                       | 231    | 47           | 145    |                     |
| 45–49                 | 380  | 114                        | 129    | 74           | 63     |                     | 37                       | 206    | 27           | 110    |                     |
| <b>Residence</b>      |      |                            |        |              |        |                     |                          |        |              |        |                     |
| Urban                 | 1669 | 418-                       | 645+   | 345+         | 261-   | .17 (2.0; 1.7-2.5)  | 138-                     | 925    | 121+         | 485    |                     |
| Rural                 | 2796 | 747-                       | 931+   | 634+         | 484-   | .12 (1.6; 1.4-1.9)  | 239-                     | 1439   | 233+         | 885    |                     |
| <b>Education†</b>     |      |                            |        |              |        |                     |                          |        |              |        |                     |
| No education          | 1495 | 463                        | 363    | 402          | 267    |                     | 181                      | 645    | 166          | 503    |                     |
| Primary               | 1348 | 356-                       | 400+   | 348+         | 244-   | .12 (1.6; 1.3-2.0)  | 115                      | 641    | 126          | 466    |                     |
| Secondary             | 1293 | 302-                       | 591+   | 207+         | 193-   | .17 (2.1; 1.7-2.7)  | 70                       | 823    | 55           | 345    |                     |
| Higher                | 327  | 44                         | 220    | 22           | 41     |                     | 11                       | 253    | 7            | 56     |                     |
| <b>Religion</b>       |      |                            |        |              |        |                     |                          |        |              |        |                     |
| Muslim                | 4034 | 1093-                      | 1425+  | 886+         | 630-   | .15 (1.8; 1.6-2.1)  | 357-                     | 2161   | 330+         | 1186-  | .10 (1.7; 1.3-2.2)  |
| Non-Muslim            | 431  | 72                         | 151    | 93           | 115    |                     | 20                       | 203    | 24           | 184    |                     |
| <b>Household head</b> |      |                            |        |              |        |                     |                          |        |              |        |                     |
| Female                | 505  | 154                        | 227    | 66           | 58     |                     | 53                       | 328    | 28           | 96     |                     |
| Male                  | 3960 | 1011-                      | 1349+  | 913+         | 687-   | .14 (1.8; 1.6-2.0)  | 324-                     | 2036+  | 326+         | 1274-  |                     |
| <b>Marital Status</b> |      |                            |        |              |        |                     |                          |        |              |        |                     |
| Married               | 4194 | 1071                       | 1490   | 930          | 704    | .15 (1.8; 1.6-2.1)  | 330                      | 2230   | 332          | 1302   | .10 (1.7; 1.4-2.0)  |
| Widowed               | 149  | 40                         | 54     | 26           | 30     |                     | 11                       | 82     | 10           | 46     |                     |
| Divorced              | 37   | 14                         | 10     | 9            | 4      |                     | 10                       | 14     | 6            | 7      |                     |
| Not living together   | 85   | 42                         | 22     | 14           | 7      |                     | 26                       | 38     | 6            | 15     |                     |
| <b>Wealth Index</b>   |      |                            |        |              |        |                     |                          |        |              |        |                     |
| Poorest               | 804  | 249                        | 177    | 219          | 159    |                     | 96                       | 330    | 84           | 294    |                     |
| Poorer                | 857  | 234                        | 240    | 221          | 162    |                     | 84                       | 390    | 77           | 306    |                     |
| Middle                | 849  | 237                        | 251    | 217          | 144    |                     | 77                       | 411    | 76           | 285    |                     |
| Richer                | 856  | 191-                       | 311+   | 207+         | 147-   | .20 (2.3; 1.7-3.0)  | 60-                      | 442    | 90+          | 264    | .17 (2.5; 1.8-3.6)  |
| Richest               | 1099 | 254                        | 597    | 115+         | 133-   | .15 (2.0; 1.5-2.7)  | 60                       | 791    | 27           | 221    |                     |
|                       |      | <b>Sexual violence</b>     |        |              |        |                     | <b>Any violence</b>      |        |              |        |                     |
|                       |      | No microfinance            |        | Microfinance |        | <i>V</i> (OR)       | No microfinance          |        | Microfinance |        | <i>V</i> (OR)       |
| <b>Age</b>            | N    | IPV                        | No IPV | IPV          | No IPV |                     | IPV                      | No IPV | IPV          | No IPV |                     |

|                       |      |     |      |     |      |       |       |      |      |                    |
|-----------------------|------|-----|------|-----|------|-------|-------|------|------|--------------------|
| 15-19                 | 462  | 52  | 275  | 15  | 120  | 139   | 188   | 75   | 60   |                    |
| 20-24                 | 851  | 83  | 462  | 42  | 264  | 245   | 300   | 184+ | 122- | .15 (1.8; 1.4-2.5) |
| 25-29                 | 866  | 47  | 448  | 54  | 317  | 231   | 264   | 221+ | 150- | .13 (1.7; 1.3-2.2) |
| 30-34                 | 743  | 42  | 403  | 34  | 264  | 223   | 222   | 182  | 116  |                    |
| 35-39                 | 701  | 29  | 387  | 35  | 250  | 183   | 233   | 164  | 121  | .13 (1.7; 1.3-2.3) |
| 40-44                 | 462  | 19  | 251  | 12  | 180  | 117   | 153   | 116  | 76-  | .17 (2.0; 1.4-2.9) |
| 45-49                 | 380  | 14  | 229  | 5   | 132  | 120   | 123   | 75   | 62   |                    |
| <b>Residence</b>      |      |     |      |     |      |       |       |      |      |                    |
| Urban                 | 1669 | 90  | 973  | 64  | 542  | 436-  | 627+  | 355+ | 251- | .17 (2.0; 1.6-2.5) |
| Rural                 | 2796 | 196 | 1482 | 133 | 985  | 822-  | 856+  | 662+ | 456- | .10 (1.5; 1.7-5.3) |
| <b>Education</b>      |      |     |      |     |      |       |       |      |      |                    |
| No education          | 1495 | 101 | 725  | 76  | 593  | 486   | 340   | 415  | 254  |                    |
| Primary               | 1348 | 96  | 660  | 67  | 525  | 389   | 367   | 359  | 233  |                    |
| Secondary             | 1293 | 74  | 819  | 43  | 357  | 330-  | 563+  | 216+ | 184- | .16 (2.0; 1.6-2.5) |
| Higher                | 327  | 15  | 249  | 11  | 52   | 53    | 211   | 27+  | 36   | .21 (3.0; 1.7-5.3) |
| <b>Religion</b>       |      |     |      |     |      |       |       |      |      |                    |
| Muslim                | 4034 | 276 | 2242 | 183 | 1333 | 1183- | 1335+ | 920+ | 596- | .13 (1.7; 1.5-2.0) |
| Non-Muslim            | 431  | 10  | 213  | 14  | 194  | 75    | 148   | 97   | 111  |                    |
| <b>Household head</b> |      |     |      |     |      |       |       |      |      |                    |
| Female                | 505  | 44  | 337  | 12  | 112  | 167   | 214   | 68   | 56   |                    |
| Male                  | 3960 | 242 | 2118 | 185 | 1415 | 1269+ | 1091- | 949+ | 651- | .13(1.3; 1.1-2.4)  |
| <b>Marital Status</b> |      |     |      |     |      |       |       |      |      |                    |
| Married               | 4194 | 255 | 2306 | 185 | 1449 | 1157  | 1403  | 967  | 667  | .14 (1.8; 1.6-2.0) |
| Widowed               | 149  | 12  | 82   | 5   | 51   | 45    | 48    | 27   | 29   |                    |
| Divorced              | 37   | 5   | 19   | 2   | 11   | 14    | 10    | 9    | 4    |                    |
| Not living together   | 85   | 15  | 49   | 5   | 16   | 42    | 22    | 14   | 7    |                    |
| <b>Wealth Index</b>   |      |     |      |     |      |       |       |      |      |                    |
| Poorest               | 804  | 79  | 347  | 52  | 326  | 271   | 155   | 229  | 149  |                    |
| Poorer                | 857  | 62  | 412  | 46  | 337  | 255   | 219   | 230  | 153  |                    |
| Middle                | 849  | 48  | 440  | 44  | 317  | 254   | 234   | 224  | 137  |                    |
| Richer                | 856  | 45  | 457  | 40  | 314  | 203-  | 299+  | 214+ | 140- | .20 (2.3; 1.7-3.0) |
| Richest               | 1099 | 52  | 799  | 15  | 233  | 275   | 576   | 120+ | 128- | .14 (2.0; 1.5-2.6) |

† Based on N = 4,463 due to missing data.

1  
2  
3  
4  
5  
6  
7  
8  
9  
10  
11  
12  
13  
14  
15  
16  
17  
18  
19  
20  
21  
22  
23  
24  
25  
26  
27  
28  
29  
30  
31  
32  
33  
34  
35  
36  
37  
38  
39  
40  
41  
42  
43  
44  
45  
46  
47  
48  
49

**Table 4.** Increase in IPV by membership in microfinance programs compared with non-membership displayed with regard to interaction with the woman’s educational level and spousal equity (N=4 463, there were missing data for two participants on woman’s education). Spousal equity is estimated by household decision-making policies regarding health issues and daily household purchases. The risk increase is given as the odds ratios (OR) with corresponding 95% confidence intervals.

Increase in IPV associated with microfinance program membership

| Spousal equity                  |              | Woman’s education | n    | Moderate physical violence<br>OR [95% CI] | Severe physical violence<br>OR [95% CI] | Sexual violence<br>OR [95% CI] | Any violence<br>OR [95% CI] |
|---------------------------------|--------------|-------------------|------|-------------------------------------------|-----------------------------------------|--------------------------------|-----------------------------|
| <i>Health decisions</i>         |              |                   |      |                                           |                                         |                                |                             |
| Woman                           | No schooling |                   | 957  | 1.20 [0.92 1.55]                          | 1.06 [0.79 1.43]                        | 0.88 [0.58 1.32]               | 1.16 [0.89 1.51]            |
|                                 | Primary      |                   | 865  | 1.83 [1.39 2.40]                          | 1.65 [1.17 2.33]                        | 0.93 [0.61 1.40]               | 1.70 [1.29 2.24]            |
|                                 | Secondary    |                   | 834  | 2.74 [2.03 3.69]                          | 2.06 [1.31 3.24]                        | 1.34 [0.83 2.14]               | 2.69 [2.00 3.63]            |
|                                 | Higher       |                   | 255  | 3.20 [1.62 6.34]                          | 2.00 [0.65 6.12]                        | 4.55 [1.85 11.19]              | 3.95 [2.06 7.58]            |
| Other                           | No schooling |                   | 538  | 1.14 [0.81 1.61]                          | 1.42 [0.94 2.14]                        | 1.00 [0.60 1.65]               | 1.10 [0.78 1.56]            |
|                                 | Primary      |                   | 483  | 1.26 [0.88 1.81]                          | 1.25 [0.77 2.03]                        | 0.79 [0.45 1.39]               | 1.10 [0.76 1.57]            |
|                                 | Secondary    |                   | 459  | 1.25 [0.83 1.89]                          | 1.51 [0.77 2.97]                        | 1.29 [0.62 2.68]               | 1.14 [0.76 1.71]            |
|                                 | Higher       |                   | 72   | 1.47 [0.34 6.44]                          | 15.25 [1.24 187.85]                     | 0 [-]                          | 1.05 [0.24 4.51]            |
| <i>Daily purchase decisions</i> |              |                   |      |                                           |                                         |                                |                             |
| Women                           | No schooling |                   | 1034 | 1.11 [0.86 1.42]                          | 1.04 [0.78 1.39]                        | 0.94 [0.62 1.41]               | 1.09 [0.85 1.40]            |
|                                 | Primary      |                   | 882  | 1.92 [1.46 2.51]                          | 1.79 [1.26 2.53]                        | 0.89 [0.57 1.37]               | 1.70 [1.30 2.22]            |
|                                 | Secondary    |                   | 840  | 2.16 [1.61 2.89]                          | 2.06 [1.32 3.23]                        | 1.34 [0.83 2.14]               | 2.08 [1.56 2.78]            |
|                                 | Higher       |                   | 249  | 2.90 [1.44 5.86]                          | 2.80 [0.76 10.32]                       | 4.55 [1.61 12.81]              | 3.02 [1.54 5.91]            |
| Other                           | No schooling |                   | 461  | 1.35 [0.93 1.97]                          | 1.55 [1.00 2.40]                        | 0.95 [0.57 1.57]               | 1.27 [0.87 1.86]            |
|                                 | Primary      |                   | 466  | 1.13 [0.78 1.64]                          | 1.07 [0.66 1.75]                        | 0.91 [0.54 1.53]               | 1.07 [0.74 1.56]            |
|                                 | Secondary    |                   | 453  | 1.97 [1.28 3.03]                          | 1.48 [0.68 2.87]                        | 1.27 [0.61 2.66]               | 1.84 [1.20 2.81]            |
|                                 | Higher       |                   | 78   | 2.28 [0.64 8.06]                          | 3.60 [0.74 17.48]                       | 2.49 [0.55 11.25]              | 3.29 [0.97 11.19]           |

# Interactions between microfinance programs and non-economic empowerment of women associated with intimate partner violence in Bangladesh

Formatted: Font: 18 pt, Font color: Text 1, (Asian) Chinese (PRC), (Other) English (U.K.), Kern at 14 pt

Formatted: Font color: Text 1, English (U.K.)

Formatted: Font color: Text 1

Koustuv Dalal<sup>1\*</sup>, Örjan Dahlstöm<sup>2,3</sup>, Toomas Timpka<sup>2</sup>

Formatted: Font: 14 pt, Font color: Text 1

Formatted: Font: 14 pt, Font color: Text 1

Formatted: Font color: Text 1

<sup>1</sup> School of Health and Medical Sciences, Örebro University, Örebro, Sweden

Formatted: Font color: Text 1, English (U.K.)

<sup>2</sup> Department of Medical and Health Sciences, Linköping University, Linköping, Sweden

Formatted: Font color: Text 1

Formatted: Font color: Text 1, English (U.K.)

<sup>3</sup> Linnaeus Centre HEAD, Swedish Institute for Disability Research, Department of Behavioural Sciences and Learning, Linköping University, Sweden

Formatted: Font color: Text 1

Formatted: Font color: Text 1, English (U.K.)

**Running title:** Microfinance and violence against women (2807 words)

Formatted: Font color: Text 1, English (U.K.)

\* Corresponding author: Koustuv Dalal, PhD, Department of Public Health Science, School of Health & Medical Sciences, Örebro University, Örebro, Sweden.

Formatted: Font color: Text 1

Email: [koustuv2010@hotmail.com](mailto:koustuv2010@hotmail.com)

Formatted: Font color: Text 1, English (U.K.)

Formatted: Font color: Text 1, English (U.K.)

Formatted: Font color: Text 1

Formatted: Font color: Text 1, English (U.K.)

1  
2  
3  
4  
5  
6  
7  
8  
9  
10  
11  
12  
13  
14  
15  
16  
17  
18  
19  
20  
21  
22  
23  
24  
25  
26  
27  
28  
29  
30  
31  
32  
33  
34  
35  
36  
37  
38  
39  
40  
41  
42  
43  
44  
45  
46  
47  
48  
49  
50  
51  
52  
53  
54  
55  
56  
57  
58  
59  
60**Abstract**

**Objective:** This study aims to examine ~~the~~ associations between microfinance program membership, ~~non-financial empowerment~~, and intimate partner violence (IPV) in different socioeconomic strata of a nationally representative sample of women in Bangladesh.

**Methods:** ~~The~~ cross-sectional study was based on a nationally representative interview survey of 11,178 ever-married women of reproductive age (15–49 years). 4465 women ~~having~~ answered the IPV-related questions were ~~analyzed~~~~analysed~~ separately ~~using chi-square tests and Cramer's  $\chi^2$  as a measure of effect size~~ to identify differences in proportions of exposure to IPV with regard to ~~microfinance program membership and demographic variables and~~ interactions between microfinance program membership and factors related to non-economic empowerment were considered.

**Results:** ~~Only 39%~~~~Thirty-nine percent~~ of ~~the~~ women were members of microfinance programs. The ~~overall~~ prevalence of a history of IPV was 48% for moderate ~~and physical violence~~, 16% for severe physical violence, ~~and~~ 16% for sexual violence. For women with secondary or higher education, and women at the two wealthiest levels of the wealth index, microfinance program membership ~~was associated with three and two times~~ increased ~~the~~ exposure to IPV ~~two three and two times~~, respectively. The least educated and poorest groups showed no change in exposure to IPV associated with microfinance programs. The educated women who were more equal with their spouses in their family relationships by participating in decision-making ~~had an~~ increased ~~their~~ exposure to IPV ~~by membership when being members~~ in microfinance programs.

**Conclusion:** Microfinance plans are associated with increased exposure to IPV among educated and empowered women in Bangladesh. ~~Microfinance firms should consider providing information about associations between microfinance and IPV to the women belonging to risk~~

Formatted: Font color: Text 1, English (U.K.)

Formatted: Font color: Text 1

1  
2  
3  
4  
5  
6  
7  
8  
9 groups Further prospective studies investigating the causal direction of these associations are  
10 warranted.

Formatted: Font color: Text 1, English (U.K.)

11  
12  
13 **Key words:** Microfinance, Violence against women, Bangladesh, Cross-sectional, DHS.

Formatted: Font color: Text 1

14  
15  
16  
17  
18  
19  
20  
21  
22  
23  
24  
25  
26  
27  
28  
29  
30  
31  
32  
33  
34  
35  
36  
37  
38  
39  
40  
41  
42  
43  
44  
45  
46  
47  
48  
49  
50  
51  
52  
53  
54  
55  
56  
57  
58  
59  
60

For peer review only



1  
2  
3  
4  
5  
6  
7  
8  
9  
10  
11  
12  
13  
14  
15  
16  
17  
18  
19  
20  
21  
22  
23  
24  
25  
26  
27  
28  
29  
30  
31  
32  
33  
34  
35  
36  
37  
38  
39  
40  
41  
42  
43  
44  
45  
46  
47  
48  
49  
50  
51  
52  
53  
54  
55  
56  
57  
58  
59  
60

### Article focus:

- Associations between membership in microfinance programs and exposure to intimate partner violence against woman.
- Interactions between empowerment of women through microfinance programs and non-economiefinancial empowerment through spousal equity and formal education.

Formatted: Font color: Text 1, English (U.K.)

Formatted: Font color: Text 1, English (U.K.)

Formatted: Font color: Text 1, English (U.K.)

### Key messages:

- 51% of ~~the~~ women respondents in Bangladesh are victims of any form of intimate partner violence
- ~~For different socioeconomic backgrounds, micro finance association of the~~ Microfinance program membership among empowered women enhances their ~~is associated with~~ increased risk for exposure to intimate partner violence.
- ~~Equity in family decision making for the educated women increased the exposure to IPV by membership in microfinance programs.~~

Formatted: Font color: Text 1, English (U.K.)

### Strengths and limitations of this study:

- ~~National~~ The study was based on a large nationally representative sample from entire Bangladesh
- ~~Cross~~ The cross-sectional study design implies that the results only can be used to hypothesize about IPV causes.

Formatted: Font color: Text 1, English (U.K.)

Formatted: Font color: Text 1, English (U.K.)

Formatted: Font color: Text 1, English (U.K.)

Formatted: Font color: Text 1

## Introduction

A growing body of research has recognized that intimate partner violence (IPV) has far-reaching health and economic impacts for women and societies worldwide [1]. IPV, in all forms, occurs every day in all parts of the world, cutting across age, religion, societal, ethnic and geographic borders. However, women who live in poverty have been reported to be particularly exposed to IPV [2–5]. The association between domestic violence and gender imbalance is also a known consequence of the subordinate status of women [6, 7]. In this context, economic empowerment has been highlighted in policy making to reduce the gender imbalance and to improve the social status of women [8]. Microfinance programs were introduced in the 1990s throughout the developing world as income-generating projects to provide credit and savings services, particularly to poor women lacking a formal education. Relationships between microfinance programs and improved status of child mortality, nutrition, immunization coverage, and contraceptive use have been documented [9–12]. In addition, descriptive epidemiological studies of associations between microfinance programs and IPV have reported promising findings of reduced IPV [13–15], and a recent cluster randomized trial from southern Africa concluded that a combined microfinance and training program reduced IPV among participants [16]. However, studies using qualitative methods [17] have identified microfinance as an exacerbating factor for IPV in Bangladesh. The interactions between microfinance programs, gender issues, education, and IPV thus warrant further epidemiological investigations in low-income countries.

Formatted: Font color: Text 1, English (U.K.)

Formatted: Font color: Text 1

Formatted: Font color: Text 1, English (U.K.)

1  
2  
3  
4  
5  
6  
7  
8  
9  
10  
11 Bangladesh is known globally for its microfinance programs, especially after the  
12 acknowledgment from the Nobel Committee [18]. This study set out to examine the associations  
13 between membership in microfinance programs, non-financial empowerment, and exposure to  
14 IPV in different strata of a nationally representative sample of women in Bangladesh. In previous  
15 research, microfinance programs have been regarded as a general vehicle for the empowerment  
16 and emancipation of women [4]. Simultaneously, IPV in Bangladesh has been reported as a  
17 socio-medical problem closely related to gender inequality and the position of women in society  
18 [5, 19]. Therefore, we also wanted to study the interactions between empowerment of women  
19 through microfinance and non-economic empowerment through spousal equity and formal  
20 education.  
21  
22  
23  
24  
25  
26  
27  
28  
29  
30  
31

## 32 **Methods**

33 The study was based on a cross-sectional design, implemented in Bangladesh through a  
34 nationally representative household survey. Reporting of the study was organized according to  
35 the *Strengthening the Reporting of Observational Studies in Epidemiology* (STROBE) statement  
36 [20].  
37  
38  
39  
40  
41  
42  
43

### 44 **Insert figure 1**

#### 45 *Data collection*

46 Data collection was conducted by an interview survey in all six administrative divisions of  
47 Bangladesh: Barisal, Chittagong, Dhaka, Khulna, Rajshahi, and Sylhet. Details of the survey are  
48 available at [http://www.measuredhs.com/pubs/pdf/FR207/FR207\[April-10-2009\].pdf](http://www.measuredhs.com/pubs/pdf/FR207/FR207[April-10-2009].pdf). The  
49  
50  
51  
52  
53  
54  
55  
56  
57  
58  
59  
60

Formatted: Font color: Text 1, English (U.K.)

Formatted: Font color: Text 1

Formatted: Font color: Text 1, English (U.K.)

Formatted: Font: Not Italic, Font color: Text 1, English (U.K.)

Formatted: Font color: Text 1, English (U.K.)

1  
2  
3  
4  
5  
6  
7  
8  
9 survey was designed to be representative for most of the demographic indicators for the country  
10 as a whole, for each of the six divisions, and for the urban and the rural areas separately. Initially,  
11 multistage cluster sampling was used, based on the 2001 population census. In total, 361  
12 representative sample clusters were identified, 227 in rural areas and 134 in urban areas. From  
13 the sample clusters, 10,819 households were identified for the survey initially. Of these  
14 households, 10,416 were found to be occupied, and 10,400 were available for the survey. All  
15 ever-married women of reproductive age (15–49 years) who slept in the selected households the  
16 night before the survey were defined as being eligible for the present study. From the survey  
17 households, 11,178 eligible women were identified for interview.

18  
19  
20  
21  
22  
23  
24  
25  
26  
27  
28 A total of 128 experienced field staff, trained for the task, in 12 interview teams conducted the  
29 interviews. Each team consisted of one male supervisor, one female field editor, five female  
30 interviewers, two male interviewers, and one logistics staff member. Four quality control teams  
31 ensured data quality; each team included one male and one female data quality control worker. In  
32 the presence of the perpetrator, interviewing the victim carries the risk of further violence.

33  
34  
35  
36  
37 Therefore, interviewers received special training on conducting an interview on spousal violence  
38 based on a training manual focusing on collecting data on violence in a secure, confidential, and  
39 ethical manner. Moreover, the IPV questionnaires were administered at the end of the interview,  
40 enabling both the interviewer and the respondent to become well acquainted with each other by  
41 the time they were discussing IPV issues [21]. The interview teams were also prepared to help  
42 the women (respondents) if they asked for assistance, such as helping them to go to the women's  
43 shelter, an organization assisting distressed women. The face-to-face interview took place in a  
44 safe and secure place. If privacy could not be secured for the woman, the interviewers did not  
45  
46  
47  
48  
49  
50  
51  
52

1  
2  
3  
4  
5  
6  
7  
8  
9  
10  
11  
12  
13  
14  
15  
16  
17  
18  
19  
20  
21  
22  
23  
24  
25  
26  
27  
28  
29  
30  
31  
32  
33  
34  
35  
36  
37  
38  
39  
40  
41  
42  
43  
44  
45  
46  
47  
48  
49  
50  
51  
52  
53  
54  
55  
56  
57  
58  
59  
60

ask IPV-related questions.

The survey obtained detailed information on demographics, salient health issues, and issues related to domestic violence. The current study utilized variables covering IPV and membership of a microfinance program. The following variables were used.

Formatted: Font color: Text 1

#### *Intimate partner violence*

The survey data collected on IPV within the most recent 12 months (with the latest/current husband) were transformed into the following variables:

- Moderate physical violence: had the husband ever pushed, shaken, or thrown something; ever slapped; ever punched with a fist or something harmful; ever kicked or dragged.
- Severe physical violence: had the husband ever tried to choke or burn; ever threatened with a knife/gun or other weapon; ever attacked with a knife/gun or other weapon.
- Sexual violence: had the husband ever physically forced sex when not wanted.
- Any violence: having been exposed to at least one of the types of IPV defined above.

All IPV variables measured spousal violence with a shortened and modified Conflict Tactics

Formatted: Font color: Text 1, English (U.K.)

Scale (CTS) [22].

Formatted: Font color: Text 1

#### *Microfinance programs*

Formatted: Font color: Text 1

Microfinance program membership was coded for respondents who belonged to any of the following organizations: Grameen Bank, BRDB, BRAC, ASHA, PROSHIKA, or any microcredit organization. These are the best-known and popular government-approved organizations providing microfinance credit.

### *Spousal equity*

Household decision making was used as a proxy measure for gender equity in family relations.

Specifically, spousal equity was measured through two variables:

Household decision making on own health issues: respondent alone; jointly by respondent and her husband; respondent and other family members; respondent's husband; someone else in the family.

Household decision making in household purchase issues: respondent alone; jointly by respondent and her husband; respondent and other family members; respondent's husband; someone else in the family.

The sociodemographic variables used in the present study were respondent age (15–19, 20–24, 25–29, 30–34, 35–39, 40–44, and 45–49 years), rural–urban residency, education (no education, primary school, secondary school, and higher education), religion (Muslim and non-Muslim), and whether household head was male or female. Economic status was estimated using the wealth index. This index, which divides populations into five economic quartiles (poorest, poorer, middle, richer, and richest), is widely used for measuring economic status in developing countries [23].

### *Statistical analysis*

~~Chi-square tests were used to examine~~ Interactions between etiological factors were investigated by analyses of statistical associations between exposure to IPV and membership in microfinance programs (that is, differences in proportions of exposure to IPV (moderate physical, severe physical, sexual, and any violence) and association between microfinance and based on microfinance membership or not) under different socio-demographic conditions. Such

Formatted: Font color: Text 1, English (U.K.)

Formatted: Font color: Text 1

Formatted: Font color: Text 1, English (U.K.)

1  
2  
3  
4  
5  
6  
7  
8  
9  
10  
11  
12  
13  
14  
15  
16  
17  
18  
19  
20  
21  
22  
23  
24  
25  
26  
27  
28  
29  
30  
31  
32  
33  
34  
35  
36  
37  
38  
39  
40  
41  
42  
43  
44  
45  
46  
47  
48  
49  
50  
51  
52  
53  
54  
55  
56  
57  
58  
59  
60

interactions were investigated for each condition covered by seven socio-demographic variables (age, residence, education, religion, household decision-making, marital status, and wealth index) with by Chi-square tests of proportions using Cramer's  $V$  as a measure of effect size (.10=low, .30=moderate, .50=strong) and with Bonferroni corrections for multiple comparisons.

Formatted: Font color: Text 1, English (U.K.)

Effect sizes smaller than .10 were not considered meaningful and are therefore not reported.

Formatted: Font color: Text 1, English (U.K.)

Odds ratios (OR) were calculated to indicate the increase in exposure to IPV associated with membership in microfinance programs compared with non-membership. ~~For analysis of interaction effects between spousal equity and microfinance programs in relation to the sociodemographic variables found associated with IPV, the~~

To examine whether the association between IPV and microfinance membership changed under different conditions covered by each of the seven socio-demographic variables, the association was combined with each socio-demographic variable (in seven three-way interactions, e.g. the IPV\*microfinance program membership\*age-group was analysed with loglinear analyses using backward elimination of highest order interaction(s). In case of a significant three-way interaction, the association between IPV and microfinance membership was investigated by Chi-square test of proportions over the conditions of the demographic variable.

To examine whether the association between IPV and microfinance membership differed over different pairwise conditions within each of the demographic variables (21 four-way interactions, e.g. the IPV\*microfinance program membership\*age-group\*residence) were tested using loglinear analysis. In case of a significant four-way interaction, one of the demographic variables

1  
2  
3  
4  
5  
6  
7  
8  
9 was removed and a loglinear analysis with the remaining three-way interaction was made for  
10 each condition of the removed variable.

11  
12  
13  
14 When investigating the higher order interactions the categories used for marital status were re-  
15 coded to living together (married or 'living together') or not (widowed, divorced, 'not living  
16 together'). The categories used for the household decision-making variables were re-coded to  
17  
18 woman deciding (decision was made by respondent alone, jointly by respondent and her  
19  
20 husband, or by respondent and other family members) and others deciding (decision was made  
21  
22 by respondent's husband or by someone else in the family).  
23  
24

25  
26  
27  
28 IBM SPSS Statistics Version 20 was used for all statistical analyses.

### 29 30 31 *Ethical considerations*

32  
33 Ethical approval for the survey was obtained from the Institutional Review Board of Opinion  
34  
35 Research Corporation (ORC), Macro International Incorporated. Informed consent was obtained  
36  
37 from the participants before the start of the survey; the right to withdraw and guarantee of  
38  
39 privacy was emphasized to the respondents throughout the survey. The field workers received  
40  
41 specific training and support to deal with issues such as domestic violence. The standards on  
42  
43 ethical and safety recommendations for research on domestic violence, which are set by the  
44  
45 World Health Organization (WHO), were strictly adhered to. The WHO recommendations aim  
46  
47 toward ensuring women's safety while maximizing disclosure of actual violence [24].  
48

### 49 50 **Results**

51  
52  
53  
54  
55  
56  
57  
58  
59  
60

Formatted: Font color: Text 1, English (U.K.)

Formatted: Font color: Text 1, English (U.K.)

Formatted: Font color: Text 1

Formatted: Font color: Text 1, English (U.K.)

Formatted: Font color: Text 1

Formatted: Font color: Text 1, English (U.K.)

Formatted: Font color: Text 1



1  
2  
3  
4  
5  
6  
7  
8  
9  
10  
11  
12  
13  
14  
15  
16  
17  
18  
19  
20  
21  
22  
23  
24  
25  
26  
27  
28  
29  
30  
31  
32  
33  
34  
35  
36  
37  
38  
39  
40  
41  
42  
43  
44  
45  
46  
47  
48  
49  
50  
51  
52  
53  
54  
55  
56  
57  
58  
59  
60

Among Out of 11,178 eligible women, 10,996 (98.4%) were interviewed; 4465 (41%) of these primary survey participants responded to the IPV-related questions (Fig. 1). Respondents The respondents to these the IPV-related questions were more frequently members of microfinance programmes (39%), compared with non-respondents (35%) (Table 1). It was also found that, among those who responded to the IPV questions, microfinance program membership was slightly more common among rural women and women from households with a male head compared with non-responders.

Insert Table 1 about here

Fifty-one percent (n=2275 of 4465) of the women who responded to the IPV questions had been victims of some form of domestic violence (Table 2). The specific exposures reported were 48% for moderate physical violence, 16% for severe physical violence, and 11% for sexual violence. Forty nine percent of the women had not been exposed to any IPV. Having no formal education and belonging to the poorest group, according to the wealth index, were the socio-demographic socio-demographic risk factors most strongly associated with exposure to IPV. Rural residents had a slightly increased proportional rate of exposure to physical and sexual violence, and Muslim women were more exposed to IPV than their non-Muslim peers.

Insert Table 2 about here

For women with secondary school or higher education, microfinance program membership was associated with a two- or three fold increase in exposure to IPV, respectively (Table 3).

Formatted: Font color: Text 1, English (U.K.)

Formatted: Font color: Text 1, English (U.K.)

Formatted: Font color: Text 1, English (U.K.)

Formatted: Font color: Text 1

Formatted: Font color: Text 1

Formatted: Font color: Text 1, English (U.K.)

Formatted: Font color: Text 1

Formatted: Font color: Text 1, English (U.K.)

Formatted: Font color: Text 1

Formatted: Font color: Text 1, English (U.K.)

Formatted: Font color: Text 1, English (U.K.)

Formatted: Font color: Text 1, English (U.K.)

Formatted: Font color: Text 1

Formatted: Font color: Text 1

1  
2  
3  
4  
5  
6  
7  
8  
9 Similarly, women at the two wealthiest levels of the wealth index showed a twofold increase in  
10 exposure to IPV associated with program membership. The least educated and poorest groups  
11 showed no change in IPV exposure associated with microfinance programs. ~~Sexual violence did~~  
12 ~~not show any statistically significant increase with microfinance activities~~ program membership.  
13 For moderate physical violence the association between IPV and microfinance was different for  
14 women living with a man or not. Microfinance membership was only significantly associated  
15 with higher levels of IPV for women living together with a man at the time of the study  
16 (Cramer's V=.15, Odds Ratio (OR)=1.8 (95% Confidence Interval (CI95): 1.6-2.1)). For  
17 moderate as well as for severe physical violence, the association between IPV and microfinance  
18 membership was significantly associated with the wealth index. Microfinance membership was  
19 significantly associated with higher levels of IPV for the richer (Cramer's V=.20, OR=2.3 (CI95:  
20 1.7-3.0)) and richest groups (Cramer's V=.15, OR=2.0 (CI95: 1.5-2.7)) when considering  
21 moderate physical violence and for the richer group (Cramer's V=.17, OR=2.5 (CI95: 1.8-3.6))  
22 when considering severe physical violence.

Formatted: Font color: Text 1

Formatted: Font color: Text 1

37  
38  
39 **Insert Table 3 about here**

40  
41  
42  
43 ~~The detailed analyses of interaction effects showed that only formally educated women, who~~  
44 ~~were more equal with their spouses in their family relationships, experienced more IPV by~~  
45 ~~membership in microfinance programs (Table 4). Women~~ Spousal equity – represented by health-  
46 care decision making – and formal education showed a significant four-way interaction with IPV  
47 – represented by moderate physical violence – and microfinance membership indicating that the  
48  
49  
50  
51  
52

1  
2  
3  
4  
5  
6  
7  
8  
9 association between IPV and microfinance membership is different over different combinations  
10 of spousal equity and formal education. Further examination showed that for women with formal  
11 education there was an interaction between spousal equity and the association between IPV and  
12 microfinance membership, while there was no such an interaction for women without formal  
13 education. For women with formal education who are participating in health-care decisions, there  
14 was a significant association between IPV and microfinance program membership (Cramer's  
15 V=.22, OR=2.5 CI95: 2.1-3.1). The same interactions were also found for decision-making about  
16 daily purchases (Cramer's V=.20, OR=2.3 CI95: 1.9-2.8). For severe physical violence, the  
17 patterns were similar for daily purchase but with smaller effect size (Cramer's V=.13, OR=2.2  
18 CI95: 1.7-2.9).

19  
20  
21  
22  
23  
24  
25  
26  
27  
28  
29 Residence and religion showed a significant four-way interaction with IPV – represented by  
30 severe physical violence – and microfinance membership indicating that the association between  
31 IPV and microfinance membership is different over different combinations of residence and  
32 religion. Further examination showed that for Muslim women, residence showed no interaction  
33 with the association between IPV and microfinance membership, while there was such an  
34 interaction for non-Muslim women. While there was no increase in severe physical violence  
35 associated with microfinance program membership for non-Muslim women in rural areas, there  
36 was such an association for non-Muslim women in urban areas (Cramer's V=.20, OR=4.6 CI95:  
37 1.2-17.8).

38  
39  
40  
41  
42  
43  
44  
45  
46  
47  
48 Sexual violence did not show any statistically significant association with microfinance  
49 activities.  
50  
51  
52  
53  
54  
55  
56  
57  
58  
59  
60

1  
2  
3  
4  
5  
6  
7  
8  
9  
10  
11 More detailed analyses of associations between IPV and membership in microfinance programs  
12 for different representations of spousal equity and formal education indicated higher risks for  
13 women participating in decision making about management of their own health issues and who  
14 had a higher formal education than primary school (Table 4). These more empowered women  
15 were between two to three times more exposed to spousal violence when if they also were  
16 members of microfinance programs. Among these women, those with the highest formal  
17 education were at more than four times higher risk of sexual violence when associated with  
18 microfinance than when not. No increase in IPV risk associated with membership in  
19 microfinance programs was observed for women who were not involved in decision making  
20 about management of their own health issues. In addition, using decision making on household  
21 purchases as a proxy for spousal equity, the women with formal education experienced increased  
22 spousal violence when they were also members of microfinance programs. No such increase in  
23 IPV risk associated with microfinance was observed for women who were not involved in  
24 decision making on household purchases.

25  
26  
27  
28  
29  
30  
31  
32  
33  
34  
35  
36  
37  
38  
39 **Insert Table 4 about here**  
40  
41

## 42 Discussion

43  
44  
45  
46 Several previous epidemiological studies of IPV [13–15], including an early study from rural  
47 Bangladesh [9], have reported a protective effect of microfinance programs. Our results do not  
48 support the assertion that microfinance generally reduces IPV. The results from our study

Formatted: Font color: Text 1

Formatted: Font color: Text 1, English (U.K.)

Formatted: Font color: Text 1

1  
2  
3  
4  
5  
6  
7  
8  
9 showed a pattern where microfinance was associated with increased exposure to IPV among  
10 women with a formal education. However, educated program members were less exposed to IPV  
11 if they were not involved in the family affairs, i.e. no increase in IPV was observed in  
12 households where the wife was associated with microfinance but excluded from the day-to-day  
13 decision making. Sexual violence was less clearly associated with different risk of IPV when  
14 being part of a microfinance program. This finding of different patterns between sexual and  
15 physical violence hypothesize ~~existing~~existence of differences in the causes of sexual and  
16 physical IPV, which is in accordance with several previous studies from Bangladesh [5, 25–30],

Formatted: Font color: Text 1

Formatted: Font color: Text 1, English (U.K.)

25  
26 There are several limitations that have to be taken into account when interpreting the current  
27 results. The study used a cross-sectional design, implying that the results only can be used to  
28 hypothesize about IPV causes. However, the observation that formally educated microfinance  
29 program members who participated in household decision making were more exposed to IPV  
30 suggests that either disagreements between spouses related to the management of household  
31 resources were linked to IPV, or that formally educated women who participate in household  
32 decision making are more able to free themselves from an established IPV pattern by  
33 participating in microfinance programs. The current study does not include dowry demands.  
34 Therefore, possible effects of dowry demands and/or microfinance plans on IPV are not explored  
35 here. Nonetheless, a recent study reports that dowry is uncommon among educated women in  
36 Bangladesh [31]. Other mechanisms linking microfinance with IPV are more likely to explain  
37 these association patterns. Even though the formally educated women were generally less  
38 exposed to IPV, ~~microfinanced~~microfinance loans may have caused more economic stress in this  
39 group due to larger business projects and multiple loans. It is possible that solidarity circles,

Formatted: Font color: Text 1, English (U.K.)

1  
2  
3  
4  
5  
6  
7  
8  
9 which extend informal economic reciprocity beyond the family to the local community, were  
10 accepted as security for the microfinance loans among the poor. In contrast, formal security  
11 limited to the family may have been more common among the more wealthy and educated  
12 women. Such circumstances could explain why microfinance in the educated group reported  
13 more IPV exposure in interaction with non-financial empowerment, i.e. by shared household  
14 decision making [9]. Hence, there may have been fewer conflicts in households where the wife  
15 was not empowered mainly because husbands managed the loans in these households single-  
16 handedly. In addition, data on when the women joined the microfinance programs were not  
17 collected in the study. Thus, associations between the microfinance program membership phase  
18 and occurrence of IPV could not be examined. Thus, further research is needed on the  
19 mechanisms by which repayment of microfinance loans is associated with IPV among  
20 empowered women in developing countries [23].  
21  
22  
23  
24  
25  
26  
27  
28  
29  
30  
31  
32

33 Even though the initial survey response rate was 98%, the rate of response to the IPV-related  
34 questions was only 39%. However, we found only minor differences in relation to  
35 sociodemographic variables between responders and non-responders. Whilst the socio-  
36 demographic chosen variables were similar, there may be differences not investigated, such as  
37 greater severity or threat of violence, which prevented disclosure among non-responders.  
38  
39  
40  
41  
42

43 Moreover, response bias may have resulted from recall bias or deliberate unwillingness to  
44 disclose a history of domestic violence. Participants may have been reluctant to disclose their  
45 own victimization of IPV, given the sensitive nature of the questions and the strong social  
46 stigma. Under-reporting of events in association with the IPV-related questions may therefore  
47 have reduced the primary rates. Nonetheless, we do not expect that such under-reporting  
48  
49  
50  
51  
52

Formatted: Font color: Text 1, English (U.K.)

1  
2  
3  
4  
5  
6  
7  
8  
9 influenced the analyses of associations between IPV, microfinance program membership,  
10 spousal equity, and the woman's educational level. The analysis included numerous statistical  
11 tests but, with corrections for multiple comparisons, the family-wise error rate was maintained at  
12 a reasonable level. The effect sizes were low to moderate. The results are relevant at a group  
13 level, but another research design is needed to examine the factors that identify individual  
14 women at different risks for IPV.  
15  
16  
17  
18  
19

20  
21  
22 In accordance with previous research [3, 5, 9], about every second woman in our study reported  
23 having been a victim of IPV. There is thus ample evidence that women in Bangladesh and other  
24 countries in the Indian subcontinent suffer from a heavy burden of IPV, and the identification of  
25 predisposing factors as well as countermeasures has recently been called for in this region [25].  
26  
27

28 We found that microfinance program membership was not associated with a decreased level of  
29 IPV in any population strata. Membership was associated with higher IPV exposure among  
30 women with a formal education. However, our findings should be interpreted in light of the  
31 limitations of the study (i.e. that a cross-sectional design was used and there was a considerable  
32 non-response to the IPV-related survey questions). Other studies in different countries have  
33 indicated that association with microfinance reduces IPV exposure [13–15]. The findings in this  
34 study raise the question that association with microfinance are not always associated with  
35 reduced levels of IPV. Therefore additional prospective studies in different settings are  
36 warranted to study mechanisms by which economic stress might be a contributing factor for  
37 IPV associated with microfinance, as well as on the effects resulting from interactions between  
38 economic and non-economic empowerment.  
39  
40  
41  
42  
43  
44  
45  
46  
47  
48  
49  
50  
51  
52  
53  
54  
55  
56  
57  
58  
59  
60

Formatted: Font color: Text 1

Formatted: Font color: Text 1, English (U.K.)

The results of this study still have policy implications. Microfinance programs in Bangladesh make claims in their marketing campaigns about social responsibility. These organizations can therefore be expected to act with particular social conscientiousness. According to the results of this study, microfinance firms should be aware that program membership may increase IPV exposure among women belonging to risk groups. Alternatively, microfinance firms should ~~be aware~~ ~~inform applicants~~ that microfinance program membership among formally educated women ~~might reflect an increased~~ ~~may increase the risk for~~ exposure ~~of to~~ IPV. However, before demands to provide information about risk for IPV can be put on microfinance firms, the identification of risk groups should be confirmed in prospective studies.

**Conflict of interest:** None declared.

**Acknowledgement:** The authors are grateful to the field staff and management of Measure DHS for procuring data and permission to use them.

## References

1. WHO. *World report on violence and health*. Geneva, Switzerland: World Health Organization, 2002.
2. Diop-Sidibe N, Campbell J, Becker S. **Domestic violence against women in Egypt**. *Soc Sci Med* 2006, **62**: 1260–1277.
3. WHO. *Multi-country study on women's health and domestic violence against women*. Geneva, Switzerland: World Health Organization, 2005.
4. Kim JC, Watts CH, Hargreaves JR, Ndhlovu LX, Phetla G, et al. **Understanding the impact of a microfinance-based intervention on women's empowerment and the**

Formatted: Font color: Text 1, English (U.K.)

Formatted: Font color: Text 1, English (U.K.)

Formatted: Font color: Text 1, English (U.K.)

Formatted: Font color: Text 1

Formatted: Font color: Text 1, English (U.K.)

Formatted: Font color: Text 1

Formatted: Font color: Text 1

Formatted: Font color: Text 1, English (U.K.)

Formatted: Font color: Text 1

Formatted: Font color: Text 1, English (U.K.)



- 1  
2  
3  
4  
5  
6  
7  
8  
9  
10  
11  
12  
13  
14  
15  
16  
17  
18  
19  
20  
21  
22  
23  
24  
25  
26  
27  
28  
29  
30  
31  
32  
33  
34  
35  
36  
37  
38  
39  
40  
41  
42  
43  
44  
45  
46  
47  
48  
49  
50  
51  
52  
53  
54  
55  
56  
57  
58  
59  
60
- reduction of intimate partner violence in South Africa. *Am J Public Health* 2007, **97**: 1794–1802.
5. Dalal K, Rahman F, Jansson B. **Wife abuse in rural Bangladesh.** *J Biosoc Sci* 2009, **41**: 561–573.
6. Khan ME, Ubaidur R, Hossain SMI. **Violence against women and its impact on women's lives – some observations from Bangladesh.** *J Fam Welfare* 2001, **46**: 12–24.
7. Bates LM, Schuler SR, Islam F, Islam MK. **Socioeconomic factors and processes associated with domestic violence in rural Bangladesh.** *Int Fam Plan Perspect* 2004, **30**: 190–199.
8. Commission on Social Determinants of Health. *Closing the gap in a generation: health equity through action on the social determinants of health. Final report.* Geneva, Switzerland: World Health Organization, 2008.
9. Schuler SR, Hashemi SM. **Credit programmes, women's empowerment and contraceptive use in rural Bangladesh.** *Stud Fam Plan* 1994, **25**: 65–76.
10. Hashemi SM, Schuler SR, Riley AP. **Rural credit programmes and women's empowerment in Bangladesh.** *World Dev* 1996, **24**: 635–653.
11. Khandker SR. *Fighting poverty with microcredit: experience in Bangladesh.* New York: Oxford University Press, 1998.
12. Schuler S, Hashemi S, Riley A. **The influence of women's changing roles and status in Bangladesh's fertility transition: evidence from a study of credit programmes and contraceptive use.** *World Dev* 1997, **25**: 563–575.
13. Mayoux L. **Women's empowerment and microfinance programmes: strategies for increasing impact.** *Dev Pract* 198, **8**: 235–241.

Formatted: Font color: Text 1

Formatted: Font color: Text 1, English (U.K.)

Formatted: Font color: Text 1

Formatted: Font color: Text 1, English (U.K.)

- 1  
2  
3  
4  
5  
6  
7  
8  
9  
10  
11  
12  
13  
14  
15  
16  
17  
18  
19  
20  
21  
22  
23  
24  
25  
26  
27  
28  
29  
30  
31  
32  
33  
34  
35  
36  
37  
38  
39  
40  
41  
42  
43  
44  
45  
46  
47  
48  
49  
50  
51  
52  
53  
54  
55  
56  
57  
58  
59  
60
14. UNFPA Microcredit Summit Campaign . *From microfinance to macro change: integrating health education and microfinance to empower women and reduce poverty*. New York: Microcredit Summit Campaign and the United Nations Population Fund, 2006.
15. Ahmed SM. **Intimate partner violence against women: experiences from a woman-focused development programme in Matlab, Bangladesh**. *J Health Popul Nutr* 2006, **23**: 95–101.
16. Pronyk PM, Hargreaves JR, Kim JC, Morison LA, Phetla G, et al. **(Effect of a structural intervention for the prevention of intimate-partner violence and HIV in rural South Africa: a cluster randomized trial**. *Lancet* 2006, **368**: 1973–1983.
17. Schuler SR, Hashemi SM, Badal SH. **Men's violence against women in rural Bangladesh: undermined or exacerbated by microcredit programmes?** *Dev Pract* 1998, **8**: 148–157.
18. The Nobel Peace Prize for 2006. Available: [http://nobelprize.org/nobel\\_prizes/peace/laureates/2006/press.html](http://nobelprize.org/nobel_prizes/peace/laureates/2006/press.html). Accessed 10 October 2012.
19. Koenig, MA, Ahmed S, Hossain MB, Mozumder ABMKA. **Women's status and domestic violence in rural Bangladesh: individual- and community-level effects**. *Demography* 2003, **40**: 269–288.
20. STROBE statement. Available: <http://www.strobe-statement.org/>. Accessed 13 January 2012.
21. Kishor S, Johnson K .*Profiling domestic violence: a multi-country study*. Calverton, MD: ORC Macro, 2004.

Formatted: Font color: Text 1, English (U.K.)

Formatted: Font color: Text 1, English (U.K.)

Formatted: Font color: Text 1, English (U.K.)

Formatted: Font color: Text 1

Formatted: Font color: Text 1, English (U.K.)

Formatted: Font color: Text 1, English (U.K.)

Formatted: Font color: Text 1, English (U.K.)

Formatted: Font color: Text 1

Formatted: Font color: Text 1, English (U.K.)

1  
2  
3  
4  
5  
6  
7  
8  
9  
10  
11  
12  
13  
14  
15  
16  
17  
18  
19  
20  
21  
22  
23  
24  
25  
26  
27  
28  
29  
30  
31  
32  
33  
34  
35  
36  
37  
38  
39  
40  
41  
42  
43  
44  
45  
46  
47  
48  
49  
50  
51  
52  
53  
54  
55  
56  
57  
58  
59  
60

22. Strauss M. *Measuring intra-family conflict and violence: the conflict tactics (CT) scales*.

In: Strauss MA, Gelles RJ, editors. *Physical violence in American families: risk factors and adaptations to violence in 8145 families*. New Brunswick: Transaction Publishers, 1998: 29–47.

Formatted: Font color: Text 1

Formatted: Font color: Text 1, English (U.K.)

Formatted: Font color: Text 1

23. Rutstein SO, Johnson K. *The DHS wealth index*. DHS comparative reports no. 6. Calverton, MD: ORC Macro, 2004.

24. WHO. *Putting women first: ethical and safety recommendations for research on domestic violence against women*. Geneva, Switzerland: World Health Organization, 2001.

Formatted: Font color: Text 1, English (U.K.)

25. Johnston HB, Naved RT. **Spousal violence in Bangladesh: a call for a public-health response**. *J Health Popul Nutr* 2008, **26**: 366–377.

26. Schuler S, Hashemi S, Riley P, Akhter S. **Credit programs, patriarchy and men's violence against women in rural Bangladesh**. *Soc Sci Med* 1996, **43**: 1729–1742.

Formatted: Font color: Text 1

27. Bhuiya A, Sharmin T, Hanifi SMA. **Nature of domestic violence against women in a rural area of Bangladesh: implication for preventive interventions**. 2003, **21**: 48–54.

28. Silverman JG, Decker MR, Kapur NA, Gupta J, Raj A. **Violence against wives, sexual risk and sexually transmitted infection among Bangladeshi men**. *Sex Transm Infect* 2007, **83**: 211–215.

29. Naved RT, Azim S, Bhuiya A, Persson LA. **Physical violence by husbands: magnitude, disclosure and help-seeking behavior of women in Bangladesh**. *Soc Sci Med* 2006, **62**: 2917–2929.

Formatted: Font color: Text 1, English (U.K.)

30. Salam A, Alim A, Noguchi T. **Spousal abuse against women and its consequences on reproductive health: a study in the urban slums in Bangladesh**. *Matern Child Health J* 2006, **10**: 83–94.

Formatted: Font color: Text 1

1  
2  
3  
4  
5  
6  
7  
8  
9 31. Naved RT, Rimi NA, Jahan S, Lindmark G. **Paramedic-conducted mental health**  
10 **counselling for abused women in rural Bangladesh: an evaluation from the perspective**  
11 **of participants.** *J Health Popul Nutr* 2006, **27**: 477–491.  
12  
13  
14

Formatted: Font color: Text 1, English (U.K.)

Formatted: Font: (Default) Times New Roman, 12 pt, Font color: Text 1, English (U.K.)

Formatted: Font color: Text 1, English (U.K.)

1  
2  
3  
4  
5  
6  
7  
8  
9  
10  
11  
12  
13  
14  
15  
16  
17  
18  
19  
20  
21  
22  
23  
24  
25  
26  
27  
28  
29  
30  
31  
32  
33  
34  
35  
36  
37  
38  
39  
40  
41  
42  
43  
44  
45  
46  
47  
48  
49  
50  
51  
52  
53  
54  
55  
56  
57  
58  
59  
60

Figure 1. Study participation displayed according to the STROBE statement.

For peer review only

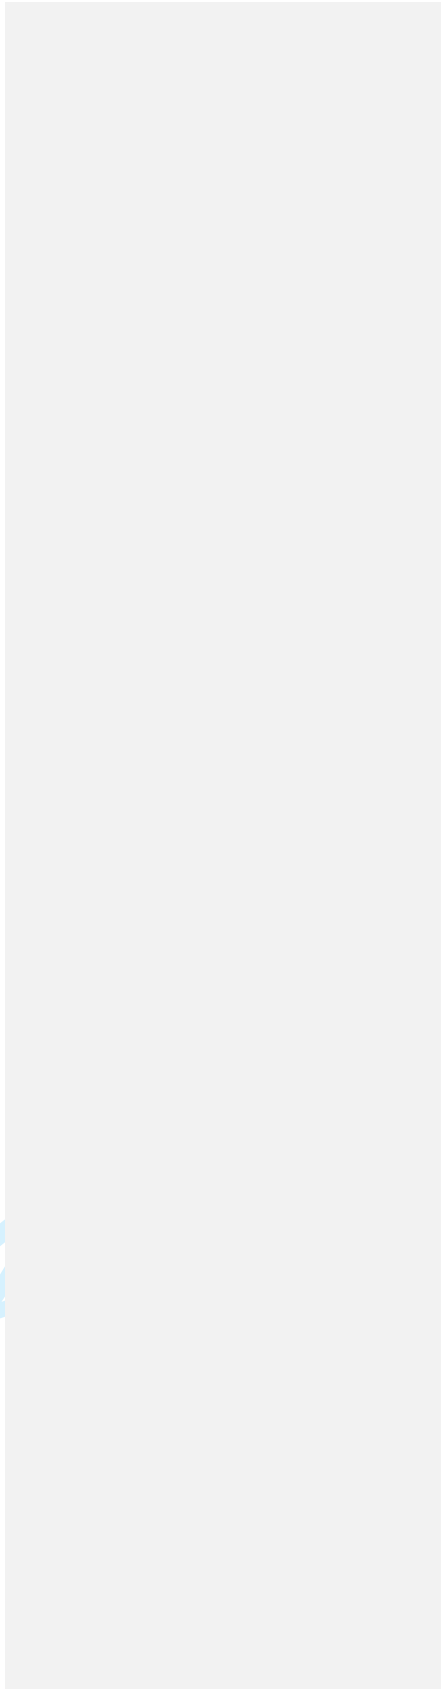

**Table 1.** Membership in microfinance programs (%) among the survey participants (N = 10,996) divided by response and non-response to the IPV question and displayed by age, residence, education, religion, sex of household head, and household wealth index. The Chi-square tests are presented for differences in distribution of microfinance program membership between the respondents and the non-respondents to IPV questions.

|                       | Respondents to IPV questions |                  | Non-respondents to IPV questions |                  | Total |                  |
|-----------------------|------------------------------|------------------|----------------------------------|------------------|-------|------------------|
|                       | n                            | Microfinance (%) | n                                | Microfinance (%) | n     | Microfinance (%) |
| <b>Age (years)</b>    |                              |                  |                                  |                  |       |                  |
| 15–19                 | 462                          | 29               | 886                              | 23               | 1348  | 25               |
| 20–24                 | 851                          | 36               | 1323                             | 31               | 2174  | 33               |
| 25–29                 | 866                          | 43               | 1069                             | 37               | 1935  | 40               |
| 30–34                 | 743                          | 40               | 918                              | 39               | 1661  | 39               |
| 35–39                 | 701                          | 41               | 895                              | 41               | 1596  | 41               |
| 40–44                 | 462                          | 42               | 756                              | 38               | 1218  | 39               |
| 45–49                 | 380                          | 36               | 684                              | 35               | 1064  | 35               |
| <b>Residence</b>      |                              |                  |                                  |                  |       |                  |
| Urban                 | 1669                         | 36               | 2482                             | 33               | 4151  | 34               |
| Rural                 | 2796                         | 40*              | 4049                             | 36               | 6845  | 37               |
| <b>Education†</b>     |                              |                  |                                  |                  |       |                  |
| No education*         | 1495                         | 45+              | 2030                             | 40               | 3525  | 42               |
| Primary               | 1348                         | 44               | 1920                             | 40               | 3268  | 42               |
| Secondary             | 1293                         | 31               | 2052                             | 29               | 3345  | 30               |
| Higher                | 327                          | 19               | 528                              | 19               | 855   | 19               |
| <b>Religion</b>       |                              |                  |                                  |                  |       |                  |
| Muslim*               | 4034                         | 38*              | 5890                             | 34               | 9924  | 35               |
| Non-Muslim            | 431                          | 48               | 641                              | 41               | 1072  | 44               |
| <b>Household head</b> |                              |                  |                                  |                  |       |                  |
| Female                | 505                          | 25               | 803                              | 27               | 1308  | 26               |
| Male*                 | 3960                         | 40*              | 5728                             | 36               | 9688  | 38               |
| <b>Marital Status</b> |                              |                  |                                  |                  |       |                  |
| Married*              | 4194                         | 39+              | 5952                             | 35-              | 10146 | 37               |
| Widowed               | 149                          | 38               | 317                              | 29               | 466   | 32               |
| Divorced              | 37                           | 25               | 102                              | 20               | 139   | 24               |
| Not living together   | 85                           | 25               | 160                              | 28               | 245   | 27               |
| <b>Wealth index</b>   |                              |                  |                                  |                  |       |                  |
| Poorest               | 804                          | 47               | 971                              | 41               | 1775  | 44               |
| Poorer                | 857                          | 45               | 1138                             | 42               | 1995  | 43               |
| Middle                | 849                          | 43               | 1246                             | 39               | 2095  | 41               |
| Richer                | 856                          | 41               | 1345                             | 37               | 2201  | 39               |
| Richest               | 1099                         | 23               | 1831                             | 22               | 2930  | 22               |
| <b>Total*</b>         | 446                          | 39*              | 6531                             | 35-              | 6977  | 36               |
|                       | 5                            |                  |                                  |                  | 99    |                  |

Significance for the chi-square test is denoted by \* ( $p < .05$ , Bonferroni corrected for 2226 comparisons in each column). Standardized residuals  $>2$  are indicated by + and standardized residuals  $<-2$  are indicated by -. † Based on N = 10,993 due to missing data.

Formatted ... [1]  
 Formatted ... [2]  
 Formatted ... [3]  
 Formatted ... [4]  
 Formatted ... [5]  
 Formatted ... [6]  
 Formatted ... [7]  
 Formatted ... [8]  
 Formatted ... [9]  
 Formatted ... [11]  
 Formatted ... [10]  
 Formatted ... [12]  
 Formatted ... [13]  
 Formatted ... [14]  
 Formatted ... [15]  
 Formatted ... [16]  
 Formatted ... [17]  
 Formatted ... [18]  
 Formatted ... [19]  
 Formatted ... [20]  
 Formatted ... [21]  
 Formatted ... [22]  
 Formatted ... [23]  
 Formatted ... [24]  
 Formatted ... [25]  
 Formatted ... [26]  
 Formatted ... [27]  
 Formatted ... [28]  
 Formatted ... [29]  
 Formatted ... [30]  
 Formatted ... [31]  
 Formatted ... [32]  
 Formatted ... [33]  
 Formatted ... [34]  
 Formatted ... [35]  
 Formatted ... [36]  
 Formatted ... [37]  
 Formatted ... [38]

25

Table 2. Reported IPV in the final study population (N = 4,465) given as percentages and displayed by age, residence, education, religion, sex of household head, and household wealth index. Chi-square tests are presented for differences in distributions related to each of the variables: age, residence, education, religion, household head, marital status and wealth index.

|                       | n    | Moderate physical violence % | Severe physical violence % | Sexual violence %   | Any violence %      |
|-----------------------|------|------------------------------|----------------------------|---------------------|---------------------|
| <b>Age (years)</b>    |      |                              |                            | $p < .001, V = .10$ |                     |
| 15-19                 | 462  | 42                           | 14                         | 15+                 | 46                  |
| 20-24                 | 851  | 47                           | 14                         | 15+                 | 50                  |
| 25-29                 | 866  | 49                           | 17                         | 12                  | 52                  |
| 30-34                 | 743  | 51                           | 18                         | 10                  | 55                  |
| 35-39                 | 701  | 48                           | 17                         | 9                   | 50                  |
| 40-44                 | 462  | 49                           | 19                         | 7-                  | 50                  |
| 45-49                 | 380  | 49                           | 17                         | 5-                  | 51                  |
| <b>Residence</b>      |      |                              |                            | $p < .01, V = .04$  | $p < .001, V = .05$ |
| Urban                 | 1669 | 46                           | 16                         | 9-                  | 47                  |
| Rural                 | 2796 | 49                           | 17                         | 12                  | 53                  |
| <b>Education†</b>     |      | $p < .001, V = .22$          | $p < .001, V = .17$        |                     | $p < .001, V = .21$ |
| No education          | 1495 | 58+                          | 23+                        | 12                  | 60+                 |
| Primary               | 1348 | 52+                          | 18                         | 12                  | 55+                 |
| Secondary             | 1293 | 39-                          | 10-                        | 9                   | 42-                 |
| Higher                | 327  | 20-                          | 6-                         | 8                   | 24-                 |
| <b>Religion</b>       |      | $p < .001, V = .06$          | $p < .001, V = .05$        | $p < .001, V = .06$ | $p < .001, V = .07$ |
| Muslim                | 4034 | 49                           | 17                         | 11                  | 52                  |
| Non-Muslim            | 431  | 38-                          | 10-                        | 6-                  | 40-                 |
| <b>Household head</b> |      |                              |                            |                     |                     |
| Female                | 505  | 44                           | 16                         | 11                  | 47                  |
| Male                  | 3960 | 49                           | 16                         | 11                  | 52                  |
| <b>Marital Status</b> |      |                              | $p < .001, V = .11$        |                     |                     |
| Married               | 4194 | 48                           | 16                         | 10                  | 51                  |
| Widowed               | 149  | 44                           | 14                         | 11                  | 48                  |
| Divorced              | 37   | 62                           | 43+                        | 19                  | 62                  |
| Not living together   | 85   | 66                           | 38+                        | 24                  | 66                  |
| <b>Wealth index</b>   |      | $p < .001, V = .18$          | $p < .001, V = .14$        | $p < .001, V = .11$ | $p < .001, V = .19$ |
| Poorest               | 804  | 58+                          | 22+                        | 16+                 | 62+                 |
| Poorer                | 857  | 53+                          | 19                         | 13                  | 57+                 |
| Middle                | 849  | 53+                          | 18                         | 11                  | 56+                 |
| Richer                | 856  | 46                           | 18                         | 10                  | 49                  |
| Richest               | 1099 | 34-                          | 8-                         | 6-                  | 36-                 |
| <b>Total</b>          | 4465 | 48                           | 16                         | 11                  | 51                  |

Significant chi-square tests ( $p < .05$ , Bonferroni corrected for 67 tests per column) are reported by  $p$  values and effect size  $V$  (Cramer's  $V$ ). Standardized residuals  $>2$  are indicated by + and standardized residuals  $<-2$  are indicated by -.  
† Based on N = 4463 due to missing data.

Formatted [39]

Formatted Table [40]

Formatted [41]

Formatted [42]

Formatted [43]

Formatted [44]

Formatted [45]

Formatted [46]

Formatted [47]

Formatted [48]

Formatted [49]

Formatted [51]

Formatted [52]

Formatted [54]

Formatted [55]

Formatted [50]

Formatted [53]

Formatted [56]

Formatted [57]

Formatted [58]

Formatted [60]

Formatted [59]

Formatted [61]

Formatted [62]

Formatted [64]

Formatted [66]

Formatted [68]

Formatted [63]

Formatted [65]

Formatted [67]

Formatted [69]

Formatted [70]

Formatted [72]

Formatted [75]

Formatted [78]

Formatted [81]

Formatted [71]

Formatted [73]

Formatted [76]

Formatted [79]

Formatted [82]

Formatted [74]

Formatted [77]

Formatted [80]

**Table 3.** Associations between IPV and membership in microfinance (MF) programs in different sociodemographic strata (n = 4,465). Significant chi-square tests for exposure to IPV and belonging to MF programs are reported by their effect sizes (Cramer's *V*). Odds ratios with 95% confidence intervals (OR; CI95) indicate increased risk for IPV for women belonging to MF programs compared with women who did not belong to such programs. Only significant tests (*p* < .05, Bonferroni corrected for 80104 tests) are reported as significant and standardized residuals >2 are indicated by + and standardized residuals <-2 are indicated by -.

|                        | n    | Moderate physical violence |              |              |        |                    | <i>V</i> (OR; CI95) | Severe physical violence |      |        |                    |  | <i>V</i> (OR; CI95) |
|------------------------|------|----------------------------|--------------|--------------|--------|--------------------|---------------------|--------------------------|------|--------|--------------------|--|---------------------|
|                        |      | No microfinance            |              | Microfinance |        | No microfinance    |                     | Microfinance             |      |        |                    |  |                     |
|                        |      | IPV                        | No IPV       | IPV          | No IPV | IPV                |                     | No IPV                   | IPV  | No IPV |                    |  |                     |
| <b>Age (years)</b>     |      |                            |              |              |        |                    |                     |                          |      |        |                    |  |                     |
| 15-19                  | 462  | 123                        | 204          | 72           | 63     |                    | 47                  | 280                      | 17   | 118    |                    |  |                     |
| 20-24                  | 851  | 218-                       | 327+         | 179+         | 127-   | .18 (2.1; 1.6-2.8) | 58-                 | 487                      | 62+  | 244    | .13 (2.1; 1.4-3.2) |  |                     |
| 25-29                  | 866  | 216                        | 279          | 205          | 166    |                    | 73                  | 422                      | 75   | 296    |                    |  |                     |
| 30-34                  | 743  | 207                        | 238          | 175          | 123    |                    | 68                  | 377                      | 64   | 234    |                    |  |                     |
| 35-39                  | 701  | 173                        | 243          | 160+         | 125-   | .14 (1.8; 1.3-2.4) | 55                  | 361                      | 62   | 223    |                    |  |                     |
| 40-44                  | 462  | 114                        | 156          | 114+         | 78-    | .17 (2.0; 1.4-2.9) | 39                  | 231                      | 47   | 145    |                    |  |                     |
| 45-49                  | 380  | 114                        | 129          | 74           | 63     |                    | 37                  | 206                      | 27   | 110    |                    |  |                     |
| <b>Residence</b>       |      |                            |              |              |        |                    |                     |                          |      |        |                    |  |                     |
| Urban                  | 1669 | 418-                       | 645+         | 345+         | 261-   | .17 (2.0; 1.7-2.5) | 138-                | 925                      | 121+ | 485    | .09 (1.7)          |  |                     |
| Rural                  | 2796 | 747-                       | 931+         | 634+         | 484-   | .12 (1.6; 1.4-1.9) | 239-                | 1439                     | 233+ | 885    | -.09 (1.6)         |  |                     |
| <b>Education†</b>      |      |                            |              |              |        |                    |                     |                          |      |        |                    |  |                     |
| No education           | 1495 | 463                        | 363          | 402          | 267    |                    | 181                 | 645                      | 166  | 503    |                    |  |                     |
| Primary                | 1348 | 356-                       | 400+         | 348+         | 244-   | .12 (1.6; 1.3-2.0) | 115                 | 641                      | 126  | 466    |                    |  |                     |
| Secondary              | 1293 | 302-                       | 591+         | 207+         | 193-   | .17 (2.1; 1.7-2.7) | 70                  | 823                      | 55   | 345    |                    |  |                     |
| Higher                 | 327  | 44                         | 220          | 22           | 41     |                    | 11                  | 253                      | 7    | 56     |                    |  |                     |
| <b>Religion</b>        |      |                            |              |              |        |                    |                     |                          |      |        |                    |  |                     |
| Muslim                 | 4034 | 1093-                      | 1425+        | 886+         | 630-   | .15 (1.8; 1.6-2.1) | 357-                | 2161                     | 330+ | 1186-  | .10 (1.7; 1.3-2.2) |  |                     |
| Non-Muslim             | 431  | 72                         | 151          | 93           | 115    |                    | 20                  | 203                      | 24   | 184    |                    |  |                     |
| <b>Household head</b>  |      |                            |              |              |        |                    |                     |                          |      |        |                    |  |                     |
| Female                 | 505  | 154                        | 227          | 66           | 58     |                    | 53                  | 328                      | 28   | 96     |                    |  |                     |
| Male                   | 3960 | 1011-                      | 1349+        | 913+         | 687-   | .14 (1.8; 1.6-2.0) | 324-                | 2036+                    | 326+ | 1274-  |                    |  |                     |
| <b>Marital Status</b>  |      |                            |              |              |        |                    |                     |                          |      |        |                    |  |                     |
| Married                | 4194 | 1071                       | 1490         | 930          | 704    | .15 (1.8; 1.6-2.1) | 330                 | 2230                     | 332  | 1302   | .10 (1.7; 1.4-2.0) |  |                     |
| Widowed                | 149  | 40                         | 54           | 26           | 30     |                    | 11                  | 82                       | 10   | 46     |                    |  |                     |
| Divorced               | 37   | 14                         | 10           | 9            | 4      |                    | 10                  | 14                       | 6    | 7      |                    |  |                     |
| Not living together    | 85   | 42                         | 22           | 14           | 7      |                    | 26                  | 38                       | 6    | 15     |                    |  |                     |
| <b>Wealth Index</b>    |      |                            |              |              |        |                    |                     |                          |      |        |                    |  |                     |
| Poorest                | 804  | 249                        | 177          | 219          | 159    |                    | 96                  | 330                      | 84   | 294    |                    |  |                     |
| Poorer                 | 857  | 234                        | 240          | 221          | 162    |                    | 84                  | 390                      | 77   | 306    |                    |  |                     |
| Middle                 | 849  | 237                        | 251          | 217          | 144    |                    | 77                  | 411                      | 76   | 285    |                    |  |                     |
| Richer                 | 856  | 191-                       | 311+         | 207+         | 147-   | .20 (2.3; 1.7-3.0) | 60-                 | 442                      | 90+  | 264    | .17 (2.5; 1.8-3.6) |  |                     |
| Richest                | 1099 | 254                        | 597          | 115+         | 133-   | .15 (2.0; 1.5-2.7) | 60                  | 791                      | 27   | 221    |                    |  |                     |
| <b>Sexual violence</b> |      |                            |              |              |        |                    |                     |                          |      |        |                    |  |                     |
|                        |      | No                         | Microfinance |              |        | <i>V</i> (OR)      | No                  | Microfinance             |      |        | <i>V</i> (OR)      |  |                     |
|                        |      |                            |              |              |        |                    |                     |                          |      |        |                    |  |                     |

Formatted [104]

Formatted [105]

Formatted Table [106]

Formatted [108]

Formatted [109]

Formatted [110]

Formatted [111]

Formatted [112]

Formatted [107]

Formatted [113]

Formatted [114]

Formatted [115]

Formatted [116]

Formatted [117]

Formatted [118]

Formatted [119]

Formatted [121]

Formatted [122]

Formatted [123]

Formatted [120]

Formatted [124]

Formatted [125]

Formatted [128]

Formatted [126]

Formatted [127]

Formatted [129]

Formatted [130]

Formatted [132]

Formatted [131]

Formatted [133]

Formatted [134]

Formatted [135]

Formatted [136]

Formatted [137]

Formatted [138]

Formatted [139]

Formatted [140]

Formatted Table [141]

Formatted [142]

Formatted [143]

Formatted [144]

Formatted [146]

Formatted [145]

Formatted [147]



1  
2  
3  
4  
5  
6  
7  
8  
9  
10  
11  
12  
13  
14  
15  
16  
17  
18  
19  
20  
21  
22  
23  
24  
25  
26  
27  
28  
29  
30  
31  
32  
33  
34  
35  
36  
37  
38  
39  
40  
41  
42  
43  
44  
45  
46  
47  
48  
49

|                       | N    | microfinance |           |         |           | microfinance |           |         |           |                                          |
|-----------------------|------|--------------|-----------|---------|-----------|--------------|-----------|---------|-----------|------------------------------------------|
|                       |      | IP<br>V      | No<br>IPV | IP<br>V | No<br>IPV | IP<br>V      | No<br>IPV | IP<br>V | No<br>IPV |                                          |
| <b>Age</b>            |      |              |           |         |           |              |           |         |           |                                          |
| 15-19                 | 462  | 52           | 275       | 15      | 120       | 139          | 188       | 75      | 60        |                                          |
| 20-24                 | 851  | 83           | 462       | 42      | 264       | 245          | 300       | 184+    | 122-      | .15 (1.8)                                |
| 25-29                 | 866  | 47           | 448       | 54      | 317       | 231          | 264       | 221+    | 150-      | -.13 (-1.74-2.5)                         |
| 30-34                 | 743  | 42           | 403       | 34      | 264       | 223          | 222       | 182     | 116       |                                          |
| 35-39                 | 701  | 29           | 387       | 35      | 250       | 183          | 233       | 164     | 121       | .13 (1.7; 1.3-2.2)                       |
| 40-44                 | 462  | 19           | 251       | 12      | 180       | 117          | 153       | 116     | 76-       |                                          |
| 45-49                 | 380  | 14           | 229       | 5       | 132       | 120          | 123       | 75      | 62        | .13 (1.7; 1.3-2.3)<br>.17 (2.0; 1.4-2.9) |
| <b>Residence</b>      |      |              |           |         |           |              |           |         |           |                                          |
| Urban                 | 1669 | 90           | 973       | 64      | 542       | 436-         | 627+      | 355+    | 251-      | .17 (2.0; 1.6-2.5)                       |
| Rural                 | 2796 | 196          | 1482      | 133     | 985       | 822-         | 856+      | 662+    | 456-      | .10 (1.5; 1.7-5.3)                       |
| <b>Education</b>      |      |              |           |         |           |              |           |         |           |                                          |
| No education          | 1495 | 101          | 725       | 76      | 593       | 486          | 340       | 415     | 254       |                                          |
| Primary               | 1348 | 96           | 660       | 67      | 525       | 389          | 367       | 359     | 233       |                                          |
| Secondary             | 1293 | 74           | 819       | 43      | 357       | 330-         | 563+      | 216+    | 184-      | .16 (2.0; 1.6-2.5)                       |
| Higher                | 327  | 15           | 249       | 11      | 52        | 53           | 211       | 27+     | 36        | .21 (3.0; 1.7-5.3)                       |
| <b>Religion</b>       |      |              |           |         |           |              |           |         |           |                                          |
| Muslim                | 4034 | 276          | 2242      | 183     | 1333      | 1183-        | 1335+     | 920+    | 596-      | .13 (1.7; 1.5-2.0)                       |
| Non-Muslim            | 431  | 10           | 213       | 14      | 194       | 75           | 148       | 97      | 111       |                                          |
| <b>Household head</b> |      |              |           |         |           |              |           |         |           |                                          |
| Female                | 505  | 44           | 337       | 12      | 112       | 167          | 214       | 68      | 56        |                                          |
| Male                  | 3960 | 242          | 2118      | 185     | 1415      | 1269+        | 1091-     | 949+    | 651-      | .13 (1.3; 1.1-2.4)                       |
| <b>Marital Status</b> |      |              |           |         |           |              |           |         |           |                                          |
| Married               | 4194 | 255          | 2306      | 185     | 1449      | 1157         | 1403      | 967     | 667       | .14 (1.8; 1.6-2.0)                       |
| Widowed               | 149  | 12           | 82        | 5       | 51        | 45           | 48        | 27      | 29        |                                          |
| Divorced              | 37   | 5            | 19        | 2       | 11        | 14           | 10        | 9       | 4         |                                          |
| Not living together   | 85   | 15           | 49        | 5       | 16        | 42           | 22        | 14      | 7         |                                          |
| <b>Wealth Index</b>   |      |              |           |         |           |              |           |         |           |                                          |
| Poorest               | 804  | 79           | 347       | 52      | 326       | 271          | 155       | 229     | 149       |                                          |
| Poorer                | 857  | 62           | 412       | 46      | 337       | 255          | 219       | 230     | 153       |                                          |
| Middle                | 849  | 48           | 440       | 44      | 317       | 254          | 234       | 224     | 137       |                                          |
| Richer                | 856  | 45           | 457       | 40      | 314       | 203-         | 299+      | 214+    | 140-      | .20 (2.3; 1.7-3.0)                       |
| Richest               | 1099 | 52           | 799       | 15      | 233       | 275          | 576       | 120+    | 128-      | .14 (2.0; 1.5-2.6)                       |

† Based on N = 4,463 due to missing data.

- Formatted ... [156]
- Formatted ... [157]
- Formatted ... [158]
- Formatted ... [159]
- Formatted ... [160]
- Formatted ... [161]
- Formatted ... [162]
- Formatted ... [163]
- Formatted ... [165]
- Formatted ... [166]
- Formatted ... [167]
- Formatted ... [168]
- Formatted ... [164]
- Formatted ... [169]
- Formatted ... [171]
- Formatted ... [172]
- Formatted ... [173]
- Formatted ... [174]
- Formatted ... [170]
- Formatted ... [175]
- Formatted ... [176]
- Formatted ... [177]
- Formatted ... [178]
- Formatted ... [179]
- Formatted ... [180]
- Formatted ... [181]
- Formatted ... [182]
- Formatted ... [183]
- Formatted ... [184]
- Formatted Table ... [185]
- Formatted ... [186]
- Formatted ... [187]
- Formatted ... [188]
- Formatted ... [189]
- Formatted ... [190]

**Table 4.** Increase in IPV by membership in microfinance programs compared with non-membership displayed with regard to interaction with the woman’s educational level and spousal equity (N=4 463, there were missing data for two participants on woman’s education). Spousal equity is estimated by household decision-making policies regarding health issues and daily household purchases. The risk increase is given as the odds ratios (OR) with corresponding 95% confidence intervals.

|                           |                   | Increase in IPV associated with microfinance program membership |                          |                  |                     |                   |                   |                  |
|---------------------------|-------------------|-----------------------------------------------------------------|--------------------------|------------------|---------------------|-------------------|-------------------|------------------|
|                           |                   | Moderate physical violence                                      | Severe physical violence | Sexual violence  | Any violence        |                   |                   |                  |
| Spousal equity            | Woman’s education | n                                                               | OR [95% CI]              | OR [95% CI]      | OR [95% CI]         |                   |                   |                  |
| Health decisions<br>Woman | No schooling      | 957                                                             | 1.20 [0.92 1.55]         | 1.06 [0.79 1.43] | 0.88 [0.58 1.32]    | 1.16 [0.89 1.51]  |                   |                  |
|                           | Primary           | 8                                                               | 1.83 [1.39 2.40]         | 1.65 [1.17 2.33] | 0.93 [0.61 1.40]    | 1.70 [1.29 2.24]  |                   |                  |
|                           | Secondary         | 8                                                               | 2.74 [2.03 3.69]         | 2.06 [1.31 3.24] | 1.34 [0.83 2.14]    | 2.69 [2.00 3.63]  |                   |                  |
|                           | Higher            | 2                                                               | 3.20 [1.62 6.34]         | 2.00 [0.65 6.12] | 4.55 [1.85 11.19]   | 3.95 [2.06 7.58]  |                   |                  |
|                           | Other             | No schooling                                                    | 5                        | 1.14 [0.81 1.61] | 1.42 [0.94 2.14]    | 1.00 [0.60 1.65]  | 1.10 [0.78 1.56]  |                  |
|                           |                   | Primary                                                         | 4                        | 1.26 [0.88 1.81] | 1.25 [0.77 2.03]    | 0.79 [0.45 1.39]  | 1.10 [0.76 1.57]  |                  |
|                           |                   | Secondary                                                       | 4                        | 1.25 [0.83 1.89] | 1.51 [0.77 2.97]    | 1.29 [0.62 2.68]  | 1.14 [0.76 1.71]  |                  |
|                           |                   | Higher                                                          | 7                        | 1.47 [0.34 6.44] | 15.25 [1.24 187.85] | 0 [-]             | 1.05 [0.24 4.51]  |                  |
|                           |                   | Daily purchase decisions<br>Women                               | No schooling             | 1                | 1.11 [0.86 1.42]    | 1.04 [0.78 1.39]  | 0.94 [0.62 1.41]  | 1.09 [0.85 1.40] |
|                           |                   |                                                                 | Primary                  | 8                | 1.92 [1.46 2.51]    | 1.79 [1.26 2.53]  | 0.89 [0.57 1.37]  | 1.70 [1.30 2.22] |
|                           |                   |                                                                 | Secondary                | 8                | 2.16 [1.61 2.89]    | 2.06 [1.32 3.23]  | 1.34 [0.83 2.14]  | 2.08 [1.56 2.78] |
|                           |                   |                                                                 | Higher                   | 2                | 2.90 [1.44 5.86]    | 2.80 [0.76 10.32] | 4.55 [1.61 12.81] | 3.02 [1.54 5.91] |

Formatted [191]

Formatted [192]

Formatted [194]

Formatted [195]

Formatted [193]

Formatted [196]

Formatted [197]

Formatted [198]

Formatted [199]

Formatted [200]

Formatted [201]

Formatted [202]

Formatted [203]

Formatted [204]

Formatted [205]

Formatted [206]

Formatted [207]

Formatted [208]

Formatted [209]

Formatted [210]

Formatted [211]

Formatted [212]

Formatted [213]

Formatted [214]

Formatted [215]

Formatted [216]

Formatted [217]

Formatted [218]

Formatted [219]

Formatted [220]

Formatted [221]

Formatted [222]

Formatted [223]

Formatted [224]

Formatted [225]

Formatted [226]

Formatted [227]

Formatted [228]

Formatted [229]

Formatted [230]

Formatted [231]

Formatted [232]

Formatted [233]

Formatted [234]

1  
2  
3  
4  
5  
6  
7  
8  
9  
10  
11  
12  
13  
14  
15  
16  
17  
18  
19  
20  
21  
22  
23  
24  
25  
26  
27  
28  
29  
30  
31  
32  
33  
34  
35  
36  
37  
38  
39  
40  
41  
42  
43  
44  
45  
46  
47  
48  
49

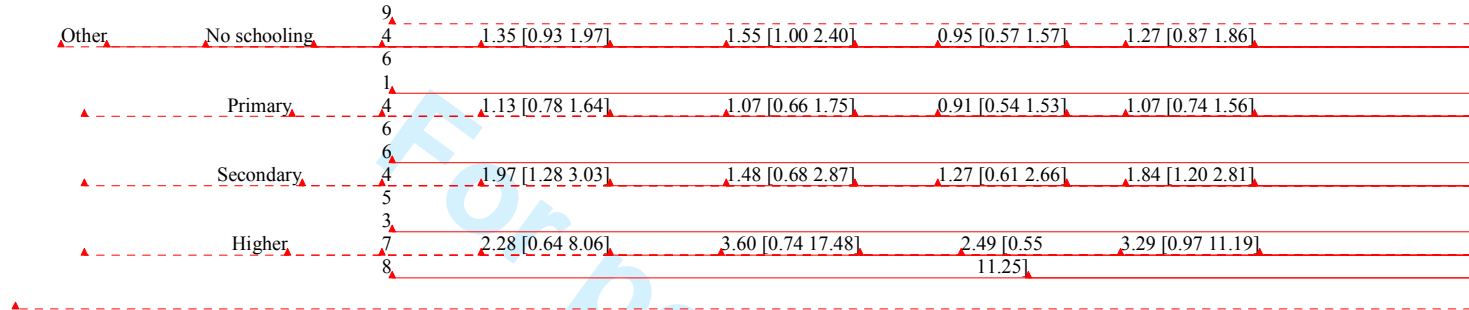

- Formatted: Font color: Text 1, English (U.K.), Not Small caps
- Formatted ... [283]
- Formatted ... [284]
- Formatted ... [285]
- Formatted ... [286]
- Formatted ... [287]
- Formatted ... [288]
- Formatted ... [289]
- Formatted: Font color: Text 1, English (U.K.)
- Formatted ... [290]
- Formatted ... [291]
- Formatted ... [292]
- Formatted ... [293]
- Formatted ... [294]
- Formatted ... [295]
- Formatted: Font color: Text 1, English (U.K.)
- Formatted ... [296]
- Formatted ... [297]
- Formatted ... [298]
- Formatted ... [299]
- Formatted ... [300]
- Formatted ... [301]
- Formatted: Font color: Text 1, English (U.K.)
- Formatted ... [302]
- Formatted ... [303]
- Formatted ... [304]
- Formatted ... [305]
- Formatted ... [306]
- Formatted ... [307]
- Formatted: Font color: Text 1, English (U.K.)

5/27/2013 12:04:00 PM

1  
2 5/27/2013 12:04:00 PM

3  
4 5/27/2013 12:04:00 PM

5  
6  
7 5/27/2013 12:04:00 PM

8  
9  
10 5/27/2013 12:04:00 PM

11  
12  
13 5/27/2013 12:04:00 PM

14  
15  
16 5/27/2013 12:04:00 PM

17  
18  
19 5/27/2013 12:04:00 PM

20  
21 5/27/2013 12:04:00 PM

22  
23  
24 5/27/2013 12:04:00 PM

25  
26  
27 5/27/2013 12:04:00 PM

28  
29  
30 5/27/2013 12:04:00 PM

31  
32  
33 5/27/2013 12:04:00 PM

34  
35  
36 5/27/2013 12:04:00 PM

37  
38 5/27/2013 12:04:00 PM

39  
40  
41 5/27/2013 12:04:00 PM

42  
43  
44  
45

46  
47  
48  
49

50  
51  
52

53  
54  
55

56  
57  
58

59  
60

For peer review only

1 5/27/2013 12:04:00 PM

2

3 5/27/2013 12:04:00 PM

4

5

6 5/27/2013 12:04:00 PM

7

8

9 5/27/2013 12:04:00 PM

10

11

12 5/27/2013 12:04:00 PM

13

14 5/27/2013 12:04:00 PM

15

16

17 5/27/2013 12:04:00 PM

18

19

20 5/27/2013 12:04:00 PM

21

22

23 5/27/2013 12:04:00 PM

24

25

26 5/27/2013 12:04:00 PM

27

28

29 5/27/2013 12:04:00 PM

30

31

32 5/27/2013 12:04:00 PM

33

34 5/27/2013 12:04:00 PM

35

36

37 5/27/2013 12:04:00 PM

38

39

40 5/27/2013 12:04:00 PM

41

42

43

44

45

46

47

48

49

50

51

52

53

54

55

56

57

58

59

60

For peer review only

5/27/2013 12:04:00 PM

1  
2 5/27/2013 12:04:00 PM

3  
4 5/27/2013 12:04:00 PM

5  
6  
7 5/27/2013 12:04:00 PM

8  
9  
10 5/27/2013 12:04:00 PM

11  
12  
13 5/27/2013 12:04:00 PM

14  
15  
16 5/27/2013 12:04:00 PM

17  
18  
19 5/27/2013 12:04:00 PM

20  
21 5/27/2013 12:04:00 PM

22  
23  
24 5/27/2013 12:04:00 PM

25  
26  
27 5/27/2013 12:04:00 PM

28  
29  
30 5/27/2013 12:04:00 PM

31  
32  
33 5/27/2013 12:04:00 PM

34  
35  
36 5/27/2013 12:04:00 PM

37  
38 5/27/2013 12:04:00 PM

39  
40  
41 5/27/2013 12:04:00 PM

42  
43

44  
45

46  
47

48  
49

50  
51

52  
53

54  
55  
56  
57  
58  
59  
60

For peer review only

1 5/27/2013 12:04:00 PM

2

3 5/27/2013 12:04:00 PM

4

5

6 5/27/2013 12:04:00 PM

7

8

9 5/27/2013 12:04:00 PM

10

11

12 5/27/2013 12:04:00 PM

13

14

15 5/27/2013 12:04:00 PM

16

17 5/27/2013 12:04:00 PM

18

19

20 5/27/2013 12:04:00 PM

21

22

23

24

25

26 5/27/2013 12:04:00 PM

27

28

29 5/27/2013 12:04:00 PM

30

31

32

33

34 5/27/2013 12:04:00 PM

35

36

37 5/27/2013 12:04:00 PM

38

39

40

41

42

43

44

45

46

47

48

49

50

51

52

53

54

55

56

57

58

59

60

For peer review only

5/27/2013 12:04:00 PM

1  
2 5/27/2013 12:04:00 PM

3  
4 5/27/2013 12:04:00 PM

5  
6  
7 5/27/2013 12:04:00 PM

8  
9  
10 5/27/2013 12:04:00 PM

11  
12  
13 5/27/2013 12:04:00 PM

14  
15  
16 5/27/2013 12:04:00 PM

17  
18  
19 5/27/2013 12:04:00 PM

20  
21 5/27/2013 12:04:00 PM

22  
23  
24 5/27/2013 12:04:00 PM

25  
26  
27 5/27/2013 12:04:00 PM

28  
29  
30 5/27/2013 12:04:00 PM

31  
32  
33 5/27/2013 12:04:00 PM

34  
35  
36 5/27/2013 12:04:00 PM

37  
38 5/27/2013 12:04:00 PM

39  
40  
41 5/27/2013 12:04:00 PM

42  
43  
44  
45

46  
47  
48  
49

50  
51  
52

53  
54  
55

56  
57  
58

59  
60

For peer review only



1 5/27/2013 12:04:00 PM

2

3 5/27/2013 12:04:00 PM

4

5

6 5/27/2013 12:04:00 PM

7

8

9 5/27/2013 12:04:00 PM

10

11

12 5/27/2013 12:04:00 PM

13

14

15 5/27/2013 12:04:00 PM

16

17 5/27/2013 12:04:00 PM

18

19

20 5/27/2013 12:04:00 PM

21

22

23 5/27/2013 12:04:00 PM

24

25

26 5/27/2013 12:04:00 PM

27

28

29 5/27/2013 12:04:00 PM

30

31

32 5/27/2013 12:04:00 PM

33

34 5/27/2013 12:04:00 PM

35

36

37 5/27/2013 12:04:00 PM

38

39

40 5/27/2013 12:04:00 PM

41

42

43

44

45

46

47

48

49

50

51

52

53

54

55

56

57

58

59

60

For peer review only

5/27/2013 12:04:00 PM

1

5/27/2013 12:04:00 PM

2

3

4

5/27/2013 12:04:00 PM

5

6

7

5/27/2013 12:04:00 PM

8

9

10

5/27/2013 12:04:00 PM

11

12

13

5/27/2013 12:04:00 PM

14

15

5/27/2013 12:04:00 PM

16

17

18

5/27/2013 12:04:00 PM

19

20

21

5/27/2013 12:04:00 PM

22

23

24

5/27/2013 12:04:00 PM

25

26

27

5/27/2013 12:04:00 PM

28

29

30

5/27/2013 12:04:00 PM

31

32

5/27/2013 12:04:00 PM

33

34

35

5/27/2013 12:04:00 PM

36

37

38

5/27/2013 12:04:00 PM

39

40

41

5/27/2013 12:04:00 PM

42

43

44

45

46

47

48

49

50

51

52

53

54

55

56

57

58

59

60

1 5/27/2013 12:04:00 PM

2

3 5/27/2013 12:04:00 PM

4

5

6 5/27/2013 12:04:00 PM

7

8

9 5/27/2013 12:04:00 PM

10

11

12 5/27/2013 12:04:00 PM

13

14

15 5/27/2013 12:04:00 PM

16

17 5/27/2013 12:04:00 PM

18

19

20 5/27/2013 12:04:00 PM

21

22

23 5/27/2013 12:04:00 PM

24

25

26 5/27/2013 12:04:00 PM

27

28

29 5/27/2013 12:04:00 PM

30

31

32 5/27/2013 12:04:00 PM

33

34 5/27/2013 12:04:00 PM

35

36

37 5/27/2013 12:04:00 PM

38

39

40 5/27/2013 12:04:00 PM

41

42

43

44

45

46

47

48

49

50

51

52

53

54

55

56

57

58

59

60

For peer review only

5/27/2013 12:04:00 PM

1  
2 5/27/2013 12:04:00 PM

3  
4  
5 5/27/2013 12:04:00 PM

6  
7 5/27/2013 12:04:00 PM

8  
9  
10 5/27/2013 12:04:00 PM

11  
12  
13 5/27/2013 12:04:00 PM

14  
15  
16 5/27/2013 12:04:00 PM

17  
18  
19 5/27/2013 12:04:00 PM

20  
21  
22 5/27/2013 12:04:00 PM

23  
24  
25

26  
27 5/27/2013 12:04:00 PM

28  
29  
30 5/27/2013 12:04:00 PM

31  
32  
33 5/27/2013 12:04:00 PM

34  
35  
36 5/27/2013 12:04:00 PM

37  
38  
39 5/27/2013 12:04:00 PM

40  
41 5/27/2013 12:04:00 PM

42  
43  
44  
45

46  
47  
48  
49

50  
51  
52

53  
54  
55

56  
57  
58

59  
60

1 5/27/2013 12:04:00 PM

2

3 5/27/2013 12:04:00 PM

4

5

6 5/27/2013 12:04:00 PM

7

8

9 5/27/2013 12:04:00 PM

10

11

12 5/27/2013 12:04:00 PM

13

14

15 5/27/2013 12:04:00 PM

16

17

18 5/27/2013 12:04:00 PM

19

20 5/27/2013 12:04:00 PM

21

22

23 5/27/2013 12:04:00 PM

24

25

26 5/27/2013 12:04:00 PM

27

28

29 5/27/2013 12:04:00 PM

30

31

32 5/27/2013 12:04:00 PM

33

34

35 5/27/2013 12:04:00 PM

36

37 5/27/2013 12:04:00 PM

38

39

40 5/27/2013 12:04:00 PM

41

42

43

44

45

46

47

48

49

50

51

52

53

54

55

56

57

58

59

60

For peer review only

5/27/2013 12:04:00 PM

1  
2 5/27/2013 12:04:00 PM

3  
4 5/27/2013 12:04:00 PM

5  
6  
7 5/27/2013 12:04:00 PM

8  
9  
10 5/27/2013 12:04:00 PM

11  
12  
13 5/27/2013 12:04:00 PM

14  
15  
16 5/27/2013 12:04:00 PM

17  
18  
19 5/27/2013 12:04:00 PM

20  
21 5/27/2013 12:04:00 PM

22  
23  
24 5/27/2013 12:04:00 PM

25  
26  
27 5/27/2013 12:04:00 PM

28  
29  
30 5/27/2013 12:04:00 PM

31  
32  
33 5/27/2013 12:04:00 PM

34  
35  
36 5/27/2013 12:04:00 PM

37  
38 5/27/2013 12:04:00 PM

39  
40  
41 5/27/2013 12:04:00 PM

42  
43

44  
45

46  
47

48  
49

50  
51

52  
53

54  
55  
56  
57  
58  
59  
60

1 5/27/2013 12:04:00 PM

2

3 5/27/2013 12:04:00 PM

4

5

6 5/27/2013 12:04:00 PM

7

8

9 5/27/2013 12:04:00 PM

10

11

12 5/27/2013 12:04:00 PM

13

14

15 5/27/2013 12:04:00 PM

16

17

18 5/27/2013 12:04:00 PM

19

20 5/27/2013 12:04:00 PM

21

22

23 5/27/2013 12:04:00 PM

24

25

26 5/27/2013 12:04:00 PM

27

28

29 5/27/2013 12:04:00 PM

30

31

32 5/27/2013 12:04:00 PM

33

34

35 5/27/2013 12:04:00 PM

36

37 5/27/2013 12:04:00 PM

38

39

40 5/27/2013 12:04:00 PM

41

42

43

44

45

46

47

48

49

50

51

52

53

54

55

56

57

58

59

60

For peer review only

5/27/2013 12:04:00 PM

1  
2  
3  
4  
5  
6  
7  
8  
9  
10  
11  
12  
13  
14  
15  
16  
17  
18  
19  
20  
21  
22  
23  
24  
25  
26  
27  
28  
29  
30  
31  
32  
33  
34  
35  
36  
37  
38  
39  
40  
41  
42  
43  
44  
45  
46  
47  
48  
49  
50  
51  
52  
53  
54  
55  
56  
57  
58  
59  
60

5/27/2013 12:04:00 PM

lines together, Allow hanging  
space between Asian text and

5/27/2013 12:04:00 PM

5/27/2013 12:04:00 PM

5/27/2013 12:04:00 PM

5/27/2013 12:04:00 PM

adjust space between Latin and  
Alignment: Auto

5/27/2013 12:04:00 PM

For peer review only



5/27/2013 12:04:00 PM

1  
2 5/27/2013 12:04:00 PM

3  
4 5/27/2013 12:04:00 PM

5  
6  
7 5/27/2013 12:04:00 PM

8  
9  
10 5/27/2013 12:04:00 PM

11  
12  
13 5/27/2013 12:04:00 PM

14  
15  
16 5/27/2013 12:04:00 PM

17  
18  
19 5/27/2013 12:04:00 PM

20  
21 5/27/2013 12:04:00 PM

22  
23  
24 5/27/2013 12:04:00 PM

25  
26  
27 5/27/2013 12:04:00 PM

28  
29  
30 5/27/2013 12:04:00 PM

31  
32  
33 5/27/2013 12:04:00 PM

34  
35  
36 5/27/2013 12:04:00 PM

37  
38 5/27/2013 12:04:00 PM

39  
40  
41 5/27/2013 12:04:00 PM

42  
43  
44  
45  
46  
47  
48  
49  
50  
51  
52  
53  
54  
55  
56  
57  
58  
59  
60

For peer review only

1 5/27/2013 12:04:00 PM

2

3

5/27/2013 12:04:00 PM

4

5

6

5/27/2013 12:04:00 PM

7

8

9

5/27/2013 12:04:00 PM

10

11

12 5/27/2013 12:04:00 PM

13

14

15 5/27/2013 12:04:00 PM

16

17

18 5/27/2013 12:04:00 PM

19

20

20 5/27/2013 12:04:00 PM

21

22

23

23 5/27/2013 12:04:00 PM

24

25

26

26 5/27/2013 12:04:00 PM

27

28

29

29 5/27/2013 12:04:00 PM

30

31

31 5/27/2013 12:04:00 PM

32

33

34

34 5/27/2013 12:04:00 PM

35

36

37

37 5/27/2013 12:04:00 PM

38

39

40

40 5/27/2013 12:04:00 PM

41

42

43

44

45

46

47

48

49

50

51

52

53

54

55

56

57

58

59

60

For peer review only

5/27/2013 12:04:00 PM

1  
2 5/27/2013 12:04:00 PM

3  
4  
5 5/27/2013 12:04:00 PM

6  
7 5/27/2013 12:04:00 PM

8  
9  
10 5/27/2013 12:04:00 PM

11  
12  
13 5/27/2013 12:04:00 PM

14  
15  
16 5/27/2013 12:04:00 PM

17  
18  
19 5/27/2013 12:04:00 PM

20  
21 5/27/2013 12:04:00 PM

22  
23  
24 5/27/2013 12:04:00 PM

25  
26  
27 5/27/2013 12:04:00 PM

28  
29  
30 5/27/2013 12:04:00 PM

31  
32  
33 5/27/2013 12:04:00 PM

34  
35  
36 5/27/2013 12:04:00 PM

37  
38 5/27/2013 12:04:00 PM

39  
40  
41 5/27/2013 12:04:00 PM

42  
43  
44  
45  
46  
47  
48  
49  
50  
51  
52  
53  
54  
55  
56  
57  
58  
59  
60

For peer review only

1 5/27/2013 12:04:00 PM

2

3

5/27/2013 12:04:00 PM

4

5

6 5/27/2013 12:04:00 PM

7

8

9 5/27/2013 12:04:00 PM

10

11

12 5/27/2013 12:04:00 PM

13

14

15 5/27/2013 12:04:00 PM

16

17

18 5/27/2013 12:04:00 PM

19

20

20 5/27/2013 12:04:00 PM

21

22

23 5/27/2013 12:04:00 PM

24

25

26 5/27/2013 12:04:00 PM

27

28

29 5/27/2013 12:04:00 PM

30

31

32 5/27/2013 12:04:00 PM

33

34

34 5/27/2013 12:04:00 PM

35

36

37 5/27/2013 12:04:00 PM

38

39

40 5/27/2013 12:04:00 PM

41

42

43

44

45

46

47

48

49

50

51

52

53

54

55

56

57

58

59

60

For peer review only

5/27/2013 12:04:00 PM

1  
2 5/27/2013 12:04:00 PM

3  
4  
5 5/27/2013 12:04:00 PM

6  
7 5/27/2013 12:04:00 PM

8  
9  
10 5/27/2013 12:04:00 PM

11  
12  
13 5/27/2013 12:04:00 PM

14  
15  
16 5/27/2013 12:04:00 PM

17  
18  
19 5/27/2013 12:04:00 PM

20  
21 5/27/2013 12:04:00 PM

22  
23  
24 5/27/2013 12:04:00 PM

25  
26  
27 5/27/2013 12:04:00 PM

28  
29  
30 5/27/2013 12:04:00 PM

31  
32  
33 5/27/2013 12:04:00 PM

34  
35  
36 5/27/2013 12:04:00 PM

37  
38 5/27/2013 12:04:00 PM

39  
40  
41 5/27/2013 12:04:00 PM

42  
43  
44  
45  
46  
47  
48  
49  
50  
51  
52  
53  
54  
55  
56  
57  
58  
59  
60

For peer review only

1 5/27/2013 12:04:00 PM

2

3

5/27/2013 12:04:00 PM

4

5

6

5/27/2013 12:04:00 PM

7

8

9

5/27/2013 12:04:00 PM

10

11

12 5/27/2013 12:04:00 PM

13

14

15 5/27/2013 12:04:00 PM

16

17

18 5/27/2013 12:04:00 PM

19

20

20 5/27/2013 12:04:00 PM

21

22

23

23 5/27/2013 12:04:00 PM

24

25

26

26 5/27/2013 12:04:00 PM

27

28

29

29 5/27/2013 12:04:00 PM

30

31

31 5/27/2013 12:04:00 PM

32

33

34

34 5/27/2013 12:04:00 PM

35

36

37

37 5/27/2013 12:04:00 PM

38

39

40

40 5/27/2013 12:04:00 PM

41

42

43

44

45

46

47

48

49

50

51

52

53

54

55

56

57

58

59

60

For peer review only

5/27/2013 12:04:00 PM

1  
2 5/27/2013 12:04:00 PM

3  
4 5/27/2013 12:04:00 PM

5  
6  
7 5/27/2013 12:04:00 PM

8  
9  
10 5/27/2013 12:04:00 PM

11  
12  
13 5/27/2013 12:04:00 PM

14  
15  
16 5/27/2013 12:04:00 PM

17  
18  
19 5/27/2013 12:04:00 PM

20  
21 5/27/2013 12:04:00 PM

22  
23  
24 5/27/2013 12:04:00 PM

25  
26  
27 5/27/2013 12:04:00 PM

28  
29  
30 5/27/2013 12:04:00 PM

31  
32  
33 5/27/2013 12:04:00 PM

34  
35  
36 5/27/2013 12:04:00 PM

37  
38 5/27/2013 12:04:00 PM

39  
40  
41 5/27/2013 12:04:00 PM

42  
43  
44  
45  
46  
47  
48  
49  
50  
51  
52  
53  
54  
55  
56  
57  
58  
59  
60

For peer review only

1 5/27/2013 12:04:00 PM

2

3 5/27/2013 12:04:00 PM

4

5

6 5/27/2013 12:04:00 PM

7

8

9 5/27/2013 12:04:00 PM

10

11

12 5/27/2013 12:04:00 PM

13

14

15 5/27/2013 12:04:00 PM

16

17

18 5/27/2013 12:04:00 PM

19

20

21 5/27/2013 12:04:00 PM

22

23

24 5/27/2013 12:04:00 PM

25

26

27 5/27/2013 12:04:00 PM

28

29

30 5/27/2013 12:04:00 PM

31

32

33 5/27/2013 12:04:00 PM

34

35

36 5/27/2013 12:04:00 PM

37

38

39 5/27/2013 12:04:00 PM

40

41

42 5/27/2013 12:04:00 PM

43

44

45

46

47

48

49

50

51

52

53

54

55

56

57

58

59

60

For peer review only



5/27/2013 12:04:00 PM

1  
2 5/27/2013 12:04:00 PM

3  
4 5/27/2013 12:04:00 PM

5  
6  
7 5/27/2013 12:04:00 PM

8  
9  
10 5/27/2013 12:04:00 PM

11  
12  
13 5/27/2013 12:04:00 PM

14  
15  
16 5/27/2013 12:04:00 PM

17  
18  
19 5/27/2013 12:04:00 PM

20  
21 5/27/2013 12:04:00 PM

22  
23  
24 5/27/2013 12:04:00 PM

25  
26  
27 5/27/2013 12:04:00 PM

28  
29  
30 5/27/2013 12:04:00 PM

31  
32  
33 5/27/2013 12:04:00 PM

34  
35  
36 5/27/2013 12:04:00 PM

37  
38 5/27/2013 12:04:00 PM

39  
40  
41 5/27/2013 12:04:00 PM

42  
43  
44  
45  
46  
47  
48  
49  
50  
51  
52  
53  
54  
55  
56  
57  
58  
59  
60

For peer review only

1 5/27/2013 12:04:00 PM

2

3 5/27/2013 12:04:00 PM

4

5

6 5/27/2013 12:04:00 PM

7

8

9 5/27/2013 12:04:00 PM

10

11

12 5/27/2013 12:04:00 PM

13

14

15 5/27/2013 12:04:00 PM

16

17

18 5/27/2013 12:04:00 PM

19

20

21 5/27/2013 12:04:00 PM

22

23

24 5/27/2013 12:04:00 PM

25

26

27 5/27/2013 12:04:00 PM

28

29

30 5/27/2013 12:04:00 PM

31

32

33 5/27/2013 12:04:00 PM

34

35

36 5/27/2013 12:04:00 PM

37

38

39 5/27/2013 12:04:00 PM

40

41

42

43

44

45

46

47

48

49

50

51

52

53

54

55

56

57

58

59

60

For peer review only

5/27/2013 12:04:00 PM

1  
2 5/27/2013 12:04:00 PM

3  
4  
5 5/27/2013 12:04:00 PM

6  
7 5/27/2013 12:04:00 PM

8  
9  
10 5/27/2013 12:04:00 PM

11  
12  
13 5/27/2013 12:04:00 PM

14  
15  
16 5/27/2013 12:04:00 PM

17  
18  
19 5/27/2013 12:04:00 PM

20  
21 5/27/2013 12:04:00 PM

22  
23  
24 5/27/2013 12:04:00 PM

25  
26  
27 5/27/2013 12:04:00 PM

28  
29  
30 5/27/2013 12:04:00 PM

31  
32  
33 5/27/2013 12:04:00 PM

34  
35  
36 5/27/2013 12:04:00 PM

37  
38 5/27/2013 12:04:00 PM

39  
40  
41 5/27/2013 12:04:00 PM

42  
43  
44  
45  
46  
47  
48  
49  
50  
51  
52  
53  
54  
55  
56  
57  
58  
59  
60

For peer review only

1  
2  
3  
4  
5  
6  
7  
8  
9  
10  
11  
12  
13  
14  
15  
16  
17  
18  
19  
20  
21  
22  
23  
24  
25  
26  
27  
28  
29  
30  
31  
32  
33  
34  
35  
36  
37  
38  
39  
40  
41  
42  
43  
44  
45  
46  
47  
48  
49  
50  
51  
52  
53  
54  
55  
56  
57  
58  
59  
60

For peer review only

1  
2  
3  
4  
5  
6  
7  
8  
9  
10  
11  
12  
13  
14  
15  
16  
17  
18  
19  
20  
21  
22  
23  
24  
25  
26  
27  
28  
29  
30  
31  
32  
33  
34  
35  
36  
37  
38  
39  
40  
41  
42  
43  
44  
45  
46  
47  
48  
49  
50  
51  
52  
53  
54  
55  
56  
57  
58  
59  
60

**Figure 1.** Study participation displayed according to the STROBE statement.

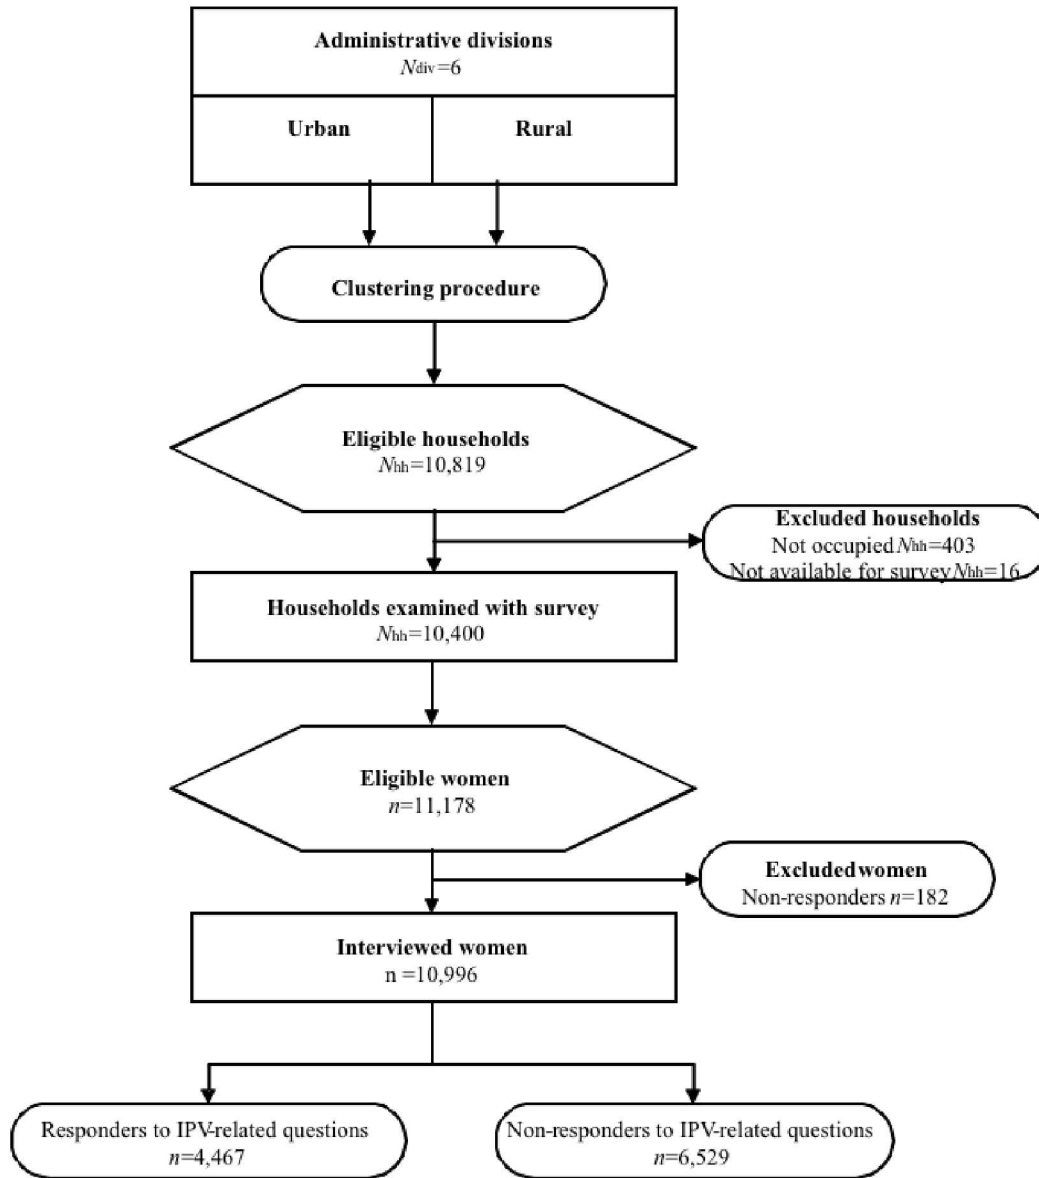

Supplement: bmjopen-2013-002941.draft_revisions.pdf [file bmjopen-2013-002941.draft_revisions.pdf]
